# Supplementary material for: Role of base strength, cluster structure and charge in sulfuric-acid-driven particle formation
Source: Copernicus journal article supplement (doi:10.5194/acp-19-9753-2019), 2019-08-02
Supplement: Supplementary file 1 [file acp-19-9753-2019-supplement.zip]

Archive with 181 entries (180 files):
- Acid-Base-Ions_xyz/
- Acid-Base-Ions_xyz/2A3D.xyz
- Acid-Base-Ions_xyz/.DS_Store
- Acid-Base-Ions_xyz/2a5n1p.xyz
- Acid-Base-Ions_xyz/1B1A1D.xyz
- Acid-Base-Ions_xyz/1B1D.xyz
- Acid-Base-Ions_xyz/3A2D.xyz
- Acid-Base-Ions_xyz/2a3n1p.xyz
- Acid-Base-Ions_xyz/2a1n.xyz
- Acid-Base-Ions_xyz/SupportingInfo-Acid-Base-Ions.pdf
- Acid-Base-Ions_xyz/2A4D.xyz
- Acid-Base-Ions_xyz/1B1A.xyz
- Acid-Base-Ions_xyz/1B.xyz
- Acid-Base-Ions_xyz/1B2A.xyz
- Acid-Base-Ions_xyz/4g.xyz
- Acid-Base-Ions_xyz/3A3D.xyz
- Acid-Base-Ions_xyz/1B3A1D.xyz
- Acid-Base-Ions_xyz/3a3n1p.xyz
- Acid-Base-Ions_xyz/3A5D1P.xyz
- Acid-Base-Ions_xyz/1b4a2n.xyz
- Acid-Base-Ions_xyz/3a2n1p.xyz
- Acid-Base-Ions_xyz/1a4n.xyz
- Acid-Base-Ions_xyz/1b3a4n.xyz
- Acid-Base-Ions_xyz/1A2D.xyz
- Acid-Base-Ions_xyz/3a4n1p.xyz
- Acid-Base-Ions_xyz/2a3g1p.xyz
- Acid-Base-Ions_xyz/1b1n.xyz
- Acid-Base-Ions_xyz/3g1p.xyz
- Acid-Base-Ions_xyz/4A3D1P.xyz
- Acid-Base-Ions_xyz/3a4g.xyz
- Acid-Base-Ions_xyz/1g1p.xyz
- Acid-Base-Ions_xyz/2a2n1p.xyz
- Acid-Base-Ions_xyz/1A.xyz
- Acid-Base-Ions_xyz/2a2g1p.xyz
- Acid-Base-Ions_xyz/2A1D.xyz
- Acid-Base-Ions_xyz/1a4n1p.xyz
- Acid-Base-Ions_xyz/3g.xyz
- Acid-Base-Ions_xyz/1a1g.xyz
- Acid-Base-Ions_xyz/4a4g1p.xyz
- Acid-Base-Ions_xyz/4a2n.xyz
- Acid-Base-Ions_xyz/4A4D1P.xyz
- Acid-Base-Ions_xyz/1B4A1D.xyz
- Acid-Base-Ions_xyz/5D1P.xyz
- Acid-Base-Ions_xyz/2A.xyz
- Acid-Base-Ions_xyz/1a2n.xyz
- Acid-Base-Ions_xyz/3a3n.xyz
- Acid-Base-Ions_xyz/1b2a1n.xyz
- Acid-Base-Ions_xyz/2A1D1P.xyz
- Acid-Base-Ions_xyz/1a3n1p.xyz
- Acid-Base-Ions_xyz/2a4n.xyz
- Acid-Base-Ions_xyz/1A2D1P.xyz
- Acid-Base-Ions_xyz/1D1P.xyz
- Acid-Base-Ions_xyz/4a4g.xyz
- Acid-Base-Ions_xyz/3a4n.xyz
- Acid-Base-Ions_xyz/4A1D.xyz
- Acid-Base-Ions_xyz/3n.xyz
- Acid-Base-Ions_xyz/1a5g1p.xyz
- Acid-Base-Ions_xyz/1B4A4D.xyz
- Acid-Base-Ions_xyz/5g1p.xyz
- Acid-Base-Ions_xyz/1a4g.xyz
- Acid-Base-Ions_xyz/3n1p.xyz
- Acid-Base-Ions_xyz/3a4g1p.xyz
- Acid-Base-Ions_xyz/4n.xyz
- Acid-Base-Ions_xyz/4a5g1p.xyz
- Acid-Base-Ions_xyz/1A4D1P.xyz
- Acid-Base-Ions_xyz/3A1D.xyz
- Acid-Base-Ions_xyz/1b4a1g.xyz
- Acid-Base-Ions_xyz/1b2a2g.xyz
- Acid-Base-Ions_xyz/3D1P.xyz
- Acid-Base-Ions_xyz/4n1p.xyz
- Acid-Base-Ions_xyz/4a1n.xyz
- Acid-Base-Ions_xyz/2a4n1p.xyz
- Acid-Base-Ions_xyz/2a5g1p.xyz
- Acid-Base-Ions_xyz/2g1p.xyz
- Acid-Base-Ions_xyz/4A2D.xyz
- Acid-Base-Ions_xyz/2a1g1p.xyz
- Acid-Base-Ions_xyz/1n.xyz
- Acid-Base-Ions_xyz/1B2A2D.xyz
- Acid-Base-Ions_xyz/1D.xyz
- Acid-Base-Ions_xyz/2D.xyz
- Acid-Base-Ions_xyz/1n1p.xyz
- Acid-Base-Ions_xyz/1b3a2b.xyz
- Acid-Base-Ions_xyz/1a3g.xyz
- Acid-Base-Ions_xyz/1A5D1P.xyz
- Acid-Base-Ions_xyz/1b4a3n.xyz
- Acid-Base-Ions_xyz/1a2g.xyz
- Acid-Base-Ions_xyz/2A2D.xyz
- Acid-Base-Ions_xyz/4a1g.xyz
- Acid-Base-Ions_xyz/3A4D.xyz
- Acid-Base-Ions_xyz/1A1D1P.xyz
- Acid-Base-Ions_xyz/4a3n.xyz
- Acid-Base-Ions_xyz/3a2g.xyz
- Acid-Base-Ions_xyz/1A4D.xyz
- Acid-Base-Ions_xyz/1b3a4g.xyz
- Acid-Base-Ions_xyz/1a3n.xyz
- Acid-Base-Ions_xyz/2n1p.xyz
- Acid-Base-Ions_xyz/2a2g.xyz
- Acid-Base-Ions_xyz/1b1g.xyz
- Acid-Base-Ions_xyz/1B4A3D.xyz
- Acid-Base-Ions_xyz/1a1n1p.xyz
- Acid-Base-Ions_xyz/3a2n.xyz
- Acid-Base-Ions_xyz/1B2A3D.xyz
- Acid-Base-Ions_xyz/1B4A2D.xyz
- Acid-Base-Ions_xyz/1B3A4D.xyz
- Acid-Base-Ions_xyz/1B3A2D.xyz
- Acid-Base-Ions_xyz/1b3a3n.xyz
- Acid-Base-Ions_xyz/4A4D.xyz
- Acid-Base-Ions_xyz/2a2n.xyz
- Acid-Base-Ions_xyz/2a4g.xyz
- Acid-Base-Ions_xyz/2A5D1P.xyz
- Acid-Base-Ions_xyz/2D1P.xyz
- Acid-Base-Ions_xyz/2n.xyz
- Acid-Base-Ions_xyz/4a3n1p.xyz
- Acid-Base-Ions_xyz/1A3D1P.xyz
- Acid-Base-Ions_xyz/2A2D1P.xyz
- Acid-Base-Ions_xyz/1B4A.xyz
- Acid-Base-Ions_xyz/1b4a3g.xyz
- Acid-Base-Ions_xyz/1b1a2n.xyz
- Acid-Base-Ions_xyz/1A1D.xyz
- Acid-Base-Ions_xyz/3A4D1P.xyz
- Acid-Base-Ions_xyz/1a3g1p.xyz
- Acid-Base-Ions_xyz/1b4a4g.xyz
- Acid-Base-Ions_xyz/1A3D.xyz
- Acid-Base-Ions_xyz/2a4g1p.xyz
- Acid-Base-Ions_xyz/1b3a1g.xyz
- Acid-Base-Ions_xyz/1b3a1n.xyz
- Acid-Base-Ions_xyz/2A4D1P.xyz
- Acid-Base-Ions_xyz/1b2a2n.xyz
- Acid-Base-Ions_xyz/4a2g.xyz
- Acid-Base-Ions_xyz/1B2A1D.xyz
- Acid-Base-Ions_xyz/1g.xyz
- Acid-Base-Ions_xyz/1a5n1p.xyz
- Acid-Base-Ions_xyz/1b2n.xyz
- Acid-Base-Ions_xyz/1a2n1p.xyz
- Acid-Base-Ions_xyz/4a4n.xyz
- Acid-Base-Ions_xyz/2a1g.xyz
- Acid-Base-Ions_xyz/2a1n1p.xyz
- Acid-Base-Ions_xyz/1b2a3g.xyz
- Acid-Base-Ions_xyz/1a2g1p.xyz
- Acid-Base-Ions_xyz/1B1A2D.xyz
- Acid-Base-Ions_xyz/4D1P.xyz
- Acid-Base-Ions_xyz/4a5n1p.xyz
- Acid-Base-Ions_xyz/3a1g.xyz
- Acid-Base-Ions_xyz/1B3A3D.xyz
- Acid-Base-Ions_xyz/3a3g1p.xyz
- Acid-Base-Ions_xyz/3a5n1p.xyz
- Acid-Base-Ions_xyz/3a3g.xyz
- Acid-Base-Ions_xyz/1a1n.xyz
- Acid-Base-Ions_xyz/2A3D1P.xyz
- Acid-Base-Ions_xyz/1b1a1g.xyz
- Acid-Base-Ions_xyz/1B2D.xyz
- Acid-Base-Ions_xyz/1b2a1g.xyz
- Acid-Base-Ions_xyz/4g1p.xyz
- Acid-Base-Ions_xyz/3D.xyz
- Acid-Base-Ions_xyz/1b1a2g.xyz
- Acid-Base-Ions_xyz/3a5g1p.xyz
- Acid-Base-Ions_xyz/1b4a2g.xyz
- Acid-Base-Ions_xyz/3a1n.xyz
- Acid-Base-Ions_xyz/4A3D.xyz
- Acid-Base-Ions_xyz/1b4a1n.xyz
- Acid-Base-Ions_xyz/1b3a3g.xyz
- Acid-Base-Ions_xyz/4A.xyz
- Acid-Base-Ions_xyz/2g.xyz
- Acid-Base-Ions_xyz/1b1a1n.xyz
- Acid-Base-Ions_xyz/1b4a4n.xyz
- Acid-Base-Ions_xyz/1B3A.xyz
- Acid-Base-Ions_xyz/3A3D1P.xyz
- Acid-Base-Ions_xyz/2a3g.xyz
- Acid-Base-Ions_xyz/5n1p.xyz
- Acid-Base-Ions_xyz/4D.xyz
- Acid-Base-Ions_xyz/4a3g.xyz
- Acid-Base-Ions_xyz/1b2g.xyz
- Acid-Base-Ions_xyz/1b3a2n.xyz
- Acid-Base-Ions_xyz/4a4n1p.xyz
- Acid-Base-Ions_xyz/2a3n.xyz
- Acid-Base-Ions_xyz/1a4g1p.xyz
- Acid-Base-Ions_xyz/1a1g1p.xyz
- Acid-Base-Ions_xyz/4A5D1P.xyz
- Acid-Base-Ions_xyz/3A.xyz
- Acid-Base-Ions_xyz/1b2a3n.xyz
- acp-19-9753-2019-supplement-title-page.pdf
