# Supplementary material for: Role of base strength, cluster structure and charge in sulfuric-acid-driven particle formation
Source: Copernicus journal article supplement (doi:10.5194/acp-19-9753-2019), 2019-08-02
Supplement: Supplementary file 1 [file acp-19-9753-2019-supplement.zip › Acid-Base-Ions_xyz/1A.xyz]

7
1a.log	Energy: -439335.7043230
S          0.00000        0.00000       -0.16212
O          0.64537       -1.09467       -0.83231
O         -0.64537        1.09468       -0.83229
O         -1.04905       -0.67262        0.85237
H         -1.69001       -0.00413        1.13631
O          1.04905        0.67260        0.85239
H          1.69000        0.00410        1.13632
