# Supplementary material for: Role of base strength, cluster structure and charge in sulfuric-acid-driven particle formation
Source: Copernicus journal article supplement (doi:10.5194/acp-19-9753-2019), 2019-08-02
Supplement: Supplementary file 1 [file acp-19-9753-2019-supplement.zip › Acid-Base-Ions_xyz/1A1D.xyz]

17
1A1D.log	Energy: -524160.5586370
H          1.23154       -0.06294        0.81499
S         -1.28980       -0.14316        0.01133
O         -1.89793        1.37782        0.02518
O         -0.43160       -0.20212       -1.20722
O         -2.43686       -1.03300       -0.00998
O         -0.45284       -0.15942        1.23469
H         -2.76088        1.34267       -0.40774
N          1.90211       -0.00907        0.01237
H          1.18101       -0.07736       -0.75460
C          2.80209       -1.17633       -0.00595
H          3.45851       -1.14714        0.86533
H          3.39894       -1.16040       -0.91933
H          2.19445       -2.08106        0.01972
C          2.56573        1.30761       -0.01859
H          3.22196        1.40701        0.84751
H          1.79650        2.07958        0.00966
H          3.14684        1.39975       -0.93741
