# Supplementary material for: Role of base strength, cluster structure and charge in sulfuric-acid-driven particle formation
Source: Copernicus journal article supplement (doi:10.5194/acp-19-9753-2019), 2019-08-02
Supplement: Supplementary file 1 [file acp-19-9753-2019-supplement.zip › Acid-Base-Ions_xyz/1A1D1P.xyz]

18
1A1D1P.log	Energy: -524386.1729296
H         -2.56156       -0.09106       -1.42270
S          1.33613        0.00601       -0.02346
O          2.47266       -0.53204       -0.98485
O          1.06847        1.35956       -0.41840
O          2.00606       -0.05608        1.41311
O          0.25582       -0.96618        0.04058
H          2.63222       -1.48212       -0.85826
H          2.65421        0.65882        1.52980
N         -2.38329       -0.09120       -0.41666
H         -1.43361       -0.48975       -0.28973
C         -3.37972       -0.96863        0.26354
H         -4.37723       -0.55444        0.11793
H         -3.13906       -1.00242        1.32569
H         -3.31933       -1.96939       -0.16281
C         -2.36849        1.31766        0.07817
H         -3.34373        1.76897       -0.10318
H         -1.58549        1.86591       -0.44548
H         -2.15627        1.30154        1.14701
