# Supplementary material for: Role of base strength, cluster structure and charge in sulfuric-acid-driven particle formation
Source: Copernicus journal article supplement (doi:10.5194/acp-19-9753-2019), 2019-08-02
Supplement: Supplementary file 1 [file acp-19-9753-2019-supplement.zip › Acid-Base-Ions_xyz/1a1g.xyz]

16
1a1g.log	Energy: -568215.3634102
C         -2.47687        0.00002        0.00209
N         -1.80435        1.13771        0.06979
H         -0.77282        1.14046        0.26458
H         -2.27728        2.01704       -0.05432
N         -3.83396        0.01268       -0.03954
H         -4.33092        0.88721       -0.03055
H         -4.32885       -0.78687       -0.39768
N         -1.83710       -1.15959       -0.00812
H         -0.78907       -1.20029       -0.04693
H         -2.34831       -2.01551        0.12968
S          1.64793       -0.03377        0.12149
O          0.80591        1.07108        0.63326
O          2.90008       -0.26882        0.81923
O          0.83759       -1.25508       -0.12595
O          2.05564        0.51438       -1.37079
H          2.87575        0.07010       -1.62202
