# Supplementary material for: Role of base strength, cluster structure and charge in sulfuric-acid-driven particle formation
Source: Copernicus journal article supplement (doi:10.5194/acp-19-9753-2019), 2019-08-02
Supplement: Supplementary file 1 [file acp-19-9753-2019-supplement.zip › Acid-Base-Ions_xyz/1a1g1p.xyz]

17
1a1g1p.log	Energy: -568447.3021285
S          1.63688        0.00000       -0.00000
O          0.91381        1.18443        0.40265
O          0.91382       -1.18442       -0.40269
O          2.61618       -0.46752        1.15287
O          2.61623        0.46752       -1.15283
H          3.03791       -0.29040       -1.59130
H          3.03786        0.29039        1.59134
C         -2.68516       -0.00000       -0.00000
N         -4.02430       -0.00000        0.00001
H         -4.54825       -0.84428       -0.16658
H         -4.54826        0.84427        0.16660
N         -2.02312        1.15451        0.00251
H         -2.50446        2.02563       -0.15496
H         -1.01808        1.19515        0.15663
N         -2.02311       -1.15451       -0.00251
H         -2.50445       -2.02563        0.15496
H         -1.01807       -1.19514       -0.15665
