# Supplementary material for: Role of base strength, cluster structure and charge in sulfuric-acid-driven particle formation
Source: Copernicus journal article supplement (doi:10.5194/acp-19-9753-2019), 2019-08-02
Supplement: Supplementary file 1 [file acp-19-9753-2019-supplement.zip › Acid-Base-Ions_xyz/1a1n.xyz]

11
1a1n.log	Energy: -474838.0760329
N         -2.76637        0.04028       -0.05169
H         -3.45814       -0.68572       -0.20829
H         -1.37627       -0.23310       -0.72684
H         -3.18715        0.93522       -0.28005
H         -2.52471        0.04517        0.93718
S          0.61576       -0.11692        0.09126
O         -0.06159       -0.14377        1.36892
O         -0.40627       -0.43752       -1.04956
O          0.94717        1.44786       -0.15949
O          1.82297       -0.86434       -0.15848
H          1.64048        1.50927       -0.83157
