# Supplementary material for: Role of base strength, cluster structure and charge in sulfuric-acid-driven particle formation
Source: Copernicus journal article supplement (doi:10.5194/acp-19-9753-2019), 2019-08-02
Supplement: Supplementary file 1 [file acp-19-9753-2019-supplement.zip › Acid-Base-Ions_xyz/1a1n1p.xyz]

12
1a1n1p.log	Energy: -475055.9393612
H          3.70810       -0.52588        0.83522
S         -0.65482       -0.03348        0.09665
O         -1.57307       -0.87504       -0.88522
O         -1.11556       -0.18372        1.44867
O         -0.86071        1.44464       -0.43303
O          0.71790       -0.33313       -0.26854
H         -2.23892       -1.37240       -0.38237
H         -1.70709        1.81846       -0.13684
N          3.37225       -0.02935        0.00798
H          2.32343       -0.08219       -0.03673
H          3.76486       -0.46485       -0.82895
H          3.67251        0.94589        0.05245
