# Supplementary material for: Role of base strength, cluster structure and charge in sulfuric-acid-driven particle formation
Source: Copernicus journal article supplement (doi:10.5194/acp-19-9753-2019), 2019-08-02
Supplement: Supplementary file 1 [file acp-19-9753-2019-supplement.zip › Acid-Base-Ions_xyz/1A2D.xyz]

27
1A2D.log	Energy: -608975.2536849
S          0.03563       -0.70066       -0.06340
O         -0.77492        0.20545       -1.09635
O         -0.89826       -1.67933        0.48939
O          0.57729        0.24266        0.97235
O          1.15139       -1.26171       -0.87164
H         -1.73472        0.29664       -0.74178
H          2.59125       -0.41365       -0.53059
C          4.17051       -0.09223        0.81975
H          4.98315       -0.38226        0.15119
H          3.86086       -0.95079        1.41593
H          4.50516        0.71080        1.47888
N          3.01761        0.36738        0.02910
C          3.26194        1.53180       -0.84083
H          2.16713        0.54185        0.63672
H          4.04479        1.29330       -1.56301
H          2.33428        1.76404       -1.36509
H          3.56620        2.38506       -0.23215
N         -3.15404        0.21394        0.05036
C         -4.38470        0.39845       -0.70907
C         -3.06819        1.05866        1.24030
H         -3.04770       -0.75980        0.32930
H         -4.41930        1.42061       -1.09867
H         -4.39685       -0.29029       -1.55701
H         -5.28760        0.23147       -0.10259
H         -3.04886        2.10928        0.93410
H         -3.91678        0.91138        1.92453
H         -2.13744        0.83699        1.76765
