# Supplementary material for: Role of base strength, cluster structure and charge in sulfuric-acid-driven particle formation
Source: Copernicus journal article supplement (doi:10.5194/acp-19-9753-2019), 2019-08-02
Supplement: Supplementary file 1 [file acp-19-9753-2019-supplement.zip › Acid-Base-Ions_xyz/1A2D1P.xyz]

28
1A2D1P.log	Energy: -609230.4880842
S          0.09076       -0.19128       -0.14059
O         -0.89378        0.86146        0.15836
O          0.94624        0.06873       -1.30957
O          0.85839       -0.66876        1.02086
N          3.34816        0.14730        0.08330
H          2.74866        0.17755       -0.76115
H          2.70230       -0.29874        0.75876
C          4.55107       -0.68972       -0.14181
C          3.63160        1.53634        0.52668
H          5.16677       -0.22866       -0.91429
H          5.11491       -0.76159        0.78841
H          4.23546       -1.68217       -0.46212
H          4.22888        2.03816       -0.23461
H          4.17627        1.50513        1.47035
H          2.68355        2.05703        0.65991
N         -3.43570        0.05572       -0.09441
H         -3.31485       -0.71429       -0.75495
H         -2.47141        0.47122       -0.01058
C         -3.81581       -0.49573        1.23230
C         -4.38290        1.05966       -0.64106
H         -5.36756        0.60619       -0.75834
H         -4.01073        1.40767       -1.60417
H         -4.43942        1.89702        0.05427
H         -4.78744       -0.98516        1.15968
H         -3.05128       -1.20841        1.54026
H         -3.86191        0.32559        1.94714
O         -0.92160       -1.41619       -0.56659
H         -0.40955       -2.19239       -0.83249
