# Supplementary material for: Role of base strength, cluster structure and charge in sulfuric-acid-driven particle formation
Source: Copernicus journal article supplement (doi:10.5194/acp-19-9753-2019), 2019-08-02
Supplement: Supplementary file 1 [file acp-19-9753-2019-supplement.zip › Acid-Base-Ions_xyz/1a2g.xyz]

25
1a2g.log	Energy: -697086.3280480
C          2.68048       -0.91003       -0.14089
N          3.04695        0.34158       -0.07502
N          3.39454       -1.95817        0.39313
N          1.51537       -1.27008       -0.73519
H          3.99707        0.44059        0.26920
H          0.90505       -0.53397       -1.07351
H          0.97575       -2.02777       -0.33093
H          4.32622       -1.77327        0.72636
H          3.25171       -2.87241       -0.00702
C          0.24713        2.15414        0.15437
N         -0.99134        2.65602       -0.00399
N          0.52182        1.42841        1.24049
N          1.23519        2.43452       -0.69762
H         -1.71132        2.11126        0.47383
H          1.02184        2.91159       -1.55774
H          2.06077        1.80762       -0.64939
H         -0.26534        0.94482        1.66935
H          1.43084        0.97395        1.25030
S         -1.79176       -0.73941        0.01061
O         -2.07337        0.22478        1.10904
O         -1.13661       -1.96744        0.47741
O         -3.25375       -1.18223       -0.56030
H         -3.68118       -1.72294        0.11722
O         -1.16335       -0.10195       -1.15629
H         -1.24994        2.89504       -0.94968
