# Supplementary material for: Role of base strength, cluster structure and charge in sulfuric-acid-driven particle formation
Source: Copernicus journal article supplement (doi:10.5194/acp-19-9753-2019), 2019-08-02
Supplement: Supplementary file 1 [file acp-19-9753-2019-supplement.zip › Acid-Base-Ions_xyz/1a2g1p.xyz]

26
1a2g1p.log	Energy: -697347.2146767
C          4.21265        0.31653       -0.35197
N          5.53747        0.49346       -0.22307
N          3.71159       -0.90360       -0.51692
N          3.38860        1.35882       -0.32227
H          6.17933       -0.27514       -0.32478
H          5.93034        1.40626       -0.06367
H          3.73291        2.30315       -0.28052
H          2.38336        1.18152       -0.38873
H          2.69678       -1.00127       -0.58942
H          4.28619       -1.72430       -0.42378
C         -4.19866        0.28082       -0.28514
N         -3.60243       -0.76962       -0.83572
N         -5.50232        0.51379       -0.52419
N         -3.51377        1.10239        0.50250
H         -4.07184       -1.31397       -1.54064
H         -2.49272        1.01556        0.61260
H         -3.98663        1.82083        1.02570
H         -6.07448       -0.16354       -1.00032
H         -5.94223        1.37040       -0.23191
S         -0.05778       -0.35614        0.33039
O         -0.73949        0.86477        0.79355
O          1.04523       -0.09860       -0.61420
O          0.76007       -0.95717        1.59937
H          0.13621       -1.24927        2.27844
O         -0.99518       -1.40869       -0.09287
H         -2.63574       -1.02525       -0.58561
