# Supplementary material for: Role of base strength, cluster structure and charge in sulfuric-acid-driven particle formation
Source: Copernicus journal article supplement (doi:10.5194/acp-19-9753-2019), 2019-08-02
Supplement: Supplementary file 1 [file acp-19-9753-2019-supplement.zip › Acid-Base-Ions_xyz/1a2n.xyz]

15
1a2n.log	Energy: -510338.3142828
N         -3.08233       -0.90342       -0.01451
H         -3.05764       -0.09564        0.60515
H         -3.22829       -1.73413        0.54926
H         -3.87136       -0.80154       -0.64399
N          3.08233       -0.90341        0.01451
H          3.87137       -0.80152        0.64398
H          3.05764       -0.09565       -0.60517
H          3.22829       -1.73414       -0.54924
S          0.00000        0.49151        0.00000
O          1.03881        1.20725       -0.71448
O         -1.03882        1.20724        0.71448
O         -0.67743       -0.48643       -1.03835
O          0.67744       -0.48642        1.03835
H          1.61065       -0.74338        0.70014
H         -1.61065       -0.74338       -0.70014
