# Supplementary material for: Role of base strength, cluster structure and charge in sulfuric-acid-driven particle formation
Source: Copernicus journal article supplement (doi:10.5194/acp-19-9753-2019), 2019-08-02
Supplement: Supplementary file 1 [file acp-19-9753-2019-supplement.zip › Acid-Base-Ions_xyz/1a2n1p.xyz]

16
1a2n1p.log	Energy: -510575.6850023
S          0.00124       -0.45701       -0.10655
O          0.00022       -1.41296        1.19207
O          0.00307        0.89635        0.49734
O         -1.23730       -0.75015       -0.85132
O          1.23747       -0.75410       -0.85284
H          0.00068       -2.34324        0.91919
N         -2.83153        1.17690        0.04126
H         -3.54628        0.91040        0.71734
H         -2.03069        1.61156        0.51852
H         -2.40742        0.32139       -0.42391
H         -3.22519        1.81408       -0.64981
N          2.82729        1.17983        0.04148
H          2.01750        1.60292        0.51523
H          2.41530        0.32151       -0.42683
H          3.21650        1.82300       -0.64655
H          3.54181        0.92031        0.72050
