# Supplementary material for: Role of base strength, cluster structure and charge in sulfuric-acid-driven particle formation
Source: Copernicus journal article supplement (doi:10.5194/acp-19-9753-2019), 2019-08-02
Supplement: Supplementary file 1 [file acp-19-9753-2019-supplement.zip › Acid-Base-Ions_xyz/1A3D.xyz]

37
1A3D.log	Energy: -693791.6293149
S          0.64686       -0.12345       -0.47631
O          1.87639        0.28080       -1.39880
O         -0.46188       -0.41592       -1.40580
O          0.33164        1.08688        0.35753
O          1.07684       -1.25751        0.35719
H          2.73067        0.14720       -0.85025
H         -2.60136        0.38628        0.18599
C         -2.59286        1.96461       -1.17079
H         -3.67069        1.93901       -1.34883
H         -2.06654        1.34894       -1.90152
H         -2.23319        2.99379       -1.23029
N         -2.29600        1.41427        0.16473
C         -2.89629        2.15173        1.28563
H         -1.23969        1.36427        0.27805
H         -3.98483        2.14743        1.19286
H         -2.60681        1.66828        2.21963
H         -2.53422        3.18181        1.28667
N          3.87582       -0.21206        0.26687
C          5.20545       -0.59603       -0.18940
C          3.88422        0.84499        1.27559
H          3.37513       -1.01914        0.63511
H          5.86356       -0.91248        0.63426
H          5.12198       -1.41437       -0.90843
H          5.67474        0.25454       -0.69354
H          4.47986        0.57928        2.16188
H          4.30398        1.75591        0.83746
H          2.85576        1.05414        1.57947
N         -2.78541       -1.30899        0.11588
C         -4.04588       -1.89183       -0.32615
C         -2.27434       -1.90814        1.34882
H         -2.06976       -1.40642       -0.60792
H         -4.82791       -1.68411        0.41233
H         -4.34527       -1.44498       -1.27814
H         -3.98588       -2.98266       -0.45788
H         -2.93466       -1.65115        2.18494
H         -2.21097       -3.00410        1.28547
H         -1.27031       -1.52478        1.54812
