# Supplementary material for: Role of base strength, cluster structure and charge in sulfuric-acid-driven particle formation
Source: Copernicus journal article supplement (doi:10.5194/acp-19-9753-2019), 2019-08-02
Supplement: Supplementary file 1 [file acp-19-9753-2019-supplement.zip › Acid-Base-Ions_xyz/1A3D1P.xyz]

38
1A3D1P.log	Energy: -694058.7060610
S          0.00000        0.14057       -0.00001
O          0.51887        1.00084        1.11082
O         -1.12649       -0.73952        0.50481
O         -0.51887        1.00071       -1.11094
N         -2.90450        1.35821        0.06409
H         -2.70737        0.41535        0.43934
H         -2.10175        1.44505       -0.61055
C         -4.21307        1.41468       -0.62018
C         -2.71864        2.35228        1.15035
H         -5.01032        1.23676        0.10263
H         -4.33795        2.40044       -1.06926
H         -4.23853        0.65214       -1.39837
H         -3.47691        2.19443        1.91819
H         -2.81550        3.35443        0.73154
H         -1.71922        2.21397        1.56642
N          2.90450        1.35819       -0.06425
H          2.70738        0.41529       -0.43940
H          2.10175        1.44512        0.61037
C          2.71864        2.35214       -1.15063
C          4.21307        1.41474        0.62001
H          5.01033        1.23674       -0.10278
H          4.23853        0.65229        1.39829
H          4.33795        2.40056        1.06897
H          3.47691        2.19421       -1.91846
H          1.71923        2.21378       -1.56669
H          2.81550        3.35434       -0.73194
O          1.12649       -0.73958       -0.50473
H          0.71355       -2.43978       -0.33117
N         -0.00000       -3.12753        0.00019
C          0.52217       -3.92021        1.13344
C         -0.52218       -3.92033       -1.13297
H         -0.71355       -2.43974        0.33148
H          1.34937       -4.54279        0.79021
H          0.86839       -3.23342        1.90579
H         -0.27335       -4.55152        1.53110
H          0.27334       -4.55169       -1.53055
H         -1.34938       -4.54287       -0.78966
H         -0.86839       -3.23363       -1.90539
