# Supplementary material for: Role of base strength, cluster structure and charge in sulfuric-acid-driven particle formation
Source: Copernicus journal article supplement (doi:10.5194/acp-19-9753-2019), 2019-08-02
Supplement: Supplementary file 1 [file acp-19-9753-2019-supplement.zip › Acid-Base-Ions_xyz/1a3g.xyz]

34
1a3g.log	Energy: -825955.8971587
C         -3.30868       -0.86204       -0.52229
N         -3.36839       -0.64285        0.75649
N         -4.40406       -0.99416       -1.34799
N         -2.09966       -0.87211       -1.15489
H         -4.31945       -0.69373        1.10733
H         -1.26712       -1.13315       -0.62876
H         -2.05998       -1.14706       -2.12348
H         -5.30443       -1.09001       -0.90750
H         -4.30328       -1.49909       -2.21441
C          0.76531        2.48318       -1.01611
N          0.06241        3.36919       -0.36568
N          2.11087        2.57073       -1.29754
N          0.16137        1.36628       -1.50372
H          0.60378        4.20803       -0.17566
H         -0.80573        1.21731       -1.25815
H          0.71728        0.53048       -1.63015
H          2.62884        3.24287       -0.75388
H          2.58983        1.68326       -1.41294
C         -0.51767        0.81626        1.79465
N         -0.80879       -0.44248        2.13008
N          0.73936        1.26763        1.92404
N         -1.48517        1.64956        1.39616
H         -0.03051       -1.09075        2.19184
H         -2.37447        1.20680        1.17637
H         -1.18609        2.47258        0.85296
H          1.47493        0.56268        1.90572
H          0.93353        2.16036        1.49100
S          1.89645       -1.44216       -0.08353
O          1.94340       -1.26604        1.38700
O          2.61063       -0.37741       -0.81017
O          2.70098       -2.82274       -0.38563
H          3.60809       -2.71283       -0.07032
O          0.55599       -1.73199       -0.60818
H         -1.72577       -0.78472        1.82613
