# Supplementary material for: Role of base strength, cluster structure and charge in sulfuric-acid-driven particle formation
Source: Copernicus journal article supplement (doi:10.5194/acp-19-9753-2019), 2019-08-02
Supplement: Supplementary file 1 [file acp-19-9753-2019-supplement.zip › Acid-Base-Ions_xyz/1a3g1p.xyz]

35
1a3g1p.log	Energy: -826229.1649133
S          0.24407       -0.00000       -0.00000
O         -0.67385        0.00043        1.21203
O          1.07187       -1.23592        0.00773
O         -0.67386       -0.00042       -1.21203
O          1.07187        1.23592       -0.00775
C         -2.36246        2.93564       -0.03711
N         -2.00770        2.39446       -1.19681
H         -1.95197        2.97987       -2.01444
H         -1.51054        1.47931       -1.23255
N         -2.20596        2.27076        1.10037
H         -1.62770        1.40424        1.15406
H         -2.49904        2.68986        1.96750
N         -2.90916        4.17118       -0.02267
H         -3.21903        4.60417       -0.87649
H         -3.20736        4.59492        0.83962
C          4.41257       -0.00000        0.00000
N          3.75190        1.07707        0.40231
H          2.71976        1.14867        0.27959
H          4.23956        1.82797        0.86177
N          5.76294       -0.00000        0.00000
H          6.28294        0.84954        0.13980
H          6.28294       -0.84955       -0.13978
N          3.75190       -1.07707       -0.40231
H          2.71976       -1.14868       -0.27960
H          4.23956       -1.82798       -0.86176
C         -2.36246       -2.93564        0.03712
N         -2.20598       -2.27076       -1.10036
H         -1.62771       -1.40423       -1.15406
H         -2.49908       -2.68984       -1.96749
N         -2.90917       -4.17117        0.02268
H         -3.20737       -4.59491       -0.83961
H         -3.21903       -4.60417        0.87650
N         -2.00769       -2.39447        1.19681
H         -1.51053       -1.47931        1.23255
H         -1.95195       -2.97988        2.01444
