# Supplementary material for: Role of base strength, cluster structure and charge in sulfuric-acid-driven particle formation
Source: Copernicus journal article supplement (doi:10.5194/acp-19-9753-2019), 2019-08-02
Supplement: Supplementary file 1 [file acp-19-9753-2019-supplement.zip › Acid-Base-Ions_xyz/1a3n.xyz]

19
1a3n.log	Energy: -545837.2866621
S         -1.11407       -0.05499       -0.01140
O         -2.67213       -0.51646        0.06995
O         -0.57961       -0.21440        1.36826
O         -1.13037        1.35302       -0.44116
O         -0.53101       -0.99638       -0.96993
H         -3.15497        0.16648        0.55383
N          2.10398        0.13569        1.10765
H          2.72886        0.22698        1.90211
H          1.10726        0.01171        1.41298
H          2.11784        1.00334        0.50138
H          2.33398       -0.71658        0.52462
N          2.15838       -2.13106       -0.55305
H          2.69693       -2.18592       -1.41150
H          2.18304       -3.04992       -0.12227
H          1.18395       -1.93543       -0.80851
N          1.66162        2.35815       -0.58019
H          0.65218        2.17917       -0.64006
H          2.02874        2.32694       -1.52629
H          1.78453        3.30730       -0.24175
