# Supplementary material for: Role of base strength, cluster structure and charge in sulfuric-acid-driven particle formation
Source: Copernicus journal article supplement (doi:10.5194/acp-19-9753-2019), 2019-08-02
Supplement: Supplementary file 1 [file acp-19-9753-2019-supplement.zip › Acid-Base-Ions_xyz/1a3n1p.xyz]

20
1a3n1p.log	Energy: -546080.7872105
S         -0.00647       -0.00273        0.10350
O          0.25006        1.22148        0.90377
O          1.03013       -0.04190       -1.06207
O          0.14857       -1.24797        0.89784
O         -1.34412        0.05283       -0.56215
N         -1.61732        2.78485       -0.08793
H         -0.77977        2.38804        0.44042
H         -2.31963        3.15523        0.54937
H         -1.96822        1.94571       -0.57807
H         -1.33342        3.50052       -0.75442
N          3.41966       -0.10986       -0.09362
H          2.02249       -0.07167       -0.68237
H          3.51450        0.61014        0.61819
H          4.14952        0.03961       -0.78485
H          3.59708       -1.00450        0.35534
N         -1.83188       -2.66025       -0.08873
H         -1.60080       -3.39729       -0.75236
H         -2.55440       -2.97880        0.55400
H         -0.96500       -2.31795        0.43423
H         -2.12925       -1.80411       -0.58276
