# Supplementary material for: Role of base strength, cluster structure and charge in sulfuric-acid-driven particle formation
Source: Copernicus journal article supplement (doi:10.5194/acp-19-9753-2019), 2019-08-02
Supplement: Supplementary file 1 [file acp-19-9753-2019-supplement.zip › Acid-Base-Ions_xyz/1A4D.xyz]

47
1A4D.log	Energy: -778605.6325324
S         -0.00013        0.00092        0.73395
O          1.21761        0.24857        1.55398
O          0.25251       -1.20113       -0.16981
O         -0.25331        1.20416       -0.16801
O         -1.21745       -0.24799        1.55430
N         -2.83127        1.47029       -0.31208
H         -3.14622        0.45286       -0.31473
H         -1.74738        1.40341       -0.28928
C         -3.27829        2.15187       -1.53229
H         -4.37045        2.17564       -1.57379
H         -2.89226        1.61182       -2.39822
H         -2.89186        3.17339       -1.54659
C         -3.27641        2.09444        0.94549
H         -4.36861        2.09274        0.99840
H         -2.84678        1.51348        1.76324
H         -2.90668        3.12107        0.99325
C          4.59165        1.80584        0.38451
H          4.52141        2.87630        0.63470
H          4.88743        1.26153        1.28580
H          5.38365        1.68743       -0.36399
C          2.82633        1.98795       -1.28461
H          2.76870        3.07335       -1.10771
H          3.47730        1.81898       -2.15106
H          1.81721        1.62939       -1.50297
N         -3.34027       -1.26441       -0.12804
H         -2.62099       -1.25761        0.60300
C         -2.82562       -1.99037       -1.28502
H         -2.76698       -3.07539       -1.10611
H         -1.81707       -1.63147       -1.50540
H         -3.47787       -1.82351       -2.15090
C         -4.58894       -1.80617        0.38597
H         -5.38199       -1.68937       -0.36166
H         -4.88373       -1.26049        1.28677
H         -4.51785       -2.87617        0.63787
N          2.83034       -1.47047       -0.31136
H          1.74656       -1.40227       -0.28958
C          3.27357       -2.09630        0.94605
H          4.36572       -2.09596        0.99996
H          2.90258       -3.12253        0.99253
H          2.84393       -1.51554        1.76394
C          3.27773       -2.15144       -1.53178
H          4.36989       -2.17678       -1.57207
H          2.89348       -1.60990       -2.39757
H          2.88980       -3.17237       -1.54758
N          3.34208        1.26380       -0.12696
H          2.62358        1.25852        0.60481
H          3.14642       -0.45344       -0.31286
