# Supplementary material for: Role of base strength, cluster structure and charge in sulfuric-acid-driven particle formation
Source: Copernicus journal article supplement (doi:10.5194/acp-19-9753-2019), 2019-08-02
Supplement: Supplementary file 1 [file acp-19-9753-2019-supplement.zip › Acid-Base-Ions_xyz/1A4D1P.xyz]

48
1A4D1P.log	Energy: -778877.7735937
S          0.53884        0.05896       -0.17626
O         -0.04372        0.25763       -1.53845
O          2.05910        0.10215       -0.26585
O          0.09440        1.17155        0.73601
O          0.11635       -1.27221        0.37914
N         -2.72336        0.36001        1.37428
H         -1.80362        0.80795        1.37963
C         -3.75516        1.33265        1.72939
H         -3.70165        2.18995        1.05323
H         -4.74438        0.87497        1.62751
H         -3.65476        1.69593        2.76161
C         -2.68308       -0.78891        2.28093
H         -3.60806       -1.36748        2.18486
H         -1.83382       -1.41894        2.00738
H         -2.57810       -0.48759        3.33242
C          3.21440       -2.97770        1.44610
N          2.49235       -2.49667        0.25104
C          2.65686       -3.32717       -0.96125
H          1.47382       -2.35455        0.44904
H          4.28478       -3.00554        1.23778
H          3.01512       -2.29546        2.27239
H          2.86444       -3.97845        1.70260
H          3.71277       -3.37124       -1.23103
H          2.28353       -4.33310       -0.76511
H          2.08717       -2.86884       -1.76995
H          2.72815       -1.50277        0.03185
C          2.87437        3.72428        0.78136
N          2.05971        2.82370       -0.05896
C          1.67362        3.37068       -1.38218
H          2.51525        1.90111       -0.20206
H          2.31569        4.64139        0.97152
H          3.09281        3.22519        1.72529
H          3.80420        3.96256        0.26326
H          1.08305        4.27570       -1.23516
H          2.57358        3.60274       -1.95296
H          1.08203        2.61311       -1.89915
H          1.19415        2.49586        0.43360
C         -3.66617        0.14569       -2.06421
N         -2.65799       -0.51405       -1.21535
C         -2.71981       -1.98882       -1.22178
H         -1.69315       -0.21431       -1.48934
H         -4.66628       -0.12443       -1.71972
H         -3.53599        1.22602       -1.99184
H         -3.54184       -0.16579       -3.10296
H         -3.68450       -2.31404       -0.82716
H         -2.59694       -2.36046       -2.24104
H         -1.90911       -2.35600       -0.59165
H         -2.75404       -0.16489       -0.18852
