# Supplementary material for: Role of base strength, cluster structure and charge in sulfuric-acid-driven particle formation
Source: Copernicus journal article supplement (doi:10.5194/acp-19-9753-2019), 2019-08-02
Supplement: Supplementary file 1 [file acp-19-9753-2019-supplement.zip › Acid-Base-Ions_xyz/1a4g.xyz]

43
1a4g.log	Energy: -954823.1563067
C         -3.59864       -0.69449        1.05590
N         -3.98331        0.29569        1.80835
N         -3.24419       -1.94965        1.49608
N         -3.56492       -0.54311       -0.30066
H         -4.06612        0.01234        2.78044
H         -3.72272        0.39387       -0.63481
H         -2.90908       -1.11486       -0.82092
H         -2.98121       -2.01118        2.46676
H         -2.64750       -2.48276        0.87090
C         -1.85072        2.50908        0.17110
N         -1.23163        3.05414       -0.84553
N         -3.08954        2.85689        0.63377
N         -1.22749        1.53998        0.90115
H          0.80615        2.93015       -0.70235
H         -0.53093        0.97313        0.43358
H         -1.82265        1.01472        1.52888
H         -3.62503        3.51015        0.08664
H         -3.61025        2.14675        1.16288
C          3.81539        0.25266        1.58513
N          3.95102        1.11167        0.62017
N          4.78635       -0.03124        2.52987
N          2.67158       -0.46802        1.72805
H          4.82407        1.62480        0.69571
H          1.95626       -0.42367        1.00647
H          2.72523       -1.36047        2.19275
H          5.57177        0.59915        2.56617
H          4.46316       -0.32903        3.43835
C          1.48803        1.31749       -1.68747
N          1.64525        2.37278       -0.88347
N          2.48028        0.42769       -1.82070
N          0.36360        1.20091       -2.40308
H          2.39647        2.30800       -0.20012
H         -0.41152        1.79670       -2.08827
H          0.16330        0.28444       -2.78472
H          3.21469        0.48872       -1.11059
H          2.21001       -0.49001       -2.15792
S          0.00893       -2.00103       -0.82265
O          0.54010       -1.75934       -2.17733
O         -1.38028       -2.48603       -0.81768
O          0.91135       -3.21825       -0.20217
H          0.81478       -3.98471       -0.78361
O          0.28011       -0.91552        0.13420
H         -1.79525        3.78093       -1.27585
