# Supplementary material for: Role of base strength, cluster structure and charge in sulfuric-acid-driven particle formation
Source: Copernicus journal article supplement (doi:10.5194/acp-19-9753-2019), 2019-08-02
Supplement: Supplementary file 1 [file acp-19-9753-2019-supplement.zip › Acid-Base-Ions_xyz/1a4g1p.xyz]

44
1a4g1p.log	Energy: -955093.3294293
C         -4.99108       -0.51656        0.04985
N         -4.55506       -0.09616       -1.12897
N         -4.13066       -0.78509        1.02686
N         -6.31189       -0.67649        0.26220
H         -3.54176       -0.07737       -1.33999
H         -5.19952        0.25772       -1.81658
H         -6.97180       -0.61370       -0.49482
H         -6.67663       -0.83639        1.18618
H         -4.44448       -1.25021        1.86253
H         -3.12474       -0.56513        0.94066
C          2.10749        3.24262       -0.53356
N          1.06732        3.25040        0.26145
N          2.84221        4.34140       -0.85092
N          2.52214        2.06009       -1.06697
H          0.87516        4.17139        0.64231
H          1.84896        1.29301       -1.01069
H          3.07136        2.08747       -1.91237
H          2.63042        5.22686       -0.42280
H          3.74127        4.25483       -1.29557
C          2.74004       -3.18593       -0.62807
N          3.14458       -2.74059        0.52851
N          3.30002       -4.25038       -1.29261
N          1.70175       -2.58953       -1.26937
H          3.86314       -3.33589        0.92882
H          1.31903       -1.71831       -0.91119
H          1.57949       -2.74045       -2.25728
H          3.96433       -4.81693       -0.79037
H          2.73666       -4.75445       -1.95984
C          1.65217       -0.10333        1.92005
N          0.98093        1.01345        2.23916
N          1.08254       -1.30221        2.09863
N          2.91450       -0.04890        1.50099
H         -0.01359        0.89075        2.38153
H          3.33336        0.84359        1.29462
H          3.27999       -0.90749        1.06478
H          0.07681       -1.32736        1.97583
H          1.61872       -2.08930        1.72594
S         -0.94735        0.32058       -0.47648
O         -1.40125       -0.18113        0.85917
O         -1.84426       -0.13268       -1.54979
O         -1.08261        1.89348       -0.44364
H         -0.22710        2.37569       -0.13764
O          0.48422        0.01808       -0.71182
H          1.20937        1.86770        1.72600
