# Supplementary material for: Role of base strength, cluster structure and charge in sulfuric-acid-driven particle formation
Source: Copernicus journal article supplement (doi:10.5194/acp-19-9753-2019), 2019-08-02
Supplement: Supplementary file 1 [file acp-19-9753-2019-supplement.zip › Acid-Base-Ions_xyz/1a4n.xyz]

23
1a4n.log	Energy: -581334.8255551
S         -0.57695       -0.50358       -0.14373
O          0.58372       -0.42430       -1.05220
O         -0.14583       -0.56759        1.28377
O         -1.59842       -1.49424       -0.48131
O         -1.26809        0.95566       -0.31368
N          2.25285        0.65208        1.32319
H          2.67209        0.95490        2.19587
H          2.84633       -0.05755        0.82407
H          2.06662        1.46234        0.67283
H          1.31524        0.18773        1.47645
N          1.34284        2.45760       -0.64296
H          0.34646        2.45943       -0.42432
H          1.60587        3.38244       -0.96524
H          1.42141        1.80491       -1.42061
N          3.25774       -1.41972       -0.31639
H          3.32078       -2.35118        0.08182
H          3.97533       -1.34445       -1.02952
H          2.34353       -1.33905       -0.77315
N         -3.81664        0.30755        0.34973
H         -3.57577       -0.65618        0.11799
H         -4.59729        0.59579       -0.22926
H         -4.10715        0.33954        1.32064
H         -2.23092        0.87984       -0.03543
