# Supplementary material for: Role of base strength, cluster structure and charge in sulfuric-acid-driven particle formation
Source: Copernicus journal article supplement (doi:10.5194/acp-19-9753-2019), 2019-08-02
Supplement: Supplementary file 1 [file acp-19-9753-2019-supplement.zip › Acid-Base-Ions_xyz/1a4n1p.xyz]

24
1a4n1p.log	Energy: -581584.5891933
N          2.63926        0.30751       -1.19468
H          1.85604        0.95098       -1.02466
H          2.88641        0.31221       -2.18152
H          3.48153        0.55148       -0.58884
N         -2.50615        2.35512        0.28589
H         -2.58635        2.62908        1.26124
H         -2.61682        3.19832       -0.26998
H         -1.55546        2.00336        0.14183
N          4.84428        0.88647        0.46096
H          5.27137        1.79680        0.31012
H          5.58501        0.19721        0.35802
H          4.55646        0.85766        1.43606
N         -3.81571        0.07752       -0.45420
H         -3.42910        1.05154       -0.15990
H         -4.52603       -0.24777        0.19795
H         -4.21170        0.10942       -1.39117
H         -2.98781       -0.56939       -0.43794
S         -0.24361       -0.76535        0.07497
O         -1.52633       -1.36108       -0.34029
O         -0.07770        0.65043       -0.31384
O          0.92158       -1.60276       -0.25217
O         -0.30147       -0.66256        1.69632
H         -0.32998       -1.55637        2.06780
H          2.24389       -0.61751       -0.92442
