# Supplementary material for: Role of base strength, cluster structure and charge in sulfuric-acid-driven particle formation
Source: Copernicus journal article supplement (doi:10.5194/acp-19-9753-2019), 2019-08-02
Supplement: Supplementary file 1 [file acp-19-9753-2019-supplement.zip › Acid-Base-Ions_xyz/1a5g1p.xyz]

53
1a5g1p.log	Energy: -1083968.3876163
C          2.42047       -2.47408        1.19585
N          1.45176       -3.24648        0.70434
N          2.16358       -1.26620        1.67606
N          3.68691       -2.93770        1.24389
H          0.57694       -2.83212        0.34496
H          1.66022       -4.19027        0.42261
H          3.93594       -3.82921        0.85104
H          4.37475       -2.45755        1.80001
H          2.90997       -0.55951        1.66041
H          1.21278       -0.88586        1.55657
C          1.32136        2.86219       -0.58536
N          0.20027        2.78471       -1.30205
N          1.49351        2.13999        0.51109
N          2.27643        3.74643       -0.94594
H         -0.40889        1.95373       -1.25666
H          2.31394        4.11173       -1.88246
H          3.09335        3.85336       -0.36760
H          0.77417        1.44080        0.75003
H          2.44767        1.88762        0.80373
C          4.57301        0.48381       -0.12731
N          4.08870        0.87402        1.02597
N          5.91618        0.40614       -0.41306
N          3.73697        0.09985       -1.11642
H          4.82072        1.18982        1.65515
H          2.73275       -0.01870       -0.94502
H          4.09988       -0.39606       -1.91391
H          6.55596        0.86590        0.21477
H          6.21047        0.39274       -1.37747
C         -4.12780        1.29314        1.60707
N         -5.12005        0.74207        0.96903
N         -4.18667        1.75915        2.89927
N         -2.90174        1.41995        1.02223
H         -5.99445        0.83294        1.47763
H         -2.77508        1.01843        0.09878
H         -2.08300        1.26774        1.59766
H         -5.08917        1.79675        3.34513
H         -3.55109        2.49761        3.15892
C         -3.85007       -1.35987       -1.29574
N         -3.11758       -1.93604       -2.26607
N         -3.61478       -1.68487       -0.02417
N         -4.85575       -0.53046       -1.57218
H         -2.21525       -2.28870       -1.95107
H         -5.05808       -0.27512       -2.52406
H         -5.18559        0.05660       -0.78682
H         -2.66952       -1.99501        0.19585
H         -4.14089       -1.16676        0.67396
S         -0.33196       -0.53463       -0.52068
O         -0.81881       -1.96485       -0.45609
O         -0.20508       -0.02682        0.90912
O          0.99838       -0.48657       -1.18146
H          0.04148        3.43561       -2.05329
O         -1.31734        0.33812       -1.23613
H         -3.08173       -1.45663       -3.15248
