# Supplementary material for: Role of base strength, cluster structure and charge in sulfuric-acid-driven particle formation
Source: Copernicus journal article supplement (doi:10.5194/acp-19-9753-2019), 2019-08-02
Supplement: Supplementary file 1 [file acp-19-9753-2019-supplement.zip › Acid-Base-Ions_xyz/1a5n1p.xyz]

28
1a5n1p.log	Energy: -617087.1516654
N         -3.01499       -1.67300        1.26495
H         -2.71519       -2.17336        2.09683
H         -4.02522       -1.58085        1.31865
H         -2.61042       -0.73551        1.31661
N          5.07941       -0.63596       -0.34384
H          4.85673       -0.54302       -1.33185
H          5.40241       -1.58987       -0.20536
H          5.87710       -0.03040       -0.16831
N         -1.84389        3.24225       -0.21155
H         -2.17133        3.95116        0.43771
H         -2.47850        3.22999       -1.00469
H         -0.93182        3.53206       -0.55675
H         -1.60750        1.79848        0.40643
N          2.78444        0.07912        1.15369
H          2.08180       -0.67607        1.17691
H          2.27584        0.82942        0.63817
H          3.01144        0.38012        2.09806
H          3.65746       -0.21287        0.62521
N         -1.81494       -2.50349       -1.06016
H         -2.36270       -2.28395       -0.15102
H         -0.98596       -3.04417       -0.82170
H         -2.38212       -3.00552       -1.73832
H         -1.48756       -1.57739       -1.43475
S         -0.19909        0.28024       -0.21541
O         -0.83458       -0.01184       -1.51992
O          0.84642        1.32506       -0.29818
O         -1.34147        0.85050        0.73727
O          0.26097       -0.95303        0.47122
