# Supplementary material for: Role of base strength, cluster structure and charge in sulfuric-acid-driven particle formation
Source: Copernicus journal article supplement (doi:10.5194/acp-19-9753-2019), 2019-08-02
Supplement: Supplementary file 1 [file acp-19-9753-2019-supplement.zip › Acid-Base-Ions_xyz/1B.xyz]

6
1B.log	Energy: -439017.7494487
O          0.24098       -0.83134       -1.23357
S          0.14844       -0.02963       -0.00000
O         -1.43853        0.53214        0.00001
O          0.90765        1.22267       -0.00002
O          0.24101       -0.83132        1.23358
H         -1.98387       -0.26306        0.00001
