# Supplementary material for: Role of base strength, cluster structure and charge in sulfuric-acid-driven particle formation
Source: Copernicus journal article supplement (doi:10.5194/acp-19-9753-2019), 2019-08-02
Supplement: Supplementary file 1 [file acp-19-9753-2019-supplement.zip › Acid-Base-Ions_xyz/1B1A.xyz]

13
1B1A.log	Energy: -878401.6536268
S         -1.88180        0.07982       -0.00000
O         -1.37449       -0.74245        1.24166
O         -1.37448       -0.74251       -1.24163
O         -3.32226        0.03813       -0.00001
O         -1.20905        1.38108       -0.00003
H         -0.35401       -0.70215        1.28739
H         -0.35401       -0.70220       -1.28736
S          1.87281       -0.09337        0.00000
O          1.18964       -0.60328        1.22517
O          1.18964       -0.60332       -1.22515
O          3.31452       -0.23559        0.00001
O          1.61274        1.50557       -0.00003
H          0.64182        1.64016       -0.00003
