# Supplementary material for: Role of base strength, cluster structure and charge in sulfuric-acid-driven particle formation
Source: Copernicus journal article supplement (doi:10.5194/acp-19-9753-2019), 2019-08-02
Supplement: Supplementary file 1 [file acp-19-9753-2019-supplement.zip › Acid-Base-Ions_xyz/1B1A1D.xyz]

23
1B1A1D.log	Energy: -963222.8591846
S          2.07194       -0.67369       -0.00619
O          3.35120       -1.30836       -0.27190
O          1.14523       -0.57021       -1.17257
O          1.33583       -1.63573        1.05091
O          2.17324        0.66472        0.65613
H          0.40810       -1.30817        1.18308
S         -2.07194       -0.67369        0.00619
O         -2.17324        0.66472       -0.65613
O         -3.35120       -1.30837        0.27190
O         -1.14523       -0.57021        1.17257
O         -1.33583       -1.63572       -1.05091
H         -0.40810       -1.30817       -1.18309
N         -0.00000        2.06702        0.00000
C          0.44567        2.85104       -1.16066
H         -0.38506        3.45063       -1.54002
H          0.78017        2.14765       -1.92402
H          1.27669        3.49740       -0.86941
C         -0.44567        2.85105        1.16066
H         -1.27668        3.49742        0.86940
H          0.38506        3.45064        1.54001
H         -0.78018        2.14767        1.92402
H         -0.80456        1.44730       -0.29624
H          0.80456        1.44730        0.29624
