# Supplementary material for: Role of base strength, cluster structure and charge in sulfuric-acid-driven particle formation
Source: Copernicus journal article supplement (doi:10.5194/acp-19-9753-2019), 2019-08-02
Supplement: Supplementary file 1 [file acp-19-9753-2019-supplement.zip › Acid-Base-Ions_xyz/1b1a1g.xyz]

22
1b1a1g.log	Energy: -1007273.6302968
O         -3.69555        1.00489       -0.25192
S         -3.81313       -0.46145       -0.13591
O         -4.12157       -0.63602        1.48096
O         -2.52591       -1.15930       -0.34925
O         -4.94897       -1.06764       -0.82365
H         -4.24263       -1.58109        1.63628
C          0.00000        1.43154       -0.00000
N          1.15696        2.11666       -0.01717
N         -1.15696        2.11666        0.01717
N         -0.00000        0.11222       -0.00000
H          1.13753        3.08305        0.26112
H          0.88489       -0.39767        0.10417
H         -0.88489       -0.39767       -0.10418
H         -1.13752        3.08305       -0.26111
H         -2.06927        1.63948       -0.05596
S          3.81313       -0.46145        0.13591
O          2.52591       -1.15930        0.34925
O          4.94897       -1.06764        0.82364
O          4.12157       -0.63601       -1.48096
H          4.24262       -1.58108       -1.63629
O          3.69555        1.00489        0.25193
H          2.06927        1.63947        0.05597
