# Supplementary material for: Role of base strength, cluster structure and charge in sulfuric-acid-driven particle formation
Source: Copernicus journal article supplement (doi:10.5194/acp-19-9753-2019), 2019-08-02
Supplement: Supplementary file 1 [file acp-19-9753-2019-supplement.zip › Acid-Base-Ions_xyz/1b1a1n.xyz]

17
1b1a1n.log	Energy: -913899.1647657
S         -2.10432       -0.23609       -0.07613
O         -3.39997       -0.88849       -0.11397
O         -1.14356       -0.61866       -1.14145
S          2.07661       -0.23886        0.03753
O          2.12089        0.89628       -0.93427
O          3.37755       -0.74055        0.44087
O          1.15801        0.12350        1.16669
N          0.14603        2.41953       -0.00479
H          0.85227        1.89665       -0.59521
O         -1.43093       -0.71885        1.31059
H         -0.47033       -0.47776        1.30966
H          0.46943        2.24070        0.94734
H          0.12981        3.41153       -0.21386
O          1.36669       -1.45967       -0.71863
H          0.43103       -1.20368       -0.93589
O         -2.19352        1.25932        0.01809
H         -0.83244        1.97224       -0.08434
