# Supplementary material for: Role of base strength, cluster structure and charge in sulfuric-acid-driven particle formation
Source: Copernicus journal article supplement (doi:10.5194/acp-19-9753-2019), 2019-08-02
Supplement: Supplementary file 1 [file acp-19-9753-2019-supplement.zip › Acid-Base-Ions_xyz/1B1A2D.xyz]

33
1B1A2D.log	Energy: -1048036.0199581
C         -0.97525       -2.59031        2.04907
N         -0.41168       -2.34458        0.72767
C          0.20977       -3.51757        0.12389
O         -2.33424       -1.31746       -0.66356
S         -2.19854        0.25707       -0.58961
O         -1.90043        0.57884        0.84824
O         -3.45512        0.81142       -1.07787
O         -1.00964        0.63580       -1.41642
N          0.23706        2.21841        0.79176
C          0.78626        2.38560        2.14582
C         -0.37885        3.42177        0.20958
O          1.31156       -0.71429       -1.55224
S          2.34251       -0.10557       -0.47094
O          1.75694       -0.41927        0.86197
O          3.60998       -0.75777       -0.76268
O          2.32978        1.37343       -0.68604
H          0.44561       -0.22253       -1.51644
H         -1.77701       -3.33361        1.97377
H         -1.40598       -1.65755        2.42141
H         -0.22273       -2.95889        2.76350
H         -0.55576       -4.27309       -0.08730
H          0.97527       -3.96458        0.77620
H          0.68254       -3.21673       -0.81341
H         -1.53317       -1.75148       -0.13473
H          0.30078       -1.60958        0.80253
H          1.01341        1.88753        0.15917
H         -0.50219        1.46684        0.81239
H         -0.02162        2.63480        2.83785
H          1.25573        1.44145        2.42484
H          1.53489        3.18121        2.13997
H          0.36967        4.21376        0.13209
H         -1.21053        3.74470        0.83927
H         -0.75228        3.15447       -0.77963
