# Supplementary material for: Role of base strength, cluster structure and charge in sulfuric-acid-driven particle formation
Source: Copernicus journal article supplement (doi:10.5194/acp-19-9753-2019), 2019-08-02
Supplement: Supplementary file 1 [file acp-19-9753-2019-supplement.zip › Acid-Base-Ions_xyz/1b1a2g.xyz]

31
1b1a2g.log	Energy: -1136148.4900089
O          4.67198       -0.59806       -1.37785
S          3.50058       -0.15968       -0.63502
O          3.42574       -1.10904        0.65028
O          2.19487       -0.36067       -1.34682
O          3.58473        1.24121       -0.13001
H          2.50994       -1.04174        1.09081
C         -0.04727       -1.52308        1.19103
N          1.00848       -1.02998        1.77848
N         -1.23380       -1.80226        1.84332
N         -0.00798       -1.85656       -0.12233
H          0.87336       -0.94671        2.78082
H          0.80295       -1.52585       -0.64571
H         -0.88886       -1.91431       -0.61629
H         -1.41073       -1.21976        2.64723
H         -2.04885       -1.87686        1.23943
C          0.16478        1.90033        0.52780
N          0.10253        1.36006       -0.67699
N          1.34982        2.24891        1.05315
N         -0.96776        2.18314        1.19997
H          0.92851        0.85457       -1.03500
H         -1.84496        1.70148        0.98353
H         -0.90063        2.65866        2.08275
H          2.21247        1.90761        0.57727
H          1.40655        2.25879        2.05899
S         -3.35913       -0.06004       -0.52726
O         -3.10500       -1.51153       -0.44833
O         -3.34004        0.63184        0.77162
O         -2.57293        0.61380       -1.57525
H         -0.80965        1.13984       -1.07744
O         -4.92661        0.08274       -0.98256
H         -5.01916       -0.38906       -1.82040
