# Supplementary material for: Role of base strength, cluster structure and charge in sulfuric-acid-driven particle formation
Source: Copernicus journal article supplement (doi:10.5194/acp-19-9753-2019), 2019-08-02
Supplement: Supplementary file 1 [file acp-19-9753-2019-supplement.zip › Acid-Base-Ions_xyz/1b1a2n.xyz]

21
1b1a2n.log	Energy: -949394.5058136
N          0.03819       -1.99550        1.08674
O          2.18145       -1.50803       -0.46566
S          2.35733       -0.05901       -0.15919
O          3.71142        0.44373       -0.31891
O          1.49518        0.74118       -1.26507
O          1.71069        0.26690        1.14842
N         -0.21483        2.48664        0.93063
O         -1.92943        0.45002        1.17362
S         -2.30190       -0.09081       -0.30393
O         -2.30415       -1.56960       -0.09753
O         -3.59783        0.45394       -0.68583
O         -1.17643        0.34853       -1.16717
H         -1.37846        1.29882        1.10168
H          0.81629       -2.08746        0.38876
H          0.54076        0.48280       -1.21091
H          0.25072       -1.08714        1.52328
H         -0.91322       -1.92983        0.61017
H         -0.18535        3.34489        1.46832
H          0.63211        1.93978        1.11228
H         -0.20335        2.72080       -0.05786
H          0.06284       -2.73692        1.77757
