# Supplementary material for: Role of base strength, cluster structure and charge in sulfuric-acid-driven particle formation
Source: Copernicus journal article supplement (doi:10.5194/acp-19-9753-2019), 2019-08-02
Supplement: Supplementary file 1 [file acp-19-9753-2019-supplement.zip › Acid-Base-Ions_xyz/1B1D.xyz]

16
1B1D.log	Energy: -523829.2270460
S          1.38871       -0.00393       -0.08512
N         -1.93450       -0.12538        0.04487
C         -3.12825       -0.93813       -0.04091
C         -2.19501        1.30435        0.03655
H         -1.27676       -0.35414       -0.70560
O          0.65320       -0.58527       -1.23921
O          1.18294        1.45355        0.03234
O          2.77259       -0.45700        0.05761
O          0.63994       -0.65418        1.23707
H         -2.85027       -1.99492       -0.09329
H         -3.74415       -0.79357        0.85620
H         -3.75971       -0.70107       -0.91864
H         -2.80516        1.62558       -0.82845
H         -2.73286        1.58809        0.95054
H         -1.23640        1.83019        0.01341
H         -0.32234       -0.51375        1.09727
