# Supplementary material for: Role of base strength, cluster structure and charge in sulfuric-acid-driven particle formation
Source: Copernicus journal article supplement (doi:10.5194/acp-19-9753-2019), 2019-08-02
Supplement: Supplementary file 1 [file acp-19-9753-2019-supplement.zip › Acid-Base-Ions_xyz/1b1g.xyz]

15
1b1g.log	Energy: -567884.4169625
S         -1.67288        0.00871       -0.07659
O         -1.50198       -0.16232        1.57022
O         -3.11885        0.02226       -0.24649
O         -0.96920        1.27469       -0.37938
O         -0.97258       -1.16246       -0.64827
C          2.59829        0.01491       -0.04979
N          1.93727       -1.12746       -0.46109
H          2.20794       -1.97013        0.01985
H          0.93373       -1.07754       -0.65493
N          1.97663        1.18690       -0.40014
H          0.96007        1.21110       -0.49249
H          2.39752        1.99924        0.02116
N          3.74756        0.05150        0.55211
H          4.10920       -0.89289        0.66706
H         -0.56136       -0.05246        1.75877
