# Supplementary material for: Role of base strength, cluster structure and charge in sulfuric-acid-driven particle formation
Source: Copernicus journal article supplement (doi:10.5194/acp-19-9753-2019), 2019-08-02
Supplement: Supplementary file 1 [file acp-19-9753-2019-supplement.zip › Acid-Base-Ions_xyz/1b1n.xyz]

10
1b1n.log	Energy: -474512.2540058
S         -0.60914        0.10460        0.00006
O         -0.05965        0.72229        1.22849
O         -0.06885        0.72482       -1.23065
O          0.00953       -1.43248       -0.00345
O         -2.05363       -0.12430        0.00571
N          2.59718       -0.05460        0.00016
H          0.98073       -1.32694       -0.00419
H          2.19936        0.40807       -0.81618
H          3.59928        0.09265        0.01920
H          2.16725        0.41225        0.79837
