# Supplementary material for: Role of base strength, cluster structure and charge in sulfuric-acid-driven particle formation
Source: Copernicus journal article supplement (doi:10.5194/acp-19-9753-2019), 2019-08-02
Supplement: Supplementary file 1 [file acp-19-9753-2019-supplement.zip › Acid-Base-Ions_xyz/1B2A.xyz]

20
1B2A.log	Energy: -1317767.2845008
S         -3.36961       -0.67328        0.08694
O         -4.59782       -1.41741        0.10094
O         -2.89540       -0.03281        1.31392
O         -3.49060        0.43030       -1.03486
O         -2.23278       -1.63293       -0.44184
H         -2.66864        1.00724       -1.02760
H         -1.34376       -1.17266       -0.38716
O         -0.53534        1.41571        1.44928
H         -1.38964        0.94652        1.58224
S         -0.12429        1.23659       -0.08328
O          0.01686       -0.24382       -0.29928
O         -1.23321        1.77506       -0.89551
O          1.13956        1.95580       -0.21423
S          3.54056       -0.61696        0.09332
O          2.42007       -1.35823       -0.75753
O          3.56340        0.83947       -0.54269
H          1.52335       -0.99637       -0.53175
H          2.70734        1.30508       -0.35652
O          4.79558       -1.23264       -0.25303
O          3.10278       -0.52743        1.47098
