# Supplementary material for: Role of base strength, cluster structure and charge in sulfuric-acid-driven particle formation
Source: Copernicus journal article supplement (doi:10.5194/acp-19-9753-2019), 2019-08-02
Supplement: Supplementary file 1 [file acp-19-9753-2019-supplement.zip › Acid-Base-Ions_xyz/1B2A1D.xyz]

30
1B2A1D.log	Energy: -1402595.2510401
S         -3.58632        0.11732        0.17789
O         -5.03005        0.23797        0.24783
O         -3.00057       -0.95224        1.03214
O         -3.27805       -0.33377       -1.34828
O         -2.86054        1.40791        0.36419
H         -2.32188       -0.55368       -1.40913
S          0.09240       -1.50201       -0.10797
O          0.51419       -0.54626        0.97145
O          1.21538       -2.35161       -0.53897
O         -0.56594       -0.75867       -1.20400
O         -0.97058       -2.47171        0.52318
H         -1.79661       -1.92431        0.74761
N         -0.29052        1.93632       -0.05849
C          0.13765        2.90625        0.96378
H          1.19561        3.13128        0.81889
H         -0.01666        2.45809        1.94558
H         -0.46575        3.81146        0.87567
C         -0.14075        2.40258       -1.44940
H          0.90532        2.65114       -1.63087
H         -0.78498        3.27069       -1.60113
H         -0.44382        1.58891       -2.10701
H          0.24569        1.06708        0.08178
H         -1.30028        1.66437        0.11171
S          3.55858        0.23494        0.04131
O          3.02342       -0.17500        1.47141
O          3.56655       -1.12766       -0.75854
O          2.59210        1.14533       -0.56200
O          4.93081        0.64771        0.18369
H          2.03676       -0.37246        1.39584
H          2.67064       -1.57981       -0.74225
