# Supplementary material for: Role of base strength, cluster structure and charge in sulfuric-acid-driven particle formation
Source: Copernicus journal article supplement (doi:10.5194/acp-19-9753-2019), 2019-08-02
Supplement: Supplementary file 1 [file acp-19-9753-2019-supplement.zip › Acid-Base-Ions_xyz/1b2a1g.xyz]

29
1b2a1g.log	Energy: -1446655.1834517
O         -4.44165        0.29157       -1.70658
S         -3.29912       -0.00061       -0.86406
O         -2.01553        0.08160       -1.84889
O         -3.28042       -1.38148       -0.29909
O         -3.01981        0.99165        0.21721
H         -1.21047        0.18185       -1.29426
C         -0.58669       -1.90380        1.35102
N          0.64787       -1.82414        1.87236
N         -0.82738       -2.66188        0.27357
N         -1.61197       -1.30957        1.96673
H          1.43577       -1.89732        1.23181
H         -1.37412       -0.44888        2.45039
H         -2.47391       -1.26892        1.41743
H         -0.04113       -3.00052       -0.25705
H         -1.69628       -2.45454       -0.22623
S          0.25747        1.51379        0.81085
O          0.15453        0.37252       -0.17652
O          0.04893        1.04655        2.18898
O          1.50465        2.27073        0.60944
H          0.77248       -1.04546        2.50948
O         -0.90687        2.50570        0.43013
H         -1.76962        1.98641        0.34242
S          3.42518       -0.38273       -0.74057
O          3.04748       -1.19666        0.41238
O          4.54629       -0.78804       -1.54559
O          2.16813       -0.24985       -1.68623
H          1.35812        0.00648       -1.14171
O          3.69930        1.09540       -0.26478
H          2.88288        1.52801        0.12971
