# Supplementary material for: Role of base strength, cluster structure and charge in sulfuric-acid-driven particle formation
Source: Copernicus journal article supplement (doi:10.5194/acp-19-9753-2019), 2019-08-02
Supplement: Supplementary file 1 [file acp-19-9753-2019-supplement.zip › Acid-Base-Ions_xyz/1b2a1n.xyz]

24
1b2a1n.log	Energy: -1353272.8220254
N          0.31609       -1.29367        1.90441
O         -0.02545        1.39233        1.62728
S         -0.13096        1.53935        0.16603
O         -1.33240        2.26156       -0.28185
O         -0.02580        0.19464       -0.51619
O          1.10483        2.37081       -0.34387
O         -2.22672       -0.83583       -1.43969
S         -3.19082       -0.75672       -0.19215
O         -3.54975        0.77901       -0.09115
O         -4.40729       -1.45181       -0.51639
O         -2.43444       -1.15455        0.99248
O          2.39099       -0.65313       -1.59032
S          3.25375       -0.60767       -0.21821
O          3.03768        0.76012        0.33121
O          2.63796       -1.63700        0.67037
O          4.61320       -0.90903       -0.62066
H          0.33915       -1.77704        2.79612
H         -0.53144       -1.54542        1.38306
H          1.20858       -1.47608        1.35194
H          0.25199       -0.26177        2.03566
H          1.93371        1.83722       -0.11394
H         -2.73616        1.36479       -0.09863
H         -1.33173       -0.45167       -1.17984
H          1.47931       -0.37070       -1.36584
