# Supplementary material for: Role of base strength, cluster structure and charge in sulfuric-acid-driven particle formation
Source: Copernicus journal article supplement (doi:10.5194/acp-19-9753-2019), 2019-08-02
Supplement: Supplementary file 1 [file acp-19-9753-2019-supplement.zip › Acid-Base-Ions_xyz/1B2A2D.xyz]

40
1B2A2D.log	Energy: -1487421.1784310
S         -3.26865        1.02414       -0.14587
O         -4.69223        0.98919       -0.44075
O         -2.72768        2.33260        0.29734
O         -3.08877        0.00653        1.09498
O         -2.39875        0.45677       -1.22738
H         -2.15383        0.04239        1.45256
S          0.36243       -0.98900        1.36014
O         -0.25634       -2.34666        1.33699
O          1.67736       -0.97809        2.05711
O         -0.57145        0.01998        1.94732
O          0.58392       -0.56298       -0.10976
N         -1.84884       -2.15490       -0.83888
C         -1.06730       -2.68246       -1.96997
H         -0.92166       -3.75715       -1.84288
H         -0.10150       -2.17770       -1.97095
H         -1.59927       -2.48321       -2.90264
C         -3.18579       -2.75217       -0.67190
H         -3.08589       -3.82478       -0.49227
H         -3.77598       -2.57222       -1.57264
H         -3.66611       -2.26531        0.17724
H         -1.28404       -2.27980        0.04382
H         -1.97217       -1.11664       -0.96814
N         -0.00482        2.14056       -0.12166
H         -1.02845        2.23090        0.06390
H          0.20078        1.11635       -0.12034
C          0.74697        2.78446        0.97620
C          0.29151        2.66408       -1.46826
H          1.34512        2.48413       -1.68753
H         -0.34916        2.13711       -2.17636
H          0.06903        3.73289       -1.49536
H          0.48883        3.84540        1.00653
H          1.81333        2.64589        0.79727
H          0.45461        2.29328        1.90446
S          3.80809        0.09286       -0.53917
O          5.10086       -0.06271       -1.16214
O          3.18565        1.41440       -0.53680
O          3.93538       -0.42624        0.94241
O          2.81304       -0.92611       -1.21045
H          1.88045       -0.81744       -0.77948
H          3.03127       -0.59882        1.37760
