# Supplementary material for: Role of base strength, cluster structure and charge in sulfuric-acid-driven particle formation
Source: Copernicus journal article supplement (doi:10.5194/acp-19-9753-2019), 2019-08-02
Supplement: Supplementary file 1 [file acp-19-9753-2019-supplement.zip › Acid-Base-Ions_xyz/1b2a2g.xyz]

38
1b2a2g.log	Energy: -1575546.2462866
O         -0.60606        3.49667       -0.76803
S          0.66459        3.63661       -0.05271
O          0.91690        5.25213       -0.06025
O          1.82359        3.04074       -0.74260
O          0.60787        3.26040        1.38000
H          1.73418        5.41286        0.42897
C         -0.04858       -0.00446        1.72020
N         -0.30257       -1.31041        1.59738
N          1.21219        0.42686        1.81455
N         -1.05203        0.87683        1.81078
H          0.43558       -1.92683        1.26197
H         -1.98705        0.60870        1.50110
H         -0.80250        1.86090        1.77059
H          1.98723       -0.22387        1.69397
H          1.37667        1.42505        1.72546
S          2.99451       -2.30732        0.03179
O          3.37345       -1.64752       -1.23021
O          3.28845       -1.56813        1.26090
O          1.60668       -2.83234       -0.01946
H         -1.25823       -1.63337        1.44326
O          3.96636       -3.61560        0.14946
H          3.92053       -4.07874       -0.69698
C         -0.00382       -0.08997       -1.71929
N         -1.01648        0.77917       -1.77121
N          1.25340        0.33360       -1.62308
N         -0.26011       -1.40759       -1.82095
H         -0.86440        1.76622       -1.56427
H         -1.23621       -1.67798       -1.73344
H          0.42466       -2.04265       -1.41439
H          1.46431        1.31166       -1.42076
H          2.02072       -0.33743       -1.59254
S         -3.59885       -1.24305        0.01086
O         -2.92874       -2.29364        0.79863
O         -3.16787       -1.16924       -1.39491
O         -5.16001       -1.70853       -0.12576
H         -5.51694       -1.76224        0.77027
O         -3.62448        0.05848        0.70389
H         -1.95792        0.40782       -1.68317
