# Supplementary material for: Role of base strength, cluster structure and charge in sulfuric-acid-driven particle formation
Source: Copernicus journal article supplement (doi:10.5194/acp-19-9753-2019), 2019-08-02
Supplement: Supplementary file 1 [file acp-19-9753-2019-supplement.zip › Acid-Base-Ions_xyz/1b2a2n.xyz]

28
1b2a2n.log	Energy: -1388776.9514188
S          3.12775       -1.02254        0.06793
O          2.77660       -0.62712        1.45785
O          3.05855        0.34537       -0.80273
O          4.48282       -1.50671       -0.11445
H          2.24461        0.84904       -0.57240
S         -2.72177       -1.24786        0.01640
O         -3.03483        0.16743        0.22516
O         -4.13835       -1.98060        0.36491
O         -2.42462       -1.62419       -1.38202
H         -4.00513       -2.92930        0.24007
S         -0.25747        2.52263       -0.04429
O          0.52724        1.32356       -0.51131
O         -0.47153        2.41406        1.41703
O         -1.69738        2.35185       -0.74098
O          0.24776        3.78841       -0.53500
O          2.07232       -1.90780       -0.50702
N          0.21331       -0.16231        2.16103
N          0.17409       -0.84871       -2.04869
H         -2.17520        1.58088       -0.35467
H          0.91259       -1.36695       -1.49425
H          0.41445       -0.83582       -3.03413
H         -0.76761       -1.25683       -1.89677
H          0.17575        0.11925       -1.65951
H          1.19994       -0.35999        1.84368
H         -0.45425       -0.79757        1.68753
H         -0.03978        0.82541        1.92838
H          0.14765       -0.30374        3.16415
O         -1.74118       -1.80464        0.96866
