# Supplementary material for: Role of base strength, cluster structure and charge in sulfuric-acid-driven particle formation
Source: Copernicus journal article supplement (doi:10.5194/acp-19-9753-2019), 2019-08-02
Supplement: Supplementary file 1 [file acp-19-9753-2019-supplement.zip › Acid-Base-Ions_xyz/1B2A3D.xyz]

50
1B2A3D.log	Energy: -1572241.3045220
S          2.72068       -1.56415        1.13498
O          2.96426       -2.77970        1.89494
O          2.49803       -1.77048       -0.33122
O          1.31086       -1.00844        1.67698
O          3.71241       -0.47481        1.34830
H          1.08779       -0.15233        1.19778
S          0.19965        1.72308       -0.80556
O          1.31806        2.12175       -1.72076
O         -0.70061        2.88116       -0.50462
O          0.80507        1.23845        0.49696
O         -0.60051        0.61001       -1.42605
N          3.61852        1.27498       -0.71731
C          4.37255        0.54633       -1.75078
H          4.40352        1.14257       -2.66532
H          3.86013       -0.40051       -1.92443
H          5.38476        0.34815       -1.39123
C          4.23318        2.53382       -0.27049
H          4.34316        3.20699       -1.12314
H          5.20694        2.32794        0.17955
H          3.57074        2.98876        0.46625
H          2.65312        1.51240       -1.09178
H          3.51647        0.63960        0.11095
N         -0.21373       -2.08100       -0.76221
H          0.80136       -1.89298       -0.61281
H         -0.71757       -1.22569       -0.48126
C         -0.62710       -3.20262        0.10642
C         -0.44325       -2.31153       -2.20457
H         -1.50950       -2.48076       -2.35913
H         -0.12714       -1.41468       -2.73630
H          0.14649       -3.17642       -2.51593
H         -0.03994       -4.08351       -0.16068
H         -1.69393       -3.37314       -0.03914
H         -0.42314       -2.92026        1.13826
S         -3.57423       -0.79423       -0.34323
O         -2.47713       -0.76904        0.68876
O         -4.89863       -0.52530        0.21061
O         -3.45326       -1.97947       -1.20298
O         -3.26318        0.51225       -1.25039
H         -2.28084        0.58601       -1.40743
N         -2.18399        1.80631        1.47922
C         -3.56682        2.31567        1.54301
C         -1.41986        1.92402        2.73377
H         -1.65572        2.29954        0.70620
H         -4.12756        1.74822        2.28765
H         -3.54721        3.37617        1.80462
H         -4.02829        2.16879        0.56655
H         -1.40089        2.97019        3.04775
H         -1.89197        1.31062        3.50408
H         -0.40392        1.58051        2.53771
H         -2.22524        0.79143        1.19595
