# Supplementary material for: Role of base strength, cluster structure and charge in sulfuric-acid-driven particle formation
Source: Copernicus journal article supplement (doi:10.5194/acp-19-9753-2019), 2019-08-02
Supplement: Supplementary file 1 [file acp-19-9753-2019-supplement.zip › Acid-Base-Ions_xyz/1b2a3g.xyz]

47
1b2a3g.log	Energy: -1704419.5021159
O          4.81377        0.44152        0.00457
S          3.58627       -0.34013       -0.05931
O          2.66805        0.33311        1.09747
O          3.68441       -1.77750        0.25970
O          2.82644       -0.13507       -1.33302
H          1.80910       -0.13167        1.17506
C          1.54736        3.09902       -0.45593
N          0.72007        3.88418        0.19264
N          2.91840        3.24495       -0.43944
N          1.07464        2.11796       -1.25567
H          1.21960        4.65029        0.63479
H          0.09006        1.89257       -1.19421
H          1.67935        1.31506       -1.42570
H          3.28389        3.63713        0.41493
H          3.46205        2.44148       -0.73606
C         -2.13871        2.36116        0.99621
N         -2.13167        3.19819       -0.05137
N         -3.18097        1.54464        1.21252
N         -1.13899        2.40629        1.87766
H         -2.64822        2.88793       -0.86878
H         -0.29126        2.88114        1.54674
H         -1.06197        1.62651        2.52418
H         -3.78132        1.34453        0.42344
H         -3.00278        0.76316        1.84148
S         -2.43130       -0.06042       -1.67514
O         -2.11449       -0.99239       -2.77146
O         -1.19941        0.33286       -0.92500
O         -3.25313        1.10021       -2.02936
H         -1.23182        3.67149       -0.20486
O         -3.34050       -0.86757       -0.61856
H         -2.78246       -1.33579        0.06515
C          0.40829       -2.72391       -1.20562
N          0.85571       -1.94643       -2.19507
N          1.22393       -3.11130       -0.22651
N         -0.85661       -3.18972       -1.25322
H          1.69558       -1.38510       -2.00774
H         -1.47212       -2.68999       -1.89309
H         -1.28060       -3.37401       -0.34985
H          2.14092       -2.66087       -0.10168
H          0.81665       -3.50888        0.60792
S         -0.97504       -1.38949        2.13268
O         -0.12114       -2.26911        2.91156
O         -1.68110       -0.32436        2.87557
O          0.05387       -0.61256        1.13675
H         -0.44126       -0.25068        0.34828
O         -1.90105       -2.11620        1.20969
H          0.13881       -1.49627       -2.75365
