# Supplementary material for: Role of base strength, cluster structure and charge in sulfuric-acid-driven particle formation
Source: Copernicus journal article supplement (doi:10.5194/acp-19-9753-2019), 2019-08-02
Supplement: Supplementary file 1 [file acp-19-9753-2019-supplement.zip › Acid-Base-Ions_xyz/1b2a3n.xyz]

32
1b2a3n.log	Energy: -1424280.1073630
N         -0.15936        0.02424        2.41337
H          0.32771        0.06934        3.30297
H         -0.15137        0.97091        1.96771
H          0.34076       -0.64022        1.78756
N          0.56796       -0.02695       -2.55039
H         -0.33346       -0.55353       -2.47970
H          0.77698        0.20446       -3.51570
H          0.53862        0.83863       -1.96861
N         -2.98900       -0.52053        2.56477
H         -3.33960        0.39775        2.30613
H         -1.15798       -0.27092        2.53859
H         -3.54858       -0.85601        3.34157
S         -0.08828        2.81357       -0.10922
O         -0.20447        2.54840        1.34434
O          0.00974        4.21013       -0.48632
O         -1.45099        2.29018       -0.78663
O          0.98035        1.93757       -0.71089
H          2.00812        0.92607        0.20189
H         -1.56480        1.33053       -0.55383
S         -1.94100       -1.50333       -0.68016
O         -1.40070       -0.24971       -0.07394
O         -1.73047       -1.50317       -2.14706
O         -3.29753       -1.83224       -0.24795
O         -1.02809       -2.67062       -0.06882
H         -0.10594       -2.34088        0.09889
H         -3.17360       -1.12283        1.75880
S          2.59359       -1.18316        0.27680
O          1.28019       -1.70729        0.78596
O          2.61527        0.35701        0.74533
O          3.74559       -1.78396        0.92103
O          2.61523       -1.18757       -1.20612
H          1.34401       -0.59371       -2.13072
