# Supplementary material for: Role of base strength, cluster structure and charge in sulfuric-acid-driven particle formation
Source: Copernicus journal article supplement (doi:10.5194/acp-19-9753-2019), 2019-08-02
Supplement: Supplementary file 1 [file acp-19-9753-2019-supplement.zip › Acid-Base-Ions_xyz/1B2D.xyz]

26
1B2D.log	Energy: -608637.6745017
C         -3.03899        1.25121        1.16607
N         -3.16422        1.19833       -0.28327
C         -4.01709        0.09479       -0.69752
O         -0.35605        0.23074       -0.97550
S         -0.05510       -0.90786       -0.07513
O         -1.22978       -1.65988        0.36762
O          0.49951       -0.21893        1.31116
O          1.07840       -1.72488       -0.56892
N          2.96648        0.44917        0.05221
C          2.75933        1.53267       -0.89579
C          4.32113        0.36322        0.55637
H          1.37861        0.16818        1.08914
H         -4.00672        1.52311        1.61163
H         -2.31108        2.02041        1.44108
H         -2.70533        0.29614        1.60464
H         -2.23126        1.02108       -0.65862
H         -5.04665        0.27446       -0.35610
H         -4.03280        0.03575       -1.79081
H         -3.67927       -0.87859       -0.30449
H          2.67609       -0.43417       -0.37306
H          4.55675        1.25962        1.14356
H          4.41370       -0.50594        1.21399
H          5.08169        0.27857       -0.24237
H          2.88562        2.49640       -0.38675
H          3.46680        1.50176       -1.74462
H          1.73673        1.46883       -1.27743
