# Supplementary material for: Role of base strength, cluster structure and charge in sulfuric-acid-driven particle formation
Source: Copernicus journal article supplement (doi:10.5194/acp-19-9753-2019), 2019-08-02
Supplement: Supplementary file 1 [file acp-19-9753-2019-supplement.zip › Acid-Base-Ions_xyz/1b2g.xyz]

24
1b2g.log	Energy: -696754.3538522
S          2.13076       -0.22597       -0.05860
O          3.58325       -0.32678       -0.01965
O          1.57729        0.53464       -1.21013
O          1.42041       -1.51032        0.15566
O          1.73881        0.68224        1.25042
H          0.97937        1.25557        1.00359
C         -1.96824       -1.59310        0.20062
N         -1.20838       -2.38780       -0.61829
N         -3.19535       -1.31534       -0.12233
N         -1.32323       -1.18294        1.35094
H         -0.20280       -2.22282       -0.61332
H         -1.64128       -2.59188       -1.50441
H         -1.65476       -0.30223        1.72018
H         -0.30823       -1.25559        1.32223
H         -3.64353       -0.81405        0.64179
C         -1.42671        1.83623       -0.21412
N         -0.23536        2.46107        0.17976
N         -2.49584        2.07067        0.46657
N         -1.28689        1.02009       -1.30702
H          0.43793        2.59145       -0.56784
H         -0.41502        3.29384        0.72323
H         -2.01494        0.31867       -1.39053
H         -0.33930        0.67181       -1.46922
H         -3.26261        1.51360        0.09512
