# Supplementary material for: Role of base strength, cluster structure and charge in sulfuric-acid-driven particle formation
Source: Copernicus journal article supplement (doi:10.5194/acp-19-9753-2019), 2019-08-02
Supplement: Supplementary file 1 [file acp-19-9753-2019-supplement.zip › Acid-Base-Ions_xyz/1b2n.xyz]

14
1b2n.log	Energy: -510004.4252801
N          3.37224        1.03378        0.11237
O          0.24029        1.01763        0.01378
S         -0.01381       -0.44071       -0.09884
O         -0.96593       -0.79757        1.19850
O         -0.83397       -0.77649       -1.27976
O          1.16467       -1.28471        0.11319
N         -2.77900        1.15996        0.06263
H          3.63067        1.06744       -0.87024
H          2.44448        1.45667        0.16079
H          3.16651        0.05335        0.30078
H         -3.59790        1.75407        0.01534
H         -2.71407        0.59808       -0.78425
H         -1.93700        1.73473        0.06635
H         -1.76485       -0.24004        1.10207
