# Supplementary material for: Role of base strength, cluster structure and charge in sulfuric-acid-driven particle formation
Source: Copernicus journal article supplement (doi:10.5194/acp-19-9753-2019), 2019-08-02
Supplement: Supplementary file 1 [file acp-19-9753-2019-supplement.zip › Acid-Base-Ions_xyz/1B3A.xyz]

27
1B3A.log	Energy: -1757129.6569628
S          4.51386       -0.14565        0.36555
O          5.89268        0.07524        0.69533
O          3.62402       -0.77936        1.33840
O          4.46911       -0.98642       -0.97029
O          3.88890        1.24840       -0.04075
H          3.51966       -1.21139       -1.19117
H          2.90511        1.15417       -0.18043
S          0.89981       -0.66703       -0.56494
O          0.94834       -1.28168        0.90612
O          1.88514       -1.39342       -1.38273
O         -0.49516       -0.82205       -0.97823
O          1.28557        0.77661       -0.42813
H          1.87428       -1.20090        1.23170
S         -3.62611       -1.56084        0.15868
O         -3.30114       -0.87425        1.54175
O         -4.73374       -2.45035        0.36409
H         -2.76940       -0.04431        1.40524
O         -3.72311       -0.51058       -0.85830
O         -2.36574       -2.44719       -0.15042
H         -1.59963       -1.88280       -0.45888
S         -1.89652        2.38408        0.09105
O         -2.58288        3.61487        0.37711
O         -1.88720        1.31790        1.09672
O         -2.42618        1.77748       -1.26600
O         -0.41858        2.75760       -0.26375
H         -2.83860        0.88357       -1.12607
H          0.17183        1.95012       -0.33315
