# Supplementary material for: Role of base strength, cluster structure and charge in sulfuric-acid-driven particle formation
Source: Copernicus journal article supplement (doi:10.5194/acp-19-9753-2019), 2019-08-02
Supplement: Supplementary file 1 [file acp-19-9753-2019-supplement.zip › Acid-Base-Ions_xyz/1B3A1D.xyz]

37
1B3A1D.log	Energy: -1841959.8406688
C          1.00315        2.28780        1.92393
N          0.32414        0.98960        1.73331
C          0.08931        0.22550        2.97588
O          2.91901        0.02845        1.31339
S          4.08261       -0.10366        0.44202
O          3.82452        0.77364       -0.85460
O          4.15223       -1.57411       -0.09876
O          5.38414        0.24917        0.94186
O          1.32474        0.24215       -1.70179
S          0.74277       -1.25775       -1.41047
O          0.13728       -1.11572       -0.04910
O          1.97987       -2.06220       -1.38898
O         -0.20801       -1.58755       -2.44854
O         -0.34525        2.12010       -1.06077
S         -1.80431        2.21799       -0.79921
O         -2.07473        1.61077        0.56096
O         -2.36027        3.54046       -0.97936
O         -2.54943        1.27218       -1.84175
O         -3.22510       -1.16389       -0.78271
S         -3.34585       -1.53831        0.62292
O         -4.31345       -2.51957        1.03265
O         -1.92993       -2.01217        1.13062
O         -3.63198       -0.23530        1.47020
H          0.87180        0.39269        1.09893
H         -1.17741       -1.70738        0.52628
H         -3.12234        0.53972        1.08482
H         -0.58670        1.15978        1.25351
H          1.98079        2.11312        2.37168
H          0.38194        2.91579        2.56487
H          1.11057        2.75515        0.94520
H          1.05316       -0.02262        3.42145
H         -0.45489       -0.68522        2.72417
H         -0.50628        0.83373        3.65870
H          3.27895       -1.82467       -0.54822
H          0.60864        0.92967       -1.55399
H          2.90505        0.62065       -1.20214
H         -2.63972        0.34914       -1.50784
