# Supplementary material for: Role of base strength, cluster structure and charge in sulfuric-acid-driven particle formation
Source: Copernicus journal article supplement (doi:10.5194/acp-19-9753-2019), 2019-08-02
Supplement: Supplementary file 1 [file acp-19-9753-2019-supplement.zip › Acid-Base-Ions_xyz/1b3a1g.xyz]

36
1b3a1g.log	Energy: -1886026.1550525
O         -3.62865       -0.50961       -0.00924
S         -3.18710       -1.99871       -0.26487
O         -2.17874       -1.90728       -1.46881
O         -4.34397       -2.73230       -0.70128
O         -2.46520       -2.48256        0.91592
H         -1.27096       -1.59277       -1.17068
C         -0.17442       -0.57453        2.27157
N         -1.46533       -0.32642        2.49986
N          0.25001       -1.84075        2.11088
N          0.70706        0.42694        2.30956
H         -2.11955       -1.05593        2.23896
H          0.32202        1.35703        2.17295
H          1.62783        0.23771        1.92925
H         -0.45311       -2.48043        1.75888
H          1.16403       -1.94031        1.68414
S          0.82328        0.03622       -1.48685
O          1.88724       -0.51652       -2.33484
O          1.32831        1.16401       -0.63511
O         -0.23241        0.66663       -2.48245
H         -0.99011        1.00886       -1.92878
O          0.11181       -0.97224       -0.67446
H         -1.76298        0.63903        2.36287
S          4.15581       -0.47958        0.29681
O          5.48508       -0.59879        0.82663
O          3.01680       -0.96715        1.07348
O          3.89252        1.04542       -0.02780
H          2.92996        1.17670       -0.27532
O          4.14902       -1.17929       -1.11565
H          3.28674       -1.01498       -1.59718
S         -1.74211        2.65500        0.20123
O         -1.41244        2.34104        1.60891
O         -2.77953        3.64050       -0.00446
O         -0.41534        3.27619       -0.45506
H          0.28947        2.58813       -0.47167
O         -1.94975        1.36882       -0.57952
H         -2.93500        0.20389       -0.20599
