# Supplementary material for: Role of base strength, cluster structure and charge in sulfuric-acid-driven particle formation
Source: Copernicus journal article supplement (doi:10.5194/acp-19-9753-2019), 2019-08-02
Supplement: Supplementary file 1 [file acp-19-9753-2019-supplement.zip › Acid-Base-Ions_xyz/1b3a1n.xyz]

31
1b3a1n.log	Energy: -1792637.2872001
N         -0.10670       -1.17636       -0.35531
H         -0.97432       -1.70913       -0.21180
H          0.70886       -1.74342       -0.61402
H         -0.31611       -0.45986       -1.08008
S         -1.94693        1.56241       -0.64918
O         -1.74856        0.85729        0.65317
O         -1.05277        1.02003       -1.68748
H          3.55351        3.16107        1.18877
S          2.10986        1.75191        0.49596
O          3.25483        2.30205        1.51638
O          2.79504        1.49966       -0.78860
O          1.69824        0.50045        1.17295
O          1.09614        2.80129        0.43330
H          0.12018       -0.63400        0.48499
O         -3.36677        1.63762       -1.03085
H         -4.27119        0.27200       -0.81409
S          3.78219       -1.85989       -0.29681
O          4.40716       -0.57371       -0.95967
O          3.52125       -1.43004        1.20495
O          4.79942       -2.87349       -0.28097
O          2.49648       -2.14079       -0.92819
H          3.76943        0.20263       -0.95535
H          2.82748       -0.71193        1.25813
S         -4.05636       -1.53283        0.36492
O         -3.62104       -0.64670        1.59474
O         -5.01284       -2.50178        0.82748
O         -4.82863       -0.52824       -0.57600
O         -2.84989       -1.99295       -0.32103
H         -2.88861       -0.00962        1.30877
O         -1.51709        3.07656       -0.40326
H         -0.57017        3.06317       -0.13190
