# Supplementary material for: Role of base strength, cluster structure and charge in sulfuric-acid-driven particle formation
Source: Copernicus journal article supplement (doi:10.5194/acp-19-9753-2019), 2019-08-02
Supplement: Supplementary file 1 [file acp-19-9753-2019-supplement.zip › Acid-Base-Ions_xyz/1b3a2b.xyz]

45
1b3a2b.log	Energy: -2014920.6500693
O         -5.77546       -1.42146       -0.25753
S         -4.57364       -0.64461       -0.12377
O         -3.86448       -0.58607       -1.53179
O         -3.56484       -1.05493        0.85712
O         -4.99340        0.83940        0.16779
H         -2.96340       -0.13339       -1.44568
C         -0.41640       -2.13396        1.40146
N          0.81805       -2.60125        1.62192
N         -1.02174       -1.40918        2.35132
N         -1.07988       -2.46251        0.29054
H          1.33163       -2.12993        2.36167
H         -0.53360       -2.66911       -0.53583
H         -1.97882       -2.01205        0.14887
H         -0.41422       -0.93750        3.01152
H         -1.88841       -0.94522        2.10191
S          2.53794       -1.84415       -1.66050
O          3.30148       -0.68000       -2.16149
O          2.37739       -2.95231       -2.57916
O          2.98842       -2.24710       -0.28800
H          1.39622       -2.86501        0.82681
O          1.02017       -1.30099       -1.42419
H          1.04003       -0.62446       -0.71101
C          2.48371        2.28167       -1.02731
N          3.69789        1.77297       -0.77911
N          1.81424        1.88773       -2.11248
N          1.98607        3.24814       -0.23954
H          3.88145        0.85748       -1.19161
H          2.28819        3.19979        0.72939
H          0.99390        3.43860       -0.36923
H          2.13787        1.03968       -2.56786
H          0.82061        2.10210       -2.14112
S          2.27831        0.42509        1.94471
O          1.30696        0.38837        0.79142
O          1.73187       -0.28913        3.11154
O          3.55740       -0.37457        1.43108
H          3.32308       -1.10277        0.77526
O          2.77448        1.77798        2.21187
H          4.06001        1.90962        0.15514
S         -1.60036        1.90148       -0.42633
O         -0.72751        2.88474       -1.09248
O         -1.59082        0.58993       -1.12982
O         -1.00221        1.63354        1.02869
H         -0.11980        1.17245        0.95671
O         -2.95928        2.40446       -0.15192
H         -4.19838        1.46232        0.11086
