# Supplementary material for: Role of base strength, cluster structure and charge in sulfuric-acid-driven particle formation
Source: Copernicus journal article supplement (doi:10.5194/acp-19-9753-2019), 2019-08-02
Supplement: Supplementary file 1 [file acp-19-9753-2019-supplement.zip › Acid-Base-Ions_xyz/1B3A2D.xyz]

47
1B3A2D.log	Energy: -1926793.9302574
C         -1.00875        0.67828       -2.93072
N         -1.17493        1.45315       -1.68453
C         -2.30526        2.40968       -1.69474
O         -1.49670       -0.24744        0.46212
S         -1.83152        0.69874        1.63005
O         -1.24481        0.11443        2.86624
O         -3.30439        0.87019        1.70987
O         -1.17555        2.01372        1.29650
O          1.35169        2.08344        1.33101
S          1.91518        1.82160       -0.11735
O          1.26888        2.75333       -1.05377
O          3.37483        1.96104        0.01062
O          1.52300        0.39891       -0.44220
O         -3.14296       -2.06040       -0.21026
S         -4.37021       -1.30066       -0.84553
O         -3.85885       -0.32332       -1.80320
O         -5.32334       -2.28523       -1.29242
O         -5.01592       -0.54150        0.37455
O          3.16641       -1.08328       -1.80936
S          4.35828       -1.35896       -0.80454
O          5.06426        0.04750       -0.66799
O          5.29061       -2.23642       -1.46099
O          3.78862       -1.73662        0.48245
N          1.06888       -1.01151        1.98965
C          0.86175       -2.44888        1.72016
C          2.14959       -0.70814        2.95227
H          0.31603        2.08500        1.33587
H         -1.90864        0.08292       -3.08844
H         -0.13911        0.03107       -2.81399
H         -0.84755        1.36573       -3.76329
H         -3.22792        1.85111       -1.84985
H         -2.14597        3.13603       -2.49446
H         -2.32381        2.90537       -0.72405
H         -1.30269        0.78163       -0.89050
H         -0.30023        1.96811       -1.47828
H          1.26220       -0.53327        1.09063
H          0.17191       -0.59684        2.34964
H          0.61644       -2.95320        2.65644
H          0.02704       -2.54260        1.02525
H          1.77336       -2.86067        1.28588
H          3.08915       -1.10288        2.56728
H          1.89826       -1.16018        3.91357
H          2.21135        0.37555        3.05286
H          4.43084        0.75789       -0.35283
H          2.47150       -0.52575       -1.34299
H         -4.34300        0.03330        0.87008
H         -2.44464       -1.37380        0.08601
