# Supplementary material for: Role of base strength, cluster structure and charge in sulfuric-acid-driven particle formation
Source: Copernicus journal article supplement (doi:10.5194/acp-19-9753-2019), 2019-08-02
Supplement: Supplementary file 1 [file acp-19-9753-2019-supplement.zip › Acid-Base-Ions_xyz/1b3a2n.xyz]

35
1b3a2n.log	Energy: -1828149.2032832
N         -1.73438        2.11853        0.33992
H         -0.94023        2.44842       -0.25625
H         -2.63472        2.05559       -0.15527
H         -1.80947        2.72204        1.15351
N          1.67659       -1.28112        1.64494
H          2.65167       -1.47706        1.26713
H          1.60284       -1.60936        2.60260
H          1.48841       -0.26042        1.60532
S          1.52096        1.74649       -0.15715
O          0.65447        2.72668       -0.83523
O          1.64522        0.45670       -0.92239
O          1.06279        1.45204        1.22442
H          0.16049       -0.16502       -1.28723
S         -1.35698       -1.43698       -0.38481
O         -0.80203       -0.39559       -1.45017
O         -2.55264       -2.01152       -1.01643
O         -0.28944       -2.38848       -0.07155
O         -1.72560       -0.61189        0.82408
H         -1.51519        1.15193        0.65083
H          0.97616       -1.76223        1.05375
O          2.94419        2.39046       -0.11487
H          3.62119        1.70875        0.24811
S         -5.01781        0.16097        0.13062
O         -5.00172       -1.13497       -0.75889
O         -4.24169       -0.26555        1.44377
O         -6.38125        0.42536        0.49782
O         -4.24342        1.20595       -0.53788
H         -4.06178       -1.44546       -0.93745
H         -3.27430       -0.45779        1.24327
S          4.83677       -0.65735        0.07152
O          4.24503       -0.46293       -1.42000
O          6.25529       -0.87593       -0.11470
O          4.47353        0.59839        0.80222
O          4.09652       -1.80518        0.66422
H          3.29858       -0.20961       -1.36068
