# Supplementary material for: Role of base strength, cluster structure and charge in sulfuric-acid-driven particle formation
Source: Copernicus journal article supplement (doi:10.5194/acp-19-9753-2019), 2019-08-02
Supplement: Supplementary file 1 [file acp-19-9753-2019-supplement.zip › Acid-Base-Ions_xyz/1B3A3D.xyz]

57
1B3A3D.log	Energy: -2011617.7375636
S         -2.09680        0.80310        1.23132
O         -3.49146        0.80872        1.75103
O         -1.63057       -0.61845        0.99275
O         -2.03758        1.52378       -0.10281
O         -1.15067        1.46781        2.18018
S          2.16074        1.09826       -1.12881
O          1.69647       -0.23511       -0.52950
O          3.54661        0.93984       -1.64194
O          2.10069        2.12498       -0.03370
O          1.19531        1.45418       -2.21404
N          1.22025        0.04523        2.16854
C          1.02000       -1.31879        2.69992
H          1.94869       -1.87759        2.57685
H          0.20413       -1.77611        2.14084
H          0.74502       -1.25332        3.75463
C          2.24531        0.83236        2.88350
H          3.18900        0.28820        2.85192
H          1.91655        0.98723        3.91357
H          2.35990        1.78298        2.36353
H          1.47801       -0.03129        1.15956
H          0.31249        0.56224        2.18647
N         -1.03142       -0.19818       -2.05647
H         -1.55187        0.18297       -1.24372
H         -0.12597        0.32050       -2.06019
C         -1.76896        0.15309       -3.28549
C         -0.78944       -1.64534       -1.88545
H         -0.14990       -1.99379       -2.69861
H         -0.28800       -1.78780       -0.93099
H         -1.74998       -2.15995       -1.89208
H         -2.74259       -0.33575       -3.26159
H         -1.18754       -0.16599       -4.15247
H         -1.89927        1.23547       -3.30827
S         -4.55160       -1.79163       -0.27021
O         -5.51134       -2.82957       -0.55599
O         -3.93166       -1.07176       -1.37880
O         -3.40168       -2.42309        0.60672
O         -5.24460       -0.76106        0.69543
H         -4.57229       -0.09493        1.07129
H         -2.67757       -1.72348        0.78238
S          4.49343       -1.90783        0.15144
O          5.35687       -3.06205        0.19115
O          5.20910       -0.81412       -0.72711
O          4.05211       -1.30928        1.40721
H          4.56722       -0.08752       -1.03018
O          3.21202       -2.28521       -0.69169
H          2.56818       -1.49590       -0.67779
N         -0.20979        3.47774       -0.11633
C         -0.25044        4.18728       -1.40751
C         -0.40378        4.33782        1.06428
H          0.71141        2.96556       -0.04483
H          0.48482        4.99498       -1.39943
H          0.01046        3.47239       -2.18880
H         -1.25118        4.59546       -1.56552
H          0.42334        5.04773        1.13608
H         -1.34927        4.87592        0.96681
H         -0.44794        3.69474        1.94347
H         -0.94450        2.71775       -0.10944
