# Supplementary material for: Role of base strength, cluster structure and charge in sulfuric-acid-driven particle formation
Source: Copernicus journal article supplement (doi:10.5194/acp-19-9753-2019), 2019-08-02
Supplement: Supplementary file 1 [file acp-19-9753-2019-supplement.zip › Acid-Base-Ions_xyz/1b3a3g.xyz]

54
1b3a3g.log	Energy: -2143806.5290046
O          5.16154        0.32433       -0.75411
S          5.15879       -1.14548       -0.98877
O          3.90825       -1.44397       -1.96597
O          4.82863       -1.84493        0.29566
O          6.31734       -1.65831       -1.69074
H          3.08124       -1.29128       -1.45571
C         -1.49812       -0.15025       -1.59413
N         -0.29066        0.41785       -1.57624
N         -2.55735        0.57362       -1.98619
N         -1.63745       -1.43495       -1.27330
H         -0.23687        1.41684       -1.73006
H         -0.87606       -1.93152       -0.81490
H         -2.55931       -1.87398       -1.26070
H         -2.42703        1.57794       -2.02761
H         -3.49957        0.22854       -1.79552
S          1.48676       -1.90814        0.85934
O          1.53708       -1.15488        2.13955
O          0.20741       -2.62387        0.69852
O          1.78076       -1.01438       -0.30297
H          0.50469       -0.07998       -1.17195
O          2.61345       -3.00220        0.87852
H          3.51343       -2.58633        0.64065
C          2.88866        1.66482        1.13328
N          1.81961        2.11118        1.80541
N          3.68375        0.74209        1.68745
N          3.18144        2.18241       -0.05697
H          1.66883        1.81014        2.75287
H          2.54915        2.86009       -0.46215
H          3.86362        1.67558       -0.62551
H          3.20226        0.04231        2.24616
H          4.40370        0.36534        1.06942
S         -0.82062        3.72998       -0.27601
O         -1.47531        3.05163        0.85215
O         -1.18007        3.21815       -1.61069
O         -1.44433        5.23040       -0.19496
H         -1.12945        5.72042       -0.96644
O          0.63921        3.87794       -0.09550
H          1.24642        2.84509        1.39581
C         -2.07457       -0.14427        1.78394
N         -3.13614        0.63430        1.55348
N         -0.86583        0.40812        1.85988
N         -2.23244       -1.45868        1.99106
H         -2.97568        1.59968        1.29343
H         -3.14943       -1.84278        1.77914
H         -1.42202       -2.04965        1.81571
H         -0.76965        1.36986        1.55332
H         -0.03031       -0.15492        2.02919
S         -5.17733       -1.62317       -0.40606
O         -4.26500       -2.61739       -0.99978
O         -5.03395       -1.45854        1.05105
O         -5.18783       -0.34703       -1.14667
H         -4.02762        0.18909        1.35066
O         -6.67464       -2.25085       -0.54507
H         -6.80257       -2.48366       -1.47415
