# Supplementary material for: Role of base strength, cluster structure and charge in sulfuric-acid-driven particle formation
Source: Copernicus journal article supplement (doi:10.5194/acp-19-9753-2019), 2019-08-02
Supplement: Supplementary file 1 [file acp-19-9753-2019-supplement.zip › Acid-Base-Ions_xyz/1b3a3n.xyz]

39
1b3a3n.log	Energy: -1863658.2444693
S          1.93802        2.49737       -0.19629
O          2.28338        2.34322        1.22829
O          3.29190        3.07409       -0.89715
O          1.73117        1.22416       -0.91388
H          3.71136        3.67250       -0.26549
S         -3.78876       -0.19748       -1.22303
O         -2.53429        0.18140       -1.95589
O         -3.59151       -1.72686       -0.77802
O         -3.86483        0.59490        0.04171
H         -2.91068       -1.77754       -0.06254
S         -1.37751       -0.56446        1.99729
O         -0.70828       -0.91715        3.25046
O         -1.62229       -1.71064        1.08234
O         -0.65971        0.52839        1.28219
O         -2.80787        0.00026        2.41033
H         -3.31323        0.19626        1.57194
O          0.88534        3.49099       -0.45611
N          1.97802       -0.24848        2.37242
N         -1.63637        2.32044       -0.48091
N         -0.06029       -1.02227       -1.24740
H         -1.37518        1.68712        0.30933
H         -1.92031        1.68033       -1.25152
H         -2.44085        2.87857       -0.21151
H         -0.80496        2.89642       -0.69199
H         -0.89111       -0.76745       -1.79943
H         -0.37266       -1.54745       -0.42066
H          0.67335       -1.55719       -1.75332
H          0.38906       -0.16267       -0.90555
H          1.08413       -0.44490        2.85297
H          1.96774        0.71245        1.98652
H          2.08881       -0.94220        1.57332
H          2.75908       -0.34983        3.01319
O         -4.98458       -0.18087       -2.03801
S          3.07666       -2.09356       -0.73417
O          3.82542       -0.64998       -0.72757
O          4.14815       -3.05095       -0.54181
O          2.09913       -2.00885        0.39949
O          2.34020       -2.17169       -2.01607
H          3.16059        0.04457       -0.91746
