# Supplementary material for: Role of base strength, cluster structure and charge in sulfuric-acid-driven particle formation
Source: Copernicus journal article supplement (doi:10.5194/acp-19-9753-2019), 2019-08-02
Supplement: Supplementary file 1 [file acp-19-9753-2019-supplement.zip › Acid-Base-Ions_xyz/1B3A4D.xyz]

67
1B3A4D.log	Energy: -2096442.2882614
S          2.98260        1.86960        0.78566
O          1.57128        2.15494        0.42694
O          2.94144        0.52016        1.66950
O          3.75233        1.48997       -0.44082
O          3.63598        2.85963        1.62348
H          4.20638       -0.09462       -0.51010
N         -0.74803       -0.87179        2.15563
H         -0.07681       -0.82685        1.35064
H         -1.69876       -1.02874        1.75595
O          2.83342       -2.85229        0.16284
O          1.71537       -1.84035       -1.77831
S          1.55302       -2.27011       -0.35062
O          1.26352       -0.98831        0.44305
O          0.41487       -3.20541       -0.15394
H         -1.11395       -2.71571       -0.54794
H          2.31828       -0.12751        1.21342
H          3.95785       -1.75049       -0.16529
N          4.66974       -1.03855       -0.50423
C          5.79330       -0.96597        0.44510
C          5.03391       -1.40074       -1.88577
C         -0.67224        0.38903        2.91978
C         -0.38668       -2.07931        2.92610
H         -0.41290       -2.93593        2.25155
H         -1.10102       -2.21559        3.73995
H          0.62476       -1.95770        3.31822
H         -1.32600        0.32152        3.79230
H         -0.98405        1.20370        2.26784
H          0.36088        0.54975        3.23440
H          5.66889       -0.62121       -2.31235
H          5.56205       -2.35648       -1.88122
H          4.10726       -1.50186       -2.45316
H          6.25831       -1.94987        0.53519
H          6.52163       -0.23382        0.09079
H          5.39711       -0.64508        1.40915
S         -1.60753        2.99507       -0.07520
O         -1.55903        1.49280        0.04956
O         -0.60132        3.53459        1.04822
O         -1.11038        3.42367       -1.38941
O         -2.91633        3.52937        0.31488
H          0.28374        0.96558       -0.99374
N         -4.13697        0.66732       -0.41520
H         -3.12158        0.84866       -0.23294
H         -4.24359       -0.35741       -0.62186
O         -1.93531       -2.23333       -0.85437
O         -4.32857       -2.00260       -0.87200
S         -3.26167       -2.55506        0.00190
O         -3.14500       -1.72237        1.23980
O         -3.31997       -3.98688        0.25059
H          0.29649        3.14292        0.88623
H          1.02090       -0.25386       -1.84875
N          0.48285        0.63624       -1.94945
C          1.30159        1.65040       -2.65015
C         -0.79137        0.32555       -2.63196
C         -4.54744        1.45932       -1.59080
C         -4.87887        0.99504        0.82036
H         -4.55115        0.29791        1.59153
H         -5.94797        0.86559        0.63857
H         -4.64810        2.02555        1.09517
H         -4.39033        2.51729       -1.37500
H         -5.59786        1.25625       -1.80908
H         -3.93461        1.15932       -2.44155
H         -1.36211        1.25073       -2.71990
H         -0.56147       -0.08665       -3.61667
H         -1.33237       -0.41619       -2.04332
H          1.47698        1.30358       -3.67133
H          0.75163        2.59192       -2.64423
H          2.24379        1.76208       -2.11381
