# Supplementary material for: Role of base strength, cluster structure and charge in sulfuric-acid-driven particle formation
Source: Copernicus journal article supplement (doi:10.5194/acp-19-9753-2019), 2019-08-02
Supplement: Supplementary file 1 [file acp-19-9753-2019-supplement.zip › Acid-Base-Ions_xyz/1b3a4g.xyz]

63
1b3a4g.log	Energy: -2272696.4503997
O         -0.97471        3.32640       -2.70871
S          0.23836        2.99555       -1.90837
O         -0.17031        1.91592       -0.89432
O          0.73748        4.18805       -1.16775
O          1.33142        2.38927       -2.74550
H          0.08289        1.45829        0.57530
C          3.03140        2.00749        0.47016
N          3.32334        1.64322       -0.78392
N          3.40007        1.20809        1.49222
N          2.46657        3.18262        0.72945
H          3.59435        0.67390       -0.91016
H          1.96304        3.67029       -0.02955
H          2.04303        3.26932        1.65111
H          3.61035        0.24466        1.25384
H          2.91581        1.37664        2.36707
C         -2.93621        2.32645       -0.22644
N         -2.40954        3.50386        0.13623
N         -3.20813        2.08932       -1.51767
N         -3.27368        1.44018        0.71468
H         -1.96058        4.03408       -0.60231
H         -2.85724        1.57830        1.63264
H         -3.48878        0.49445        0.41509
H         -2.56206        2.53804       -2.18231
H         -3.52578        1.15776       -1.74869
S         -3.62263       -2.39877       -0.35983
O         -3.83754       -2.47842        1.09203
O         -3.63946       -1.03702       -0.91573
O         -2.45988       -3.20080       -0.80629
H         -1.91519        3.49954        1.02655
O         -4.92814       -3.07733       -1.05202
H         -5.04344       -3.95473       -0.66335
C          0.08959       -1.09246       -2.28965
N          1.23130       -0.47181       -2.57000
N          0.04023       -2.43820       -2.27358
N         -1.01517       -0.37677       -2.08553
H          2.08401       -1.01736       -2.56718
H         -0.85837        0.57794       -1.72172
H         -1.86609       -0.84478       -1.79680
H          0.92424       -2.93299       -2.24526
H         -0.78058       -2.86659       -1.85945
S         -0.10164        1.62198        2.79759
O         -1.32858        2.43240        2.63018
O          0.16723        0.88219        1.40337
O          1.09994        2.42273        3.10927
H          2.78878        2.07496       -1.54583
O         -0.27448        0.48098        3.72678
H          1.25668        0.55396       -2.65523
C         -0.23619       -2.32958        2.07214
N         -0.22786       -3.28241        1.12882
N         -1.38359       -1.84477        2.54161
N          0.91997       -1.92319        2.60850
H         -1.06092       -3.41077        0.56049
H          1.76712       -2.14226        2.09480
H          0.87678       -1.07142        3.16236
H         -2.26833       -2.10755        2.11306
H         -1.32329       -0.99398        3.10017
S          3.48626       -2.55529       -0.46224
O          3.97055       -1.19190       -0.17401
O          2.96740       -2.70232       -1.83645
O          4.80491       -3.51445       -0.38742
H          5.43204       -3.19576       -1.05004
O          2.62896       -3.13167        0.58151
H          0.67169       -3.49431        0.70838
