# Supplementary material for: Role of base strength, cluster structure and charge in sulfuric-acid-driven particle formation
Source: Copernicus journal article supplement (doi:10.5194/acp-19-9753-2019), 2019-08-02
Supplement: Supplementary file 1 [file acp-19-9753-2019-supplement.zip › Acid-Base-Ions_xyz/1b3a4n.xyz]

43
1b3a4n.log	Energy: -1899167.3895710
N          0.85875       -3.00203        1.16993
H          1.08359       -3.92828        1.51962
H          1.58274       -2.68164        0.48893
H         -0.04749       -3.02600        0.64507
H          0.77327       -2.32190        1.94620
N         -3.13200        1.15112       -0.37168
H         -3.03198        0.30806       -0.97764
H         -4.05421        1.16333        0.05354
H         -2.41302        1.03549        0.37581
H         -2.95002        2.03147       -0.88097
N          0.17775       -0.63902       -1.76998
H          0.86132       -1.37677       -1.96037
H          0.31957       -0.37761       -0.76609
H          0.37624        0.19899       -2.31120
H         -0.80195       -0.94730       -1.88818
N          2.24793        2.31676        0.21066
H          1.73619        3.09878       -0.24422
H          1.64682        1.96780        0.98269
H          2.41950        1.53898       -0.46548
H          3.13910        2.62936        0.58469
S         -0.02206        0.15028        1.96785
O          0.33439        1.57877        2.27425
O          0.23600       -0.79125        3.07836
O          0.85427       -0.27764        0.79963
O         -1.46376        0.08782        1.52948
H         -2.36258       -1.22724        1.14366
H          2.49561       -0.48271        1.00652
S         -0.79349        3.30023       -0.64358
O         -0.37970        1.91721       -0.97797
O          0.35084        4.23346       -0.69928
O         -2.01752        3.71644       -1.34374
O         -1.28660        3.24274        0.89628
H         -0.68056        2.67713        1.44549
S          3.49268       -1.02197       -0.77901
O          4.87767       -1.34595       -1.06177
O          3.45241       -0.65937        0.80119
O          2.96563        0.19269       -1.46300
O          2.53010       -2.15797       -0.92883
S         -2.65535       -2.45658       -0.62539
O         -1.30109       -3.04837       -0.46606
O         -3.71212       -3.39020       -0.95831
O         -3.06365       -1.85456        0.80598
O         -2.56530       -1.27121       -1.54727
