# Supplementary material for: Role of base strength, cluster structure and charge in sulfuric-acid-driven particle formation
Source: Copernicus journal article supplement (doi:10.5194/acp-19-9753-2019), 2019-08-02
Supplement: Supplementary file 1 [file acp-19-9753-2019-supplement.zip › Acid-Base-Ions_xyz/1B4A.xyz]

34
1B4A.log	Energy: -2196483.9278823
S          2.83218       -3.08256       -0.26155
S         -5.04063       -0.73674        0.16509
S         -1.27908       -0.69018        0.06145
S          0.29995        3.50395       -0.41840
O         -1.91290       -1.56780       -0.92624
O          0.19175       -0.63508       -0.03539
O         -1.88578        0.68087        0.05040
O         -6.47336       -0.74086        0.20419
O         -4.27502       -1.17006        1.33367
O          2.37536       -2.68778        1.05604
O          2.98801       -4.46135       -0.63755
O          1.59854        3.96818        0.07165
O         -0.67414        4.47399       -0.83430
O         -1.54341       -1.27931        1.51252
O         -4.57540        0.72724       -0.21303
O         -4.59514       -1.61016       -1.07441
O          4.23870       -2.39831       -0.55052
O          1.88517       -2.39022       -1.33829
O         -0.23443        2.57253        0.73023
O          0.51204        2.51552       -1.63138
H         -3.58863        0.80656       -0.12550
H         -3.60351       -1.68571       -1.09467
H         -2.52100       -1.32764        1.63494
H          1.24027       -1.79266       -0.89462
H          4.29292       -1.52007       -0.11036
H          1.24635        1.88010       -1.42539
H         -0.93788        1.92389        0.42690
S          3.14485        0.93213        0.47072
O          3.51511        2.36709        0.96655
O          2.02466        0.52086        1.48568
O          4.32536        0.11298        0.65154
O          2.57342        0.98305       -0.87336
H          2.79568        3.01236        0.70452
H          1.29134        0.02674        1.02302
