# Supplementary material for: Role of base strength, cluster structure and charge in sulfuric-acid-driven particle formation
Source: Copernicus journal article supplement (doi:10.5194/acp-19-9753-2019), 2019-08-02
Supplement: Supplementary file 1 [file acp-19-9753-2019-supplement.zip › Acid-Base-Ions_xyz/1B4A1D.xyz]

44
1B4A1D.log	Energy: -2281322.4773437
S         -2.53993       -3.16608       -0.12804
O         -3.39710       -4.31679       -0.06500
O         -3.03954       -2.25453       -1.32142
O         -2.38223       -2.31871        1.05052
H         -2.50137       -1.40742       -1.34197
S         -0.12373       -0.22306       -0.76728
O         -0.07766       -0.14624        0.71176
O          0.64863        0.89908       -1.39664
O         -1.57506       -0.08727       -1.20280
O          0.39695       -1.54707       -1.24746
N         -2.52489        0.45488        1.70325
C         -3.99256        0.32569        1.61708
H         -4.32263       -0.45130        2.30689
H         -4.25467        0.04219        0.59800
H         -4.44766        1.28504        1.86608
C         -2.00693        0.82415        3.04120
H         -0.92215        0.92973        2.98594
H         -2.27412        0.03998        3.75088
H         -2.45431        1.77388        3.33756
H         -2.09167       -0.42900        1.40014
H         -2.21665        1.17077        1.02539
O         -1.11920       -3.66205       -0.60181
H         -0.50005       -2.89775       -0.77651
S         -1.89974        3.28474       -1.14530
O         -2.19423        2.76049        0.18877
O         -2.45371        4.55070       -1.53403
O         -0.33731        3.37233       -1.32643
O         -2.34826        2.20423       -2.20605
H          0.08816        2.47159       -1.25082
H         -2.06955        1.29078       -1.89653
S          2.34201        0.48539        2.95018
O          1.26974        1.28126        3.51470
O          3.48988        0.15478        3.75854
O          2.77470        1.24598        1.62260
O          1.78026       -0.88289        2.38962
H          1.06897       -0.69658        1.71501
H          3.21617        0.63667        0.98439
S          3.76116       -0.60697       -1.70028
O          2.86475       -1.80066       -2.21530
O          3.10098        0.67015       -2.35539
O          3.60569       -0.51921       -0.25136
O          5.06542       -0.76362       -2.27795
H          1.95103       -1.75280       -1.81790
H          2.18378        0.80703       -1.98645
