# Supplementary material for: Role of base strength, cluster structure and charge in sulfuric-acid-driven particle formation
Source: Copernicus journal article supplement (doi:10.5194/acp-19-9753-2019), 2019-08-02
Supplement: Supplementary file 1 [file acp-19-9753-2019-supplement.zip › Acid-Base-Ions_xyz/1b4a1g.xyz]

43
1b4a1g.log	Energy: -2325387.8976206
O          4.04630       -0.39914        0.55891
S          4.71806       -0.14920       -0.71558
O          4.42112        1.34549       -1.13023
O          4.02027       -1.00494       -1.84312
O          6.13164       -0.37411       -0.82579
H          3.46271        1.56155       -0.93672
C          1.36499       -0.37226        2.58150
N          1.96913        0.80706        2.37885
N          0.12009       -0.40846        3.06609
N          2.03817       -1.51286        2.39330
H          1.35191        1.59848        2.23752
H          2.87592       -1.45348        1.82509
H          1.46627       -2.34431        2.26997
H         -0.45454        0.41093        2.90175
H         -0.36468       -1.29687        3.00833
S         -1.70515        3.01473        1.19993
O         -0.77431        2.03721        1.75608
O         -1.18772        3.44434       -0.22321
O         -3.08388        2.29494        0.90969
H         -2.98653        1.44471        0.41103
O         -2.01435        4.21063        1.93177
H          2.77094        0.78408        1.75796
S         -1.41126       -2.97670        0.96148
O         -2.28817       -4.10112        0.71867
O         -0.30636       -3.17006        1.90541
O         -0.92732       -2.34985       -0.34174
H         -0.00574       -1.08422       -0.23069
O         -2.26278       -1.78392        1.65363
H         -2.66994       -1.22417        0.95895
S          0.93378        0.67766       -1.17250
O          0.54825       -0.27593        0.01619
O          1.86489        1.64866       -0.57162
O          1.51435       -0.14438       -2.24657
H          3.06238       -0.75283       -1.97337
O         -0.32721        1.36242       -1.60525
H         -0.78953        2.67513       -0.72282
S         -3.32579       -0.40671       -1.79289
O         -4.69405       -0.38310       -2.22037
O         -3.00505       -0.06619       -0.38545
O         -2.71960       -1.81425       -2.07319
H         -1.98853       -2.07450       -1.40562
O         -2.52436        0.57778       -2.71063
H         -1.62001        0.79667       -2.33091
