# Supplementary material for: Role of base strength, cluster structure and charge in sulfuric-acid-driven particle formation
Source: Copernicus journal article supplement (doi:10.5194/acp-19-9753-2019), 2019-08-02
Supplement: Supplementary file 1 [file acp-19-9753-2019-supplement.zip › Acid-Base-Ions_xyz/1b4a1n.xyz]

38
1b4a1n.log	Energy: -2232001.8437591
S         -0.38374       -0.23593       -0.92786
O         -1.87199       -0.03111       -1.10638
O         -0.08043       -1.68416       -1.19464
O          0.34493        0.63910       -1.91002
O          0.00277        0.12505        0.45572
N         -1.70721        0.75306        2.34820
H         -0.76225        0.66716        2.77165
H         -1.65562        1.44524        1.58289
H         -2.38297        1.04767        3.04710
H         -1.97751       -0.16381        1.95433
S         -2.93365       -2.80249        0.57019
S          2.11517        0.80748        2.76415
S          3.33424       -1.18026       -1.62839
S         -1.72524        3.36657       -0.92411
O          0.85945        0.68283        3.50246
O          3.23785        1.40410        3.43692
O         -2.61925       -1.79746        1.58354
O          3.16964       -0.52443       -0.33427
O         -2.20004        4.70689       -1.12018
O         -1.52419        2.86970        0.43456
O          4.63850       -1.58741       -2.06610
O          1.87601        1.60505        1.43022
O          2.45382       -0.65512        2.25863
O         -3.84760       -3.85944        0.89870
O         -1.59323       -3.47285        0.07711
O          2.72998       -0.22344       -2.72879
O          2.40111       -2.45262       -1.67274
O         -0.37268        3.22616       -1.72786
O         -2.71208        2.38449       -1.66972
H          1.16180        1.14160        0.89855
H          2.82091       -0.65654        1.34020
H         -0.97775       -2.80627       -0.34318
H          1.85544        0.15759       -2.42973
H          1.45911       -2.20267       -1.44596
H         -0.05053        2.28178       -1.76550
H         -2.44695        1.43451       -1.48341
O         -3.47963       -2.06048       -0.71156
H         -2.90503       -1.26255       -0.91301
