# Supplementary material for: Role of base strength, cluster structure and charge in sulfuric-acid-driven particle formation
Source: Copernicus journal article supplement (doi:10.5194/acp-19-9753-2019), 2019-08-02
Supplement: Supplementary file 1 [file acp-19-9753-2019-supplement.zip › Acid-Base-Ions_xyz/1b4a2g.xyz]

52
1b4a2g.log	Energy: -2454282.8884702
O         -3.45486        2.58749       -2.03195
S         -2.27978        2.28898       -1.25579
O         -1.43574        3.60348       -1.16705
O         -1.28953        1.34902       -2.03267
O         -2.47325        1.72936        0.08922
H         -0.50621        3.45224       -0.81345
C          0.25174       -0.14501        3.16293
N         -0.83083        0.64080        3.16779
N          1.43500        0.37228        3.53592
N          0.14894       -1.44198        2.87980
H         -0.65987        1.62796        3.01328
H         -0.71874       -1.76728        2.46591
H          0.99365       -1.98363        2.71150
H          1.51581        1.38134        3.47599
H          2.27796       -0.13556        3.29289
S         -3.86052       -1.31356        1.20820
O          0.92202        2.95347        2.04713
O         -4.93166       -2.05668        1.81161
O         -2.57173       -1.22093        1.90132
H         -1.65670        0.26042        2.71199
O         -4.39623        0.15360        0.97988
H         -3.69390        0.75502        0.60653
C          2.91963        0.28799       -2.24567
N          1.82920        1.00952       -2.48440
N          3.96215        0.83268       -1.59167
N          3.02424       -0.95633       -2.73258
H          1.69980        1.91525       -2.04584
H          2.14939       -1.36673       -3.06009
H          3.62485       -1.57863       -2.20233
H          3.73297        1.57319       -0.93205
H          4.65355        0.17503       -1.25343
S          1.36953        2.41989        0.75874
O          2.81410        2.04411        0.73121
O          0.54649        1.07495        0.54743
O         -3.61608       -1.88066       -0.22678
H         -2.72698       -1.60255       -0.62601
O          1.03951        3.26447       -0.41612
H          0.99506        0.51311       -2.79142
S          3.18396       -1.52750        0.87109
O          2.85566       -2.50898        1.90195
O          4.25103       -1.87276       -0.07129
O          1.95864       -1.04048        0.13861
H          1.12615        0.28342        0.36004
O          3.68073       -0.24168        1.71335
H          3.39441        0.61494        1.29289
S         -0.61278       -2.07370       -2.17612
O          0.23912       -1.28884       -3.09652
O         -1.41577       -3.12136       -2.76085
O          0.36336       -2.81207       -1.14679
H          0.92767       -2.15770       -0.66696
O         -1.40995       -1.10369       -1.31795
H         -1.35159        0.38287       -1.71461
