# Supplementary material for: Role of base strength, cluster structure and charge in sulfuric-acid-driven particle formation
Source: Copernicus journal article supplement (doi:10.5194/acp-19-9753-2019), 2019-08-02
Supplement: Supplementary file 1 [file acp-19-9753-2019-supplement.zip › Acid-Base-Ions_xyz/1b4a2n.xyz]

42
1b4a2n.log	Energy: -2267513.3517790
S          2.61899        0.19167        1.45281
O          3.08229        0.27415       -0.01116
O          3.22933       -1.02601        2.06542
O          2.99706        1.43756        2.14277
O          1.11604        0.02295        1.42492
N          0.29731        0.33385       -1.15858
H         -0.72187        0.32817       -1.30758
H          0.73721        1.20121       -1.48995
H          0.73082       -0.50341       -1.55920
H          0.50015        0.29793       -0.13466
S          2.84014       -2.94072       -0.79576
S         -2.77056       -1.35827       -0.43542
S         -5.59484        1.02890        0.25822
S          2.69381        3.56470       -0.65490
O         -2.56342        0.00222       -1.01718
O         -1.65938       -2.26562       -0.72314
O          1.53497       -2.33545       -1.06271
O         -4.77999        0.56566        1.38187
O          3.00817        4.82775       -1.26336
O          1.43926        2.89908       -0.99951
O         -6.67158        1.94724        0.48756
O         -4.11420       -1.87952       -0.72846
O         -2.67119       -1.16662        1.16529
O          3.19282       -4.16535       -1.45913
O          2.91846       -3.19860        0.77424
O         -6.19507       -0.23812       -0.47247
O         -4.63313        1.66996       -0.81886
O          2.75836        3.76443        0.90779
O          3.87900        2.56440       -0.95630
H         -3.38378       -0.54104        1.43493
H          3.10088       -2.32848        1.29404
H         -5.48166       -0.92628       -0.59145
H         -3.81519        1.10681       -0.93013
H          2.77444        2.88991        1.40130
H          3.63788        1.65201       -0.60613
O          3.95885       -1.87574       -1.05174
H          3.66309       -0.97567       -0.66241
N          0.08567       -2.45384        1.43928
H         -0.53313       -2.64196        2.22308
H          0.86695       -3.11270        1.40061
H          0.49032       -1.47888        1.52016
H         -0.46079       -2.50327        0.55640
