# Supplementary material for: Role of base strength, cluster structure and charge in sulfuric-acid-driven particle formation
Source: Copernicus journal article supplement (doi:10.5194/acp-19-9753-2019), 2019-08-02
Supplement: Supplementary file 1 [file acp-19-9753-2019-supplement.zip › Acid-Base-Ions_xyz/1b4a3g.xyz]

61
1b4a3g.log	Energy: -2583174.8835206
O          1.20843       -3.20950       -2.73731
S          2.53659       -3.20072       -2.09271
O          3.02211       -1.63148       -2.17429
O          3.57986       -3.96863       -2.74485
O          2.43516       -3.44722       -0.62326
H          2.30204       -1.08788       -2.56247
C         -1.64777        1.93085        1.44262
N         -1.86193        2.74322        0.39521
N         -0.57252        2.11323        2.20837
N         -2.54649        1.00255        1.76222
H         -1.07884        3.32084        0.11028
H         -3.38985        0.88688        1.20364
H         -2.31890        0.29340        2.45393
H          0.15330        2.73234        1.86090
H         -0.35363        1.44586        2.94240
S         -4.33060        0.24202       -1.31484
O         -3.92559       -1.14475       -1.53818
O         -4.83302        0.55865        0.02883
O         -3.30659        1.23636       -1.75607
H         -2.45668        2.39185       -0.35090
O         -5.58090        0.43183       -2.33047
H         -5.94749        1.31503       -2.18877
C         -1.21906       -2.68851       -0.10594
N         -0.14780       -3.17383        0.51883
N         -2.28254       -2.29438        0.61196
N         -1.27087       -2.66673       -1.43614
H         -0.07349       -3.07320        1.52533
H         -0.42398       -2.87452       -1.97470
H         -2.02454       -2.15724       -1.87826
H         -2.16285       -2.08486        1.59743
H         -3.05653       -1.87272        0.11205
S         -0.34971       -1.33833        3.94046
O          0.31295       -0.02821        4.00975
O          0.47080       -2.40953        3.34449
O         -0.51967       -1.72718        5.50894
H         -0.88388       -2.62157        5.55377
O         -1.71663       -1.29261        3.38023
H          0.71937       -3.35281        0.00313
C          2.84469       -0.25440        1.23718
N          2.57571       -1.54194        1.42411
N          3.44950        0.14819        0.11569
N          2.59006        0.63549        2.20782
H          2.65968       -2.20407        0.64502
H          1.96051        0.37433        2.95978
H          2.69888        1.61769        1.97737
H          3.46861       -0.48698       -0.68093
H          3.50280        1.14512       -0.05621
S          0.11905        0.75509       -2.18503
O          1.23240        0.25613       -2.97494
O          0.08193        0.42814       -0.77124
O         -0.00875        2.31789       -2.37443
H          2.01102       -1.82549        2.21825
O         -1.18760        0.29962       -2.91306
H         -2.01456        0.66208       -2.46450
S          2.15969        3.87789       -0.01555
O          3.13251        3.06251        0.73359
O          0.85399        4.03228        0.63357
O          2.74737        5.39317       -0.00421
H          3.61996        5.37253       -0.41986
O          2.09092        3.49685       -1.44485
H          0.81220        2.78544       -2.02176
