# Supplementary material for: Role of base strength, cluster structure and charge in sulfuric-acid-driven particle formation
Source: Copernicus journal article supplement (doi:10.5194/acp-19-9753-2019), 2019-08-02
Supplement: Supplementary file 1 [file acp-19-9753-2019-supplement.zip › Acid-Base-Ions_xyz/1b4a3n.xyz]

46
1b4a3n.log	Energy: -2303030.2405421
S          1.40674        0.23897        0.34976
O          2.72763        0.88203        0.00720
O          1.63328       -0.96469        1.20625
O          0.55716        1.23412        1.10312
O          0.68623       -0.15841       -0.89955
N         -1.51319        1.54433       -1.21317
H         -2.23575        1.54220       -0.46097
H         -0.90700        2.37782       -1.16304
H         -1.98780        1.50191       -2.11117
H         -0.89698        0.71534       -1.11990
S          4.62588       -2.10923        0.12075
S         -2.35031       -2.54614       -0.59641
S         -4.70997        0.58895        0.43424
S          1.49802        4.14583       -0.40041
O         -2.44449       -1.20283       -1.22961
O         -1.87102       -3.59948       -1.48900
O          3.63797       -2.65607       -0.80917
O         -3.45037        1.35153        0.76565
O          1.72678        5.56173       -0.46494
O          0.48557        3.54347       -1.26670
O         -5.92492        1.34539        0.63258
O         -1.55127       -2.47313        0.66450
O          5.89862       -2.76170        0.25343
O          3.96828       -2.02011        1.55175
O         -4.64556       -0.74522        1.08538
O         -4.61455        0.32493       -1.15284
O          1.15809        3.77072        1.09520
O          2.87795        3.43012       -0.66543
H          3.05326       -1.59811        1.48432
H         -3.87902       -0.32225       -1.30576
H          0.92191        2.79486        1.15862
H          2.81714        2.44572       -0.48607
O          4.90224       -0.60437       -0.26313
H          4.06703       -0.05141       -0.22739
N          0.83149       -2.89183       -0.81683
H          0.43253       -2.95645        0.12514
H          1.83660       -3.10972       -0.82190
H          0.73154       -1.88391       -1.06803
H          0.25205       -3.47069       -1.42999
N         -1.64606       -0.17055        2.12543
H         -1.61936       -1.08066        1.60433
H         -0.75595        0.33408        1.96646
H         -1.80418       -0.34114        3.11332
H         -2.42192        0.40774        1.72464
O         -3.83263       -2.95494       -0.18692
H         -4.23545       -2.19772        0.32035
