# Supplementary material for: Role of base strength, cluster structure and charge in sulfuric-acid-driven particle formation
Source: Copernicus journal article supplement (doi:10.5194/acp-19-9753-2019), 2019-08-02
Supplement: Supplementary file 1 [file acp-19-9753-2019-supplement.zip › Acid-Base-Ions_xyz/1b4a4g.xyz]

70
1b4a4g.log	Energy: -2712071.2599990
O         -6.28467        1.83931        0.15343
S         -5.24722        0.82695        0.11882
O         -5.45039        0.05802       -1.28732
O         -5.35373       -0.21557        1.17567
O         -3.85401        1.36279        0.05166
H         -4.74377       -0.62452       -1.35000
C          3.63967        1.08888       -0.21740
N          4.07397       -0.16291       -0.04828
H          4.06800       -0.57163        0.88343
H          4.06280       -0.81029       -0.83334
N          3.46216        1.57290       -1.45019
H          3.41297        0.91663       -2.22602
H          2.95585        2.45008       -1.55907
N          3.45565        1.87968        0.84319
H          3.43742        1.46181        1.77085
H          2.95640        2.76070        0.73046
C         -0.73370        1.44015        2.15989
N         -0.98611        0.19758        2.57959
H         -1.70324       -0.35419        2.10584
H         -0.23668       -0.32414        3.02229
N          0.42214        2.03614        2.49728
H          1.18011        1.48514        2.88928
H          0.68174        2.90331        2.03725
N         -1.64344        2.11560        1.46978
H         -2.52422        1.68730        1.15811
H         -1.36778        2.96904        0.99640
C          0.84476       -3.26602        0.44989
N          0.21849       -3.20298        1.63179
H          0.72558       -2.79750        2.41236
H         -0.77716       -2.97064        1.59507
N          0.16214       -3.60036       -0.64350
H         -0.84571       -3.77324       -0.57611
H          0.57631       -3.43618       -1.55474
N          2.16503       -3.06010        0.38178
H          2.64919       -2.64651        1.17363
H          2.63121       -3.02448       -0.51948
C         -0.79227        0.73001       -2.25503
N          0.34798        1.24439       -2.74252
H          0.61030        2.19907       -2.51969
H          1.08052        0.62584       -3.07681
N         -1.02784       -0.57490       -2.36932
H         -0.29456       -1.18797       -2.70822
H         -1.85889       -0.98806       -1.93163
N         -1.69713        1.53916       -1.71144
H         -1.44415        2.50164       -1.51914
H         -2.53452        1.19260       -1.23393
S          0.88430        4.36177       -0.56737
O          1.58029        4.12545        0.71645
O          1.56421        3.75473       -1.72243
O         -0.56084        4.08506       -0.49147
O          1.01817        5.95021       -0.87351
H          0.42858        6.41950       -0.26777
S         -3.11747       -2.48793        0.10523
O         -2.20689       -1.85517        1.09535
O         -3.29871       -1.61463       -1.09258
O         -2.68183       -3.84850       -0.23931
O         -4.53668       -2.63376        0.77380
H         -4.89759       -1.70601        0.97129
S          2.67432       -1.83858       -3.18729
O          3.55811       -2.23096       -2.08012
O          1.30222       -2.37306       -3.09520
O          2.69680       -0.39018       -3.48346
O          3.35883       -2.57096       -4.46225
H          2.80260       -2.40622       -5.23595
S          2.78314       -0.86113        3.50224
O          1.40396       -1.36124        3.64980
O          3.57731       -1.55482        2.47688
O          2.84307        0.61265        3.40267
O          3.55710       -1.25490        4.87126
H          3.05474       -0.89196        5.61363
