# Supplementary material for: Role of base strength, cluster structure and charge in sulfuric-acid-driven particle formation
Source: Copernicus journal article supplement (doi:10.5194/acp-19-9753-2019), 2019-08-02
Supplement: Supplementary file 1 [file acp-19-9753-2019-supplement.zip › Acid-Base-Ions_xyz/1b4a4n.xyz]

50
1b4a4n.log	Energy: -2338531.9408840
N         -2.37951       -2.31678       -1.09634
H         -3.13792       -1.71985       -1.50490
H         -2.76088       -3.22766       -0.86068
H         -1.57989       -2.39827       -1.75612
H         -2.05838       -1.84063       -0.22543
N         -1.50459        1.37323       -0.89747
H         -2.50239        1.15415       -0.70690
H         -0.93916        0.51934       -1.03496
H         -1.37378        1.98991       -1.69867
H         -1.09249        1.85361       -0.08506
N          1.15681        0.13843        1.65362
H          1.02219        1.13759        1.42130
H          2.12388       -0.03761        1.93899
H          0.47889       -0.13311        2.38732
H          0.95415       -0.39011        0.79088
N          3.79768        0.67894       -1.82962
H          3.27494        1.44163       -1.35309
H          4.45301        0.24177       -1.14743
H          3.13621       -0.04485       -2.19533
H          4.32010        1.07493       -2.60528
S          0.98544       -1.63982       -2.02734
O          0.57752       -0.55410       -1.09174
O          2.12025       -1.22842       -2.87610
O          1.48635       -2.85269       -1.10792
O         -0.14891       -2.21726       -2.76101
H          2.23168       -2.53902       -0.54283
S         -4.96680       -0.08986       -0.60638
O         -4.32102       -0.54807       -1.86233
O         -6.36621        0.26675       -0.71974
O         -4.86470       -1.39214        0.35133
O         -4.11454        0.95551        0.05295
H         -4.41036       -1.21175        1.21259
S          4.57475       -1.29100        1.00735
O          3.24910       -1.55889        0.41663
O          5.42977       -0.50057        0.10088
O          4.12086       -0.23247        2.21039
O          5.23528       -2.38880        1.69376
H          4.76394       -0.30188        2.92675
S         -2.12207       -0.40470        2.31533
O         -1.53824       -0.72714        0.98120
O         -1.09672       -0.41167        3.36432
O         -2.57362        1.13735        2.22297
O         -3.34471       -1.18254        2.58544
H         -3.30303        1.18017        1.55744
S          1.26266        3.28309       -0.47861
O          0.56734        3.24001       -1.75884
O          2.65974        2.80319       -0.48541
O          1.35487        4.87438       -0.14680
O          0.49231        2.69757        0.65275
H          1.76515        4.97144        0.72275
