# Supplementary material for: Role of base strength, cluster structure and charge in sulfuric-acid-driven particle formation
Source: Copernicus journal article supplement (doi:10.5194/acp-19-9753-2019), 2019-08-02
Supplement: Supplementary file 1 [file acp-19-9753-2019-supplement.zip › Acid-Base-Ions_xyz/1D.xyz]

10
1D.log	Energy:  -84798.1837772
N          0.02648        0.58063        0.00000
C          0.02648       -0.22189        1.21069
C          0.02648       -0.22189       -1.21069
H         -0.77099        1.20601        0.00000
H          0.96371       -0.78592        1.27018
H         -0.02481        0.42994        2.08688
H         -0.80499       -0.94789        1.26457
H          0.96371       -0.78592       -1.27018
H         -0.80499       -0.94789       -1.26457
H         -0.02481        0.42994       -2.08688
