# Supplementary material for: Role of base strength, cluster structure and charge in sulfuric-acid-driven particle formation
Source: Copernicus journal article supplement (doi:10.5194/acp-19-9753-2019), 2019-08-02
Supplement: Supplementary file 1 [file acp-19-9753-2019-supplement.zip › Acid-Base-Ions_xyz/1D1P.xyz]

11
1D1P.log	Energy:  -85031.6202119
N          0.00000       -0.00000        0.54036
C          0.00000        1.25787       -0.27494
C         -0.00000       -1.25787       -0.27494
H          0.81607        0.00000        1.15788
H         -0.81607        0.00000        1.15788
H          0.89360        1.26489       -0.89823
H         -0.89360        1.26489       -0.89823
H          0.89360       -1.26489       -0.89823
H         -0.89360       -1.26489       -0.89823
H          0.00000        2.11551        0.39696
H         -0.00000       -2.11551        0.39696
