# Supplementary material for: Role of base strength, cluster structure and charge in sulfuric-acid-driven particle formation
Source: Copernicus journal article supplement (doi:10.5194/acp-19-9753-2019), 2019-08-02
Supplement: Supplementary file 1 [file acp-19-9753-2019-supplement.zip › Acid-Base-Ions_xyz/1g.xyz]

9
1g.log	Energy: -128845.0072951
C          0.01635        0.12082        0.00012
N          0.20389        1.38683        0.01002
N          0.98291       -0.88091        0.07293
N         -1.27087       -0.39317       -0.07934
H          1.19226        1.61958       -0.04632
H         -1.96950        0.33202        0.00265
H         -1.45399       -1.19129        0.51269
H          1.93610       -0.56529       -0.02370
H          0.78554       -1.70917       -0.47128
