# Supplementary material for: Role of base strength, cluster structure and charge in sulfuric-acid-driven particle formation
Source: Copernicus journal article supplement (doi:10.5194/acp-19-9753-2019), 2019-08-02
Supplement: Supplementary file 1 [file acp-19-9753-2019-supplement.zip › Acid-Base-Ions_xyz/1g1p.xyz]

10
gua+.log	Energy: -129092.7551105
C         -0.00011        0.00003        0.00006
N          0.80555        1.06242       -0.00027
N         -1.32293        0.16628        0.00002
N          0.51743       -1.22877       -0.00027
H          0.45137        1.99072       -0.17358
H          1.49841       -1.38590       -0.17404
H         -0.05509       -2.04026        0.17550
H         -1.73945        1.06813        0.17431
H         -1.94956       -0.60453       -0.17434
H          1.79459        0.97214        0.17544
