# Supplementary material for: Role of base strength, cluster structure and charge in sulfuric-acid-driven particle formation
Source: Copernicus journal article supplement (doi:10.5194/acp-19-9753-2019), 2019-08-02
Supplement: Supplementary file 1 [file acp-19-9753-2019-supplement.zip › Acid-Base-Ions_xyz/1n.xyz]

4
1N.log	Energy:  -35483.4633449
N          0.00000        0.00000        0.10697
H         -0.00000        0.94851       -0.24960
H          0.82143       -0.47425       -0.24960
H         -0.82143       -0.47425       -0.24960
