# Supplementary material for: Role of base strength, cluster structure and charge in sulfuric-acid-driven particle formation
Source: Copernicus journal article supplement (doi:10.5194/acp-19-9753-2019), 2019-08-02
Supplement: Supplementary file 1 [file acp-19-9753-2019-supplement.zip › Acid-Base-Ions_xyz/1n1p.xyz]

5
1N1P.log	Energy:  -35698.9771354
N          0.00000        0.00000        0.00000
H          0.59159        0.59159        0.59159
H         -0.59159       -0.59159        0.59159
H          0.59159       -0.59159       -0.59159
H         -0.59159        0.59159       -0.59159
