# Supplementary material for: Role of base strength, cluster structure and charge in sulfuric-acid-driven particle formation
Source: Copernicus journal article supplement (doi:10.5194/acp-19-9753-2019), 2019-08-02
Supplement: Supplementary file 1 [file acp-19-9753-2019-supplement.zip › Acid-Base-Ions_xyz/2A.xyz]

14
2A.log	Energy: -878690.2326939
S         -2.07594        0.06763        0.12454
O         -1.43975        0.94519       -1.01327
O         -1.09847       -0.15332        1.17802
O         -2.22729       -1.37373       -0.56082
O         -3.37085        0.60981        0.41502
H         -0.48029        0.71308       -1.13477
H         -2.98723       -1.37094       -1.16211
S          2.07594       -0.06763       -0.12454
O          2.22725        1.37374        0.56080
O          1.09848        0.15328       -1.17803
O          1.43977       -0.94518        1.01328
O          3.37087       -0.60979       -0.41500
H          2.98719        1.37099        1.16210
H          0.48030       -0.71310        1.13477
