# Supplementary material for: Role of base strength, cluster structure and charge in sulfuric-acid-driven particle formation
Source: Copernicus journal article supplement (doi:10.5194/acp-19-9753-2019), 2019-08-02
Supplement: Supplementary file 1 [file acp-19-9753-2019-supplement.zip › Acid-Base-Ions_xyz/2A1D.xyz]

24
2A1D.log	Energy: -963530.0926211
S          1.50001       -1.21710       -0.09059
O          2.35480       -0.22919       -0.75819
O          0.87950       -0.66581        1.14507
O          2.53973       -2.35561        0.37212
O          0.51033       -1.89823       -0.94487
H          1.72595        1.34613       -0.36676
H          2.04518       -3.16010        0.58269
S         -2.27499       -0.03245        0.00375
O         -1.73572       -0.59298        1.37697
O         -3.68288        0.19342        0.12943
O         -2.06133       -1.21699       -1.01125
O         -1.40666        1.08023       -0.40000
H         -0.73663       -0.66599        1.35617
H         -1.09766       -1.46913       -1.07213
N          1.09964        2.12741       -0.07671
H          0.15062        1.70233       -0.08217
C          1.13534        3.21089       -1.08216
H          2.13940        3.63507       -1.12224
H          0.41366        3.97998       -0.80502
H          0.86959        2.79109       -2.05193
C          1.43958        2.54180        1.30277
H          2.44082        2.97450        1.31063
H          1.40880        1.65435        1.93478
H          0.71079        3.27781        1.64454
