# Supplementary material for: Role of base strength, cluster structure and charge in sulfuric-acid-driven particle formation
Source: Copernicus journal article supplement (doi:10.5194/acp-19-9753-2019), 2019-08-02
Supplement: Supplementary file 1 [file acp-19-9753-2019-supplement.zip › Acid-Base-Ions_xyz/2A1D1P.xyz]

25
2A1D1P.log	Energy: -963741.5778829
S         -1.67343       -1.17930        0.01139
O         -2.92741       -0.63502        0.46314
O         -1.90428       -2.50903       -0.81622
O         -0.79245       -0.37278       -0.82211
H         -0.25953        2.98098       -0.50283
H         -2.63396       -3.02996       -0.44278
S          2.29603       -0.00532       -0.00448
O          3.78091        0.33175        0.42918
O          1.73638       -0.95128        0.93673
O          2.47115       -0.82200       -1.35122
O          1.67357        1.26937       -0.26140
H          4.22630       -0.44802        0.80068
H          2.68186       -0.23836       -2.09787
N         -1.01646        2.36146       -0.20953
H         -0.74210        1.41106       -0.51695
C         -2.29061        2.73151       -0.88607
H         -2.58570        3.73278       -0.57254
H         -3.05037        2.00517       -0.59627
H         -2.13965        2.70119       -1.96458
C         -1.10345        2.35839        1.27829
H         -1.36451        3.35886        1.62302
H         -0.13618        2.05901        1.67982
H         -1.87557        1.64695        1.57357
O         -0.87532       -1.65347        1.28163
H          0.09707       -1.55559        1.14168
