# Supplementary material for: Role of base strength, cluster structure and charge in sulfuric-acid-driven particle formation
Source: Copernicus journal article supplement (doi:10.5194/acp-19-9753-2019), 2019-08-02
Supplement: Supplementary file 1 [file acp-19-9753-2019-supplement.zip › Acid-Base-Ions_xyz/2a1g.xyz]

23
2a1g.log	Energy: -1007586.3848942
C         -1.08750        2.21776       -0.12806
N         -2.34484        2.28360        0.34020
N         -0.07092        2.77348        0.54145
N         -0.86173        1.67494       -1.32154
H         -2.47492        2.60244        1.28752
H         -1.61103        1.14874       -1.75076
H          0.08769        1.36572       -1.51755
H         -0.18196        2.95617        1.52583
H          0.86578        2.52129        0.23524
S         -1.57404       -1.14848        0.02068
O         -0.90956       -0.44444        1.13700
O         -0.63938       -1.51611       -1.06717
O         -2.05820       -2.52528        0.70741
H         -2.53294       -3.05299        0.04966
O         -2.77769       -0.46568       -0.47728
H         -2.94235        1.50456        0.06842
S          2.39942       -0.14932       -0.01047
O          3.81576       -0.18498        0.19642
O          1.81370        1.00440       -0.70856
O          1.97349       -1.45860       -0.76736
H          0.98267       -1.50178       -0.91850
O          1.70205       -0.26634        1.40216
H          0.70688       -0.35387        1.32357
