# Supplementary material for: Role of base strength, cluster structure and charge in sulfuric-acid-driven particle formation
Source: Copernicus journal article supplement (doi:10.5194/acp-19-9753-2019), 2019-08-02
Supplement: Supplementary file 1 [file acp-19-9753-2019-supplement.zip › Acid-Base-Ions_xyz/2a1g1p.xyz]

24
2a1g1p.log	Energy: -1007804.4318468
S          0.26112        0.01423        0.38651
O          1.67727        0.01928        0.69097
O         -0.70420       -0.20143        1.44600
O          0.07479       -1.07465       -0.73414
O         -0.02392        1.38937       -0.32296
H         -0.99851        1.54474       -0.40168
H         -0.88585       -1.25442       -0.88831
S         -3.33093       -0.01517       -0.24013
O         -2.76454        1.31476       -0.42257
O         -2.66603       -1.12562       -0.88916
O         -4.82687       -0.04765       -0.70319
O         -3.52307       -0.29793        1.30068
H         -2.63840       -0.30812        1.72351
H         -5.30298        0.75797       -0.44192
C          4.88016       -0.01625       -0.15989
N          6.18042       -0.03045       -0.47790
H          6.68714        0.82161       -0.65563
H          6.69409       -0.89375       -0.55048
N          4.22717       -1.15763        0.04388
H          4.68183       -2.05063       -0.05262
H          3.24517       -1.13332        0.30029
N          4.22965        1.13944       -0.04879
H          4.70048        2.02249       -0.15838
H          3.24476        1.13736        0.19707
