# Supplementary material for: Role of base strength, cluster structure and charge in sulfuric-acid-driven particle formation
Source: Copernicus journal article supplement (doi:10.5194/acp-19-9753-2019), 2019-08-02
Supplement: Supplementary file 1 [file acp-19-9753-2019-supplement.zip › Acid-Base-Ions_xyz/2a1n.xyz]

18
2a1n.log	Energy: -914204.4523204
S          1.81842       -0.33554       -0.04761
O          2.32619        0.79705       -0.83528
O          1.08901        0.13347        1.16324
O          3.15738       -1.06745        0.45742
O          1.05820       -1.35421       -0.79070
H         -0.27701        2.16928       -0.17595
H          2.93757       -1.97302        0.71825
S         -2.10575       -0.12920       -0.02310
O         -1.47927       -0.40445        1.39978
O         -3.52935       -0.21971        0.08572
O         -1.60489       -1.32798       -0.90968
O         -1.50519        1.10637       -0.54515
H         -0.48999       -0.25323        1.38390
H         -0.60897       -1.34358       -0.96310
N          0.60556        2.71211       -0.02006
H          0.77165        2.77933        0.98257
H          0.54810        3.63502       -0.44211
H          1.38061        2.13259       -0.43446
