# Supplementary material for: Role of base strength, cluster structure and charge in sulfuric-acid-driven particle formation
Source: Copernicus journal article supplement (doi:10.5194/acp-19-9753-2019), 2019-08-02
Supplement: Supplementary file 1 [file acp-19-9753-2019-supplement.zip › Acid-Base-Ions_xyz/2a1n1p.xyz]

19
2a1n1p.log	Energy: -914417.4938872
S          1.92325       -0.26868       -0.04961
O          1.88782        1.16091        0.17539
O          1.60056       -1.05323        1.27406
O          1.12579       -0.80783       -1.14039
H          0.82898        2.58085        0.03388
H          0.62219       -1.07894        1.40495
S         -1.92327       -0.26864        0.04963
O         -1.60069       -1.05297       -1.27421
O         -1.12590       -0.80814        1.14030
O         -3.43614       -0.63025        0.23012
O         -1.88764        1.16099       -0.17508
H         -0.62233       -1.07871       -1.40514
H         -3.56424       -1.56067        0.48060
N          0.00016        3.20300        0.00000
H         -0.82871        2.58092       -0.03381
O          3.43607       -0.63047       -0.23019
H          3.56405       -1.56088       -0.48074
H         -0.03145        3.79075        0.83321
H          0.03181        3.79066       -0.83326
