# Supplementary material for: Role of base strength, cluster structure and charge in sulfuric-acid-driven particle formation
Source: Copernicus journal article supplement (doi:10.5194/acp-19-9753-2019), 2019-08-02
Supplement: Supplementary file 1 [file acp-19-9753-2019-supplement.zip › Acid-Base-Ions_xyz/2A2D.xyz]

34
2A2D.log	Energy: -1048361.1653637
S         -1.51293        1.55278       -0.53665
O         -0.47044        2.56603       -0.82332
O         -1.32120        0.37509       -1.63558
O         -1.19673        0.88159        0.77182
O         -2.89303        1.96211       -0.68520
H         -1.58741       -0.67698        0.77326
N          1.62763        1.81460        0.73625
H          0.86938        2.10510        0.06940
H          1.52467        0.79008        0.86044
O          0.48943       -2.57268       -0.54534
O          1.69157       -1.00539        0.95374
S          1.49581       -1.50099       -0.41747
O          1.30871       -0.41226       -1.40182
O          2.92258       -2.18540       -0.76604
H          2.85148       -2.61505       -1.62969
H         -0.36760        0.13008       -1.68469
H         -1.08445       -2.11362        0.10743
N         -1.82341       -1.70775        0.71288
C         -3.15274       -1.84389        0.08119
C         -1.69893       -2.30545        2.05701
C          1.38041        2.48506        2.02867
C          2.94830        2.08305        0.13294
H          3.00868        1.52790       -0.80311
H          3.73231        1.74924        0.81447
H          3.04509        3.15301       -0.05711
H          1.45904        3.56457        1.89227
H          2.11445        2.14454        2.76093
H          0.37119        2.22503        2.34780
H         -2.39658       -1.81124        2.73481
H         -1.92060       -3.37270        2.00514
H         -0.67451       -2.15778        2.40040
H         -3.39761       -2.90145       -0.03136
H         -3.89588       -1.34945        0.70825
H         -3.11672       -1.35313       -0.89160
