# Supplementary material for: Role of base strength, cluster structure and charge in sulfuric-acid-driven particle formation
Source: Copernicus journal article supplement (doi:10.5194/acp-19-9753-2019), 2019-08-02
Supplement: Supplementary file 1 [file acp-19-9753-2019-supplement.zip › Acid-Base-Ions_xyz/2A2D1P.xyz]

35
2A2D1P.log	Energy: -1048594.2600499
S          0.54934        2.07719       -0.25395
C         -3.92290        0.20648       -0.39862
H         -4.65339       -0.53400       -0.07236
H         -4.42165        1.14890       -0.62610
H         -3.38253       -0.15837       -1.27159
O         -0.87863        2.29797       -0.08555
O          1.31726        1.64048        0.89551
N         -2.94122        0.42683        0.69457
C         -3.53213        0.92367        1.96135
H         -2.43018       -0.46357        0.86533
H         -2.22057        1.08877        0.37013
H         -4.02623        1.87764        1.77613
H         -2.73577        1.05454        2.69340
H         -4.25503        0.19382        2.32608
C          3.85500       -0.50961       -0.48933
H          3.26710       -0.08203       -1.30136
H          4.23713       -1.48742       -0.78234
H          4.68035        0.15499       -0.23274
N          2.97241       -0.67318        0.69418
C          3.64403       -1.23906        1.89022
H          2.16685       -1.27698        0.42608
H          2.54570        0.23689        0.92043
H          2.91474       -1.32426        2.69523
H          4.03502       -2.22558        1.64102
H          4.45854       -0.58001        2.19165
S         -0.57664       -1.91129       -0.36376
O         -1.14402       -3.09361       -1.28299
O         -0.84312       -0.71986       -1.21620
O          0.85418       -2.17785       -0.15535
O         -1.37141       -1.87936        0.87376
H         -1.01749       -3.94623       -0.84037
O          0.80734        1.13980       -1.47466
H          0.15328        0.33670       -1.44955
O          1.24713        3.40801       -0.74323
H          0.72887        3.84280       -1.43911
