# Supplementary material for: Role of base strength, cluster structure and charge in sulfuric-acid-driven particle formation
Source: Copernicus journal article supplement (doi:10.5194/acp-19-9753-2019), 2019-08-02
Supplement: Supplementary file 1 [file acp-19-9753-2019-supplement.zip › Acid-Base-Ions_xyz/2a2g.xyz]

32
2a2g.log	Energy: -1136476.3013383
C         -0.00000       -2.38293       -0.55808
N          0.00000       -1.65570        0.54995
N          1.16298       -2.77324       -1.09810
N         -1.16299       -2.77324       -1.09810
H          0.87117       -1.25497        0.90076
H         -2.03679       -2.31535       -0.81530
H         -1.16132       -3.24056       -1.98885
H          2.03678       -2.31535       -0.81531
H          1.16132       -3.24056       -1.98886
S         -3.36594       -0.00000        0.31575
O         -3.45970        1.23502       -0.48160
O         -3.45970       -1.23502       -0.48160
O         -2.23070       -0.00001        1.26266
H         -0.87116       -1.25497        0.90076
O         -4.64659       -0.00000        1.30801
H         -5.44810       -0.00001        0.76706
C         -0.00000        2.38294       -0.55805
N          0.00000        1.65569        0.54997
N         -1.16299        2.77326       -1.09806
N          1.16298        2.77326       -1.09806
H         -0.87116        1.25495        0.90077
H          2.03678        2.31537       -0.81528
H          1.16132        3.24060       -1.98881
H         -2.03679        2.31537       -0.81527
H         -1.16132        3.24059       -1.98880
S          3.36594       -0.00000        0.31574
O          3.45970       -1.23502       -0.48161
O          3.45969        1.23502       -0.48161
O          2.23070       -0.00001        1.26266
H          0.87117        1.25496        0.90077
O          4.64659       -0.00000        1.30799
H          5.44810       -0.00001        0.76704
