# Supplementary material for: Role of base strength, cluster structure and charge in sulfuric-acid-driven particle formation
Source: Copernicus journal article supplement (doi:10.5194/acp-19-9753-2019), 2019-08-02
Supplement: Supplementary file 1 [file acp-19-9753-2019-supplement.zip › Acid-Base-Ions_xyz/2a2g1p.xyz]

33
2a2g1p.log	Energy: -1136707.0010907
C         -5.19866        0.26052        0.13601
N         -4.56606        0.40989       -1.02319
N         -6.39051        0.84322        0.33810
N         -4.63695       -0.46999        1.09470
H         -4.90750        1.03430       -1.73453
H         -3.66510       -0.05320       -1.14748
H         -3.72369       -0.88875        0.91487
H         -5.12474       -0.68472        1.94811
H         -6.86347        0.77424        1.22399
H         -6.86330        1.33649       -0.40115
C          3.14972       -1.77421       -0.00369
N          4.35563       -1.43810        0.47690
N          2.34690       -2.59773        0.67320
N          2.77152       -1.33592       -1.19978
H          4.63292       -1.75243        1.39292
H          3.36909       -0.72025       -1.72874
H          1.79118       -1.42168       -1.45997
H          2.51499       -2.77442        1.65015
H          1.39797       -2.72122        0.32910
S          2.33626        1.61310        0.14126
O          1.75939        0.71194        1.12639
O          1.51953        1.57664       -1.17729
O          2.08487        3.07110        0.72879
H          2.61499        3.72565        0.24779
O          3.73643        1.47463       -0.20350
H          4.76530       -0.56846        0.16079
S         -0.95522       -0.76009       -0.29929
O         -2.35645       -1.19567       -0.36044
O          0.01506       -1.75349       -0.78514
O         -0.76016        0.58126       -0.91826
H          0.55971        1.19100       -1.06002
O         -0.69933       -0.57189        1.27495
H          0.14006       -0.07853        1.39526
