# Supplementary material for: Role of base strength, cluster structure and charge in sulfuric-acid-driven particle formation
Source: Copernicus journal article supplement (doi:10.5194/acp-19-9753-2019), 2019-08-02
Supplement: Supplementary file 1 [file acp-19-9753-2019-supplement.zip › Acid-Base-Ions_xyz/2a2n.xyz]

22
2a2n.log	Energy: -949710.2104836
N          2.26471        0.00003        0.24476
H          2.08245        0.86240       -0.31528
H          2.08248       -0.86227       -0.31536
H          3.20373        0.00002        0.63143
H          1.56150       -0.00003        0.99604
N         -2.26471       -0.00003        0.24476
H         -3.20373       -0.00002        0.63143
H         -2.08248        0.86227       -0.31536
H         -1.56150        0.00003        0.99604
H         -2.08245       -0.86240       -0.31528
S         -0.00005        2.42917       -0.08206
O         -0.00011        1.60470        1.13584
O         -1.23607        2.28979       -0.88160
O         -0.00011        3.94707        0.48593
O          1.23607        2.28985       -0.88148
H          0.00003        4.55461       -0.26663
S          0.00005       -2.42917       -0.08206
O          0.00011       -1.60470        1.13584
O          1.23607       -2.28979       -0.88160
O          0.00011       -3.94707        0.48593
O         -1.23607       -2.28985       -0.88148
H         -0.00003       -4.55461       -0.26663
