# Supplementary material for: Role of base strength, cluster structure and charge in sulfuric-acid-driven particle formation
Source: Copernicus journal article supplement (doi:10.5194/acp-19-9753-2019), 2019-08-02
Supplement: Supplementary file 1 [file acp-19-9753-2019-supplement.zip › Acid-Base-Ions_xyz/2a2n1p.xyz]

23
2a2n1p.log	Energy: -949939.4072629
S         -2.10095       -0.15483        0.08476
O         -1.85479        0.85892       -0.92344
O         -1.84546       -1.54183       -0.27480
N         -0.14766        3.07170       -0.89681
H         -0.35285        3.83182       -0.24970
H         -0.94557        2.41345       -0.93971
N          0.59953       -2.77545       -1.02848
H          0.52546       -3.37091       -1.85165
H         -0.32279       -2.36879       -0.78946
S          1.99977        0.09206        0.18095
O          3.33124       -0.15600        1.02777
O          1.80982        1.55069        0.11157
O          0.98143       -0.61839        0.99267
O          2.16883       -0.54435       -1.13855
H          4.07462        0.32751        0.63640
O         -3.60832        0.02723        0.50457
H         -3.90317       -0.68099        1.09987
H          0.04222        3.45229       -1.82281
H          0.67902        2.51637       -0.54932
H          0.93118       -3.32060       -0.23313
H          1.27049       -1.98095       -1.19175
O         -1.37621        0.19850        1.41958
H         -0.39524       -0.08675        1.36202
