# Supplementary material for: Role of base strength, cluster structure and charge in sulfuric-acid-driven particle formation
Source: Copernicus journal article supplement (doi:10.5194/acp-19-9753-2019), 2019-08-02
Supplement: Supplementary file 1 [file acp-19-9753-2019-supplement.zip › Acid-Base-Ions_xyz/2A3D.xyz]

44
2A3D.log	Energy: -1133181.3877774
S         -2.28616       -0.05204       -0.00615
O         -3.74244       -0.10145       -0.01972
C          0.52392        3.44686       -0.89809
H          1.18496        3.83587       -1.67555
H         -0.20369        4.20946       -0.61453
H          1.11298        3.14594       -0.03102
N         -0.13562        0.09535        2.65100
H         -0.78174       -0.40074        1.93728
H          0.54606        0.61365        2.07503
C          0.58353       -0.92261        3.43747
C         -0.95054        1.02984        3.45108
H         -1.68236        0.45605        4.02241
H         -1.47138        1.68981        2.75719
H         -0.30833        1.59474        4.13079
H         -0.14457       -1.55230        3.95196
H          1.18035       -1.52259        2.74976
H          1.23390       -0.43694        4.16859
O         -1.75471        1.30237        0.45050
O         -1.68304       -0.31124       -1.38187
N         -0.19482        2.26133       -1.39916
C         -0.99737        2.49167       -2.61573
H          0.48642        1.50272       -1.55635
H         -0.84638        1.88160       -0.62596
H         -1.73446        3.26944       -2.40847
H         -1.50969        1.55911       -2.85307
H         -0.34688        2.80485       -3.43550
C         -0.84223       -3.52429       -0.83439
H         -1.36236       -3.26903        0.08907
H         -0.17807       -4.38000       -0.69300
H         -1.57426       -3.74677       -1.61267
N         -0.05744       -2.34379       -1.24560
C          0.66092       -2.49775       -2.52421
H          0.62029       -2.09057       -0.51016
H         -0.72518       -1.49739       -1.31086
H          1.23466       -1.58815       -2.70296
H          1.33405       -3.35611       -2.47028
H         -0.06770       -2.64808       -3.32281
S          2.33489        0.04340       -0.00559
O          3.95265        0.10159       -0.14020
O          1.96924        1.07811        0.98432
O          2.00928       -1.32164        0.45841
O          1.89524        0.33299       -1.37673
O         -1.67984       -1.09027        0.93329
H          4.33835       -0.09244        0.72455
