# Supplementary material for: Role of base strength, cluster structure and charge in sulfuric-acid-driven particle formation
Source: Copernicus journal article supplement (doi:10.5194/acp-19-9753-2019), 2019-08-02
Supplement: Supplementary file 1 [file acp-19-9753-2019-supplement.zip › Acid-Base-Ions_xyz/2A3D1P.xyz]

45
2A3D1P.log	Energy: -1133435.4179678
S          1.90151       -0.60058       -1.06257
O          0.87303       -1.60020       -0.72547
C          1.24005        3.21814        0.09164
H          2.13276        3.71539       -0.28928
H          0.63233        3.91921        0.66416
H          1.52567        2.36985        0.71177
N          1.25869       -0.77616        2.49027
H          1.82496       -0.59120        1.63709
H          0.41917       -0.17328        2.36149
C          2.00455       -0.32852        3.68845
C          0.84478       -2.19869        2.52059
H          1.73092       -2.82660        2.61989
H          0.33527       -2.42058        1.58463
H          0.17414       -2.35705        3.36553
H          2.91857       -0.91549        3.78397
H          2.25357        0.72621        3.57379
H          1.38069       -0.46550        4.57224
O          2.46768        0.05461        0.13764
O          1.50242        0.37060       -2.09825
N          0.44531        2.70632       -1.04994
C          0.04279        3.73908       -2.03160
H          0.97080        1.94409       -1.52344
H         -0.40240        2.21953       -0.69019
H         -0.56589        4.49231       -1.53039
H         -0.53644        3.26464       -2.82334
H          0.93505        4.20261       -2.45361
C         -1.94077       -3.37143       -1.52426
H         -1.47162       -3.82926       -0.65388
H         -1.47671       -3.75293       -2.43416
H         -3.00879       -3.59120       -1.52959
N         -1.74220       -1.90526       -1.45508
C         -2.31987       -1.15190       -2.59271
H         -0.72333       -1.71068       -1.37490
H         -2.11892       -1.54160       -0.55861
H         -2.15836       -0.09056       -2.41051
H         -1.82615       -1.46366       -3.51361
H         -3.38874       -1.35999       -2.65312
S         -1.86901        0.61630        1.03847
O         -3.18633        1.40367        1.52225
O         -1.68330        1.12839       -0.33206
O         -2.17625       -0.82622        1.08277
O         -0.78399        0.99999        1.96612
H         -3.42132        1.13197        2.42119
O          3.06406       -1.50847       -1.70571
H          3.76433       -0.94110       -2.05908
