# Supplementary material for: Role of base strength, cluster structure and charge in sulfuric-acid-driven particle formation
Source: Copernicus journal article supplement (doi:10.5194/acp-19-9753-2019), 2019-08-02
Supplement: Supplementary file 1 [file acp-19-9753-2019-supplement.zip › Acid-Base-Ions_xyz/2a3g.xyz]

41
2a3g.log	Energy: -1265346.0760776
C          3.48830       -1.63142        0.11496
N          3.27295       -2.79430       -0.51840
N          2.73600       -1.30021        1.16112
N          4.48577       -0.81116       -0.23578
H          2.34638       -3.20694       -0.39666
H          4.97552       -0.95933       -1.10214
H          4.44434        0.14030        0.17852
H          1.89494       -1.84077        1.33261
H          2.80998       -0.33045        1.48044
C         -3.74885       -0.64980        0.42948
N         -3.47429       -0.45624       -0.85674
N         -3.81642       -1.90705        0.90803
N         -4.04730        0.39792        1.20348
H         -2.95186       -1.19110       -1.32483
H         -3.71452        1.31062        0.88222
H         -4.18173        0.26186        2.19130
H         -3.28548       -2.58825        0.36910
H         -3.71623       -2.01684        1.90542
S         -1.18904        2.12669       -0.43835
O         -0.44019        3.37423       -0.58532
O         -2.65273        2.29278       -0.31240
O         -0.85732        1.10818       -1.47680
H         -3.29405        0.49962       -1.15156
O         -0.66209        1.51597        0.95623
H         -0.73741        0.52702        0.95875
C          2.67117        2.18876        0.32375
N          2.19397        1.64840       -0.83490
N          2.25970        3.46405        0.57842
N          3.52065        1.50336        1.04909
H          1.39762        2.09691       -1.26798
H          3.74331       -2.96640       -1.39146
H          3.82421        2.02774        1.86308
H          1.33787        3.71701        0.22694
H          2.48171        3.83258        1.48900
S         -0.41236       -2.07655       -0.12971
O         -0.80354       -1.15980        0.97437
O         -1.58424       -2.64368       -0.82325
O          0.39117       -1.17328       -1.18798
H         -0.10574       -0.31775       -1.34240
O          0.58371       -3.07661        0.29085
H          2.17442        0.64110       -0.88642
