# Supplementary material for: Role of base strength, cluster structure and charge in sulfuric-acid-driven particle formation
Source: Copernicus journal article supplement (doi:10.5194/acp-19-9753-2019), 2019-08-02
Supplement: Supplementary file 1 [file acp-19-9753-2019-supplement.zip › Acid-Base-Ions_xyz/2a3g1p.xyz]

42
2a3g1p.log	Energy: -1265607.6445393
C         -0.36350        2.79652       -0.64267
N          0.77132        3.33901       -1.09766
N         -1.55510        3.24829       -1.03360
N         -0.28294        1.78921        0.22339
H          0.76426        4.07049       -1.78821
H          1.65852        2.93110       -0.81530
H          0.64141        1.43296        0.45706
H         -1.10755        1.33663        0.60126
H         -2.39566        2.72625       -0.77931
H         -1.63250        4.00150       -1.69654
C         -0.00401       -2.24908       -1.64678
N          1.21250       -2.80208       -1.64459
N         -1.10030       -2.98309       -1.44079
N         -0.12254       -0.93775       -1.83441
H          1.34440       -3.78251       -1.46154
H          0.71852       -0.37789       -1.93997
H         -1.05316       -0.53078       -1.84114
H         -1.05435       -3.98418       -1.35208
H         -2.00155       -2.50996       -1.38730
S         -3.25844       -0.07810       -0.02009
O         -3.53984        1.34526       -0.24033
O         -2.93506       -0.81219       -1.26099
O         -2.25428       -0.31143        1.04601
H          2.02437       -2.19500       -1.73568
O         -4.58329       -0.74300        0.59793
H         -5.35266       -0.47973        0.07137
C          0.51259       -0.59107        2.71057
N          1.74063       -0.44008        3.21250
N         -0.56744       -0.17319        3.37808
N          0.36082       -1.19225        1.53260
H          1.89259        0.06042        4.07235
H          1.19898       -1.43208        1.01051
H         -0.55791       -1.18788        1.09587
H         -0.48620        0.30378        4.26033
H         -1.48052       -0.24199        2.93994
S          3.13922        0.13048       -0.28566
O          2.67473       -0.31336       -1.61847
O          3.09892       -0.97329        0.70010
O          4.67094        0.58170       -0.44271
H          5.19288       -0.14339       -0.81594
O          2.49178        1.36289        0.19426
H          2.53352       -0.60332        2.59463
