# Supplementary material for: Role of base strength, cluster structure and charge in sulfuric-acid-driven particle formation
Source: Copernicus journal article supplement (doi:10.5194/acp-19-9753-2019), 2019-08-02
Supplement: Supplementary file 1 [file acp-19-9753-2019-supplement.zip › Acid-Base-Ions_xyz/2a3n.xyz]

26
2a3n.log	Energy: -985213.2752633
S          1.89791       -0.85398       -0.19643
O          1.20651       -0.70015        1.14801
N          0.68129        1.98277        1.38772
H          0.62892        2.44651        2.28954
H          0.89472        0.96625        1.50211
O          3.28898       -0.43020       -0.15794
O          1.19168        0.26715       -1.12266
N          2.86335        2.61314       -0.24597
H          3.56783        3.33119       -0.11414
H          1.46765        2.38257        0.79090
N         -0.75245       -2.51955        0.88726
H         -0.80563       -3.37850        1.42570
H         -1.62881       -1.95820        0.94002
S         -2.30340        0.34223       -0.14158
O         -1.42576       -0.33895       -1.12280
O         -1.83603        1.69916        0.19476
O         -2.63181       -0.51351        1.00794
H          0.23209        0.04788       -1.23209
O          1.58085       -2.16647       -0.76268
H          2.51313        2.68903       -1.19684
H          3.32019        1.69914       -0.19526
H         -0.23659        2.03405        0.90683
H          0.03028       -1.89312        1.21385
H         -0.51342       -2.71889       -0.08826
O         -3.73633        0.53640       -0.86648
H         -3.63259        1.17814       -1.58238
