# Supplementary material for: Role of base strength, cluster structure and charge in sulfuric-acid-driven particle formation
Source: Copernicus journal article supplement (doi:10.5194/acp-19-9753-2019), 2019-08-02
Supplement: Supplementary file 1 [file acp-19-9753-2019-supplement.zip › Acid-Base-Ions_xyz/2a3n1p.xyz]

27
2a3n1p.log	Energy: -985458.2732330
S          2.14405       -0.00957        0.01194
O          1.48415        0.41378       -1.24152
N          0.09749       -2.20447       -1.56540
H          0.98007       -2.19941       -1.01649
H         -0.67442       -2.14304       -0.87441
O          2.02156       -1.45670        0.26441
O          1.73941        0.80980        1.17644
N         -0.08912        2.60643       -0.91235
H          0.41064        3.43384       -0.59342
H          0.58519        1.82848       -1.12315
N         -0.18133       -0.36808        2.72303
H          0.15029       -0.95541        3.48504
H          0.61931        0.09928        2.22949
S         -2.10457       -0.00626       -0.07252
O         -3.67768       -0.26813        0.08501
O         -1.80441        0.21354       -1.48905
O         -1.53172       -1.26801        0.46940
O         -1.76042        1.15691        0.78029
H         -4.18376        0.44233       -0.33594
O          3.68482        0.31627       -0.27774
H          4.23664        0.03698        0.46788
H         -0.73124        2.24578       -0.17424
H         -0.63315        2.81684       -1.74743
H          0.07188       -1.33455       -2.10627
H          0.01390       -3.01860       -2.16934
H         -0.69125       -0.92351        2.00479
H         -0.82096        0.34739        3.06776
