# Supplementary material for: Role of base strength, cluster structure and charge in sulfuric-acid-driven particle formation
Source: Copernicus journal article supplement (doi:10.5194/acp-19-9753-2019), 2019-08-02
Supplement: Supplementary file 1 [file acp-19-9753-2019-supplement.zip › Acid-Base-Ions_xyz/2A4D.xyz]

54
2A4D.log	Energy: -1217996.3761220
S          1.46768       -0.88916        0.44921
O          2.86019       -1.57070        0.74911
O          1.27112        0.20364        1.43612
O          0.47132       -1.96639        0.59616
O          1.55468       -0.34458       -0.93684
H         -0.38820        0.12345        2.15723
N          0.15690        2.11843       -1.06569
H         -0.76142        1.96475       -0.50458
H          0.59887        1.18505       -1.13513
O         -2.89562       -0.48522        0.50284
O         -2.22036        0.37440       -1.68168
S         -2.91449        0.75578       -0.37858
O         -2.01118        1.78250        0.30107
O         -4.26157        1.26639       -0.59513
H         -1.95922       -0.26899        1.70871
N         -1.31505       -0.10810        2.55584
H         -0.82196       -2.09138       -0.63504
N         -1.38278       -2.08567       -1.50442
H         -1.73733       -1.07069       -1.59461
C         -2.54686       -2.98102       -1.36995
C         -0.48958       -2.39801       -2.63376
C          1.03923        3.00016       -0.28376
C         -1.19818       -1.36164        3.32337
H          0.53590        3.95483       -0.11998
H          1.24048        2.51190        0.67049
H          1.97637        3.16611       -0.82167
H          0.35114       -1.70373       -2.60206
H         -0.12053       -3.42181       -2.54101
H         -1.04074       -2.28436       -3.56916
H         -3.15006       -2.61360       -0.53943
H         -3.13163       -2.94033       -2.29083
H         -2.20850       -4.00401       -1.18976
H         -0.75704       -2.11603        2.67181
H         -2.19261       -1.67297        3.64852
H         -0.55561       -1.20353        4.19222
C         -0.18946        2.62379       -2.40706
H         -0.89894        1.92336       -2.84823
H          0.71350        2.71492       -3.01590
H         -0.66718        3.59964       -2.30243
C         -1.83405        1.03837        3.32646
H         -1.14149        1.28330        4.13501
H         -2.80922        0.77426        3.73939
H         -1.94886        1.87347        2.63503
N          4.56916        0.11561       -0.29844
H          4.01122        0.29476       -1.13045
H          3.60861       -0.95901        0.38073
C          4.57785        1.31116        0.54496
C          5.90398       -0.34190       -0.67608
H          6.48896        0.43648       -1.18667
H          6.44580       -0.64559        0.22405
H          5.81914       -1.21040       -1.33284
H          5.10781        1.08698        1.47484
H          5.06904        2.16756        0.06117
H          3.54862        1.57229        0.80127
