# Supplementary material for: Role of base strength, cluster structure and charge in sulfuric-acid-driven particle formation
Source: Copernicus journal article supplement (doi:10.5194/acp-19-9753-2019), 2019-08-02
Supplement: Supplementary file 1 [file acp-19-9753-2019-supplement.zip › Acid-Base-Ions_xyz/2A4D1P.xyz]

55
2A4D1P.log	Energy: -1218264.1237385
S         -1.37512        0.02748        0.91958
O         -2.65753        0.05915        1.68563
O         -0.53215       -1.14396        1.32499
O         -0.59976        1.29135        1.14197
O         -1.69666       -0.11393       -0.56777
H          0.84431       -0.64639        2.09256
N         -0.00084       -2.16610       -1.40035
H          0.89938       -1.95751       -0.92800
H         -0.63102       -1.36790       -1.15351
O          2.98090        0.86301        0.28847
O          1.90051        0.37467       -1.88218
S          2.82229       -0.08929       -0.83045
O          2.52881       -1.46122       -0.36359
H          2.19634        0.25954        1.81127
N          1.71441       -0.27547        2.55486
H          0.03926        2.07337       -0.11343
N          0.43648        2.54603       -0.97070
H          0.99779        1.80492       -1.43109
C          1.32908        3.65411       -0.56711
C         -0.68520        2.93914       -1.84692
C         -0.56708       -3.41259       -0.83771
C          1.31906        0.62727        3.65929
H          0.13340       -4.23230       -1.00306
H         -0.73178       -3.25243        0.22730
H         -1.51175       -3.63175       -1.33823
H         -1.29540        2.05323       -2.02625
H         -1.28007        3.70231       -1.34241
H         -0.29757        3.33479       -2.78699
H          2.13888        3.23511        0.03010
H          1.73769        4.13492       -1.45728
H          0.75969        4.37749        0.01812
H          0.65761        1.39038        3.24986
H          2.21089        1.07763        4.09777
H          0.78586        0.04848        4.41460
C          0.22733       -2.20418       -2.86234
H          0.68478       -1.26155       -3.16073
H         -0.72725       -2.34933       -3.37036
H          0.89992       -3.02983       -3.09844
C          2.57165       -1.40937        2.96361
H          2.02586       -2.02874        3.67651
H          3.48237       -1.02739        3.42754
H          2.81841       -1.98621        2.07242
N         -4.46481        0.00494       -0.17321
H         -3.67374       -0.08962       -0.82839
H         -3.90451        0.03383        0.73790
C         -5.33399       -1.18861       -0.21683
C         -5.15971        1.29154       -0.38497
H         -5.63237        1.30234       -1.36844
H         -5.91643        1.41857        0.38981
H         -4.42763        2.09576       -0.31018
H         -6.09420       -1.10296        0.56023
H         -5.81300       -1.26513       -1.19431
H         -4.72270       -2.07107       -0.02769
O          4.23304       -0.14242       -1.60454
H          4.93156       -0.41644       -0.99353
