# Supplementary material for: Role of base strength, cluster structure and charge in sulfuric-acid-driven particle formation
Source: Copernicus journal article supplement (doi:10.5194/acp-19-9753-2019), 2019-08-02
Supplement: Supplementary file 1 [file acp-19-9753-2019-supplement.zip › Acid-Base-Ions_xyz/2a4g.xyz]

50
2a4g.log	Energy: -1394216.3753898
C          2.12651       -0.86020        2.14515
N          1.57848       -2.05796        2.36488
N          3.43442       -0.64956        2.41356
N          1.37692        0.13873        1.70998
H          2.11229       -2.77720        2.82165
H          0.35313        0.01844        1.64278
H          1.85107        0.95983        1.34218
H          4.05971       -1.43151        2.29467
H          3.80854        0.23256        2.06856
C          1.66031       -1.53111       -1.74642
N          2.87849       -1.46909       -2.32792
N          1.15268       -2.71009       -1.37563
N          0.94537       -0.42735       -1.59811
H          3.56367       -2.14581       -2.02802
H          1.43132        0.46245       -1.66181
H         -0.03931       -0.49552       -1.29173
H          1.66195       -3.55290       -1.58011
H          0.38377       -2.73691       -0.68503
S          4.17005        1.25319       -0.51133
O          4.84831       -0.03364       -0.37121
O          3.54450        1.75100        0.73779
O          5.38002        2.28966       -0.83688
H          4.99692        3.16905       -0.95664
O          3.25040        1.33853       -1.67091
H          3.25813       -0.52915       -2.42696
C         -3.11832        2.84094        0.42893
N         -4.22704        2.98880       -0.24395
N         -2.78119        3.58297        1.53265
N         -2.17806        1.93361        0.04586
H         -4.74545        3.80903        0.05630
H         -2.40515        1.38815       -0.77430
H         -1.76874        1.32945        0.76337
H         -3.51227        4.01384        2.07254
H         -1.92351        3.37251        2.01720
C         -4.74742       -0.24482       -1.00902
N         -4.54128       -1.50173       -1.44270
N         -4.84782       -0.02482        0.30213
N         -4.92496        0.77303       -1.85585
H         -4.11210       -2.10100       -0.73226
H         -4.84386        0.61405       -2.84625
H         -4.78882        1.72843       -1.46762
H         -4.33903       -0.68502        0.89966
H         -4.91446        0.94441        0.58836
S         -1.68139       -1.45955        0.62999
O         -3.02836       -2.02863        0.92937
O         -1.35103       -0.34590        1.59370
O         -0.61506       -2.52312        0.74427
H          0.67022       -2.28772        1.92979
O         -1.66246       -0.90736       -0.77451
H         -4.09582       -1.58679       -2.34407
