# Supplementary material for: Role of base strength, cluster structure and charge in sulfuric-acid-driven particle formation
Source: Copernicus journal article supplement (doi:10.5194/acp-19-9753-2019), 2019-08-02
Supplement: Supplementary file 1 [file acp-19-9753-2019-supplement.zip › Acid-Base-Ions_xyz/2a4n.xyz]

30
2a4n.log	Energy: -1020712.3904544
S         -1.82881        0.27618       -0.58083
O         -1.25930        0.54995        0.78221
O         -3.19816       -0.21983       -0.55115
O         -0.98492       -0.98579       -1.12793
O         -1.55021        1.41098       -1.48106
H         -0.03483       -0.72994       -1.26443
N         -0.51395       -1.87234        1.78196
H          0.44166       -1.95106        1.38340
H         -0.49201       -2.06124        2.77917
H         -1.21221       -2.49839        1.28481
H         -0.82417       -0.89066        1.59022
N         -2.53164       -3.13430        0.28411
H         -3.20431       -3.83120        0.58618
H         -2.11155       -3.46135       -0.58129
H         -3.04111       -2.28251        0.03577
N          0.66330        2.71656       -0.42293
H          1.15925        3.38928       -0.99920
H          1.33448        2.03274       -0.01837
H          0.12925        3.17990        0.35988
H         -0.05110        2.20692       -0.98616
S          2.37496       -0.41083       -0.04440
O          1.58312       -0.29704       -1.29123
O          2.05031       -1.62576        0.72683
O          2.40764        0.83542        0.73025
O          3.91800       -0.58827       -0.50925
H          4.00273       -1.43913       -0.96057
N         -1.10649        3.40802        1.63815
H         -1.39737        2.42796        1.59324
H         -0.83451        3.62002        2.59209
H         -1.91316        3.98014        1.41040
