# Supplementary material for: Role of base strength, cluster structure and charge in sulfuric-acid-driven particle formation
Source: Copernicus journal article supplement (doi:10.5194/acp-19-9753-2019), 2019-08-02
Supplement: Supplementary file 1 [file acp-19-9753-2019-supplement.zip › Acid-Base-Ions_xyz/2a4n1p.xyz]

31
2a4n1p.log	Energy: -1020962.1934524
S          1.78473        0.21751       -0.21260
O          0.88697        0.85153       -1.22051
N         -0.25791       -1.59324       -2.13265
H          0.64516       -1.74706       -1.63772
H         -1.01059       -1.74617       -1.43380
O          1.78940       -1.26051       -0.33902
O          1.41559        0.64699        1.16619
N         -0.69091        2.71728       -0.11420
H         -0.16632        3.41768        0.40491
H         -0.02831        2.05769       -0.61042
N         -0.29043       -1.02480        2.39628
H          0.12242       -1.72653        3.00534
H          0.44749       -0.39129        1.97523
S         -2.55153       -0.12327        0.04820
O         -4.08539       -0.54990        0.24586
O         -2.41308        0.54253       -1.24723
O         -1.85860       -1.43743        0.12668
O         -2.18865        0.75164        1.19121
H         -4.66652        0.21045        0.09808
O          3.20194        0.76342       -0.53239
H          3.98139        0.23290       -0.05464
H         -1.26421        2.12924        0.52545
H         -1.30540        3.15934       -0.79509
H         -0.27192       -0.59494       -2.36925
H         -0.36970       -2.17847       -2.95618
H         -0.80693       -1.45684        1.60578
H         -0.96349       -0.44735        2.90096
N          5.17415       -0.50400        0.54015
H          5.03052       -1.50897        0.48905
H          5.34679       -0.26294        1.51208
H          6.01865       -0.28732        0.01720
