# Supplementary material for: Role of base strength, cluster structure and charge in sulfuric-acid-driven particle formation
Source: Copernicus journal article supplement (doi:10.5194/acp-19-9753-2019), 2019-08-02
Supplement: Supplementary file 1 [file acp-19-9753-2019-supplement.zip › Acid-Base-Ions_xyz/2a5g1p.xyz]

60
2a5g1p.log	Energy: -1523366.3628007
C         -6.07525       -1.30358        0.24349
N         -5.25629       -2.00352       -0.53190
N         -7.35758       -1.69091        0.39350
N         -5.63366       -0.21763        0.86558
H         -5.62027       -2.72251       -1.13509
H         -4.23082       -1.83998       -0.50611
H         -4.69997        0.17275        0.63410
H         -6.17656        0.20389        1.60104
H         -8.03628       -1.08586        0.82461
H         -7.66900       -2.59499        0.08038
C          1.54908        0.30394        2.27889
N          1.23244       -0.95254        1.96536
N          2.83628        0.64868        2.40393
N          0.57122        1.17737        2.53547
H          1.97138       -1.54712        1.60459
H         -0.37373        0.90032        2.26048
H          0.78843        2.15794        2.62164
H          3.51557       -0.01545        2.03607
H          3.08464        1.62511        2.31867
C          0.76257       -3.04352       -0.76080
N          1.80835       -3.87895       -0.72716
N         -0.38278       -3.36196       -0.15055
N          0.87186       -1.89156       -1.41486
H          1.75436       -4.75216       -0.23130
H          1.77139       -1.67025       -1.82797
H          0.16398       -1.15561       -1.30632
H         -0.45409       -4.21898        0.37157
H         -1.22244       -2.77031       -0.24171
S          4.26665       -1.11092       -0.47549
O          3.90157       -1.56160        0.88787
O          3.91371        0.28773       -0.74882
O          5.87817       -1.08001       -0.53454
H          6.22100       -1.97818       -0.42596
O          3.81503       -2.06155       -1.51255
H          2.72205       -3.51451       -0.99916
C          1.92426        2.94015        0.08759
N          1.07750        3.88177        0.42756
N          3.27819        2.99036        0.35810
N          1.49888        1.81234       -0.51578
H          1.54435        4.65078        0.89891
H          0.51872        1.54705       -0.50947
H          2.17859        1.08782       -0.72271
H          3.69321        3.90916        0.39684
H          3.85819        2.28004       -0.08024
C         -1.69914        3.30290       -1.27625
N         -2.66641        2.69665       -1.97797
N         -1.69002        3.21516        0.05102
N         -0.77287        4.06407       -1.87213
H         -3.11575        1.90806       -1.50923
H         -0.65202        4.02569       -2.87043
H          0.02519        4.33010       -1.29062
H         -2.29425        2.51232        0.46565
H         -0.81352        3.49992        0.50785
S         -2.05333       -0.24905        0.10994
O         -3.20869        0.73163        0.02217
O         -1.56496       -0.32019        1.51740
O         -2.55060       -1.60646       -0.32647
H          0.25230       -1.15936        1.78747
O         -0.96045        0.19800       -0.80922
H         -2.58274        2.64903       -2.98035
