# Supplementary material for: Role of base strength, cluster structure and charge in sulfuric-acid-driven particle formation
Source: Copernicus journal article supplement (doi:10.5194/acp-19-9753-2019), 2019-08-02
Supplement: Supplementary file 1 [file acp-19-9753-2019-supplement.zip › Acid-Base-Ions_xyz/2a5n1p.xyz]

35
2a5n1p.log	Energy: -1056465.3414147
N         -0.09003        0.40949        2.53520
H         -0.05866       -0.58180        2.27399
H          0.10035        0.54748        3.52352
H          0.59981        0.90265        1.92049
N         -0.25871        2.08914       -1.61000
H          0.28685        2.07743       -0.71903
H         -0.96438        1.30763       -1.54862
H         -0.70563        2.98705       -1.77410
H          0.40995        1.86393       -2.34732
N          0.37204       -2.22086       -1.35742
H         -0.25196       -2.00167       -0.53638
H         -0.20509       -2.44824       -2.16403
H          0.93775       -1.35517       -1.53968
H          0.99353       -2.99352       -1.13145
N         -5.60124        0.49784        0.04683
H         -6.38990        0.07941        0.53241
H         -5.91256        0.74476       -0.88815
H         -5.35878        1.35681        0.53318
H         -4.38280       -0.44421        0.05649
N          5.48149       -0.75111        0.45092
H          6.18973       -0.32877        1.04479
H          5.95580       -1.16734       -0.34522
H          5.03504       -1.49718        0.97798
H          4.40464        0.24513        0.06666
S         -2.19509       -0.38821        0.08780
O         -1.22524       -1.37302        0.64728
O         -1.86246       -0.07360       -1.33034
O         -3.57260       -1.11018        0.11842
O         -2.27843        0.83924        0.91670
H         -1.03264        0.73871        2.25042
S          2.22042        0.37839       -0.09556
O          3.65885        0.96368       -0.15024
O          1.37559        1.46755        0.50521
O          1.76707        0.12519       -1.49563
O          2.21458       -0.84480        0.72352
