# Supplementary material for: Role of base strength, cluster structure and charge in sulfuric-acid-driven particle formation
Source: Copernicus journal article supplement (doi:10.5194/acp-19-9753-2019), 2019-08-02
Supplement: Supplementary file 1 [file acp-19-9753-2019-supplement.zip › Acid-Base-Ions_xyz/2D.xyz]

20
2D.log	Energy: -169602.1127889
N         -1.47475       -0.40799        0.24453
H         -0.53820       -0.50685       -0.14854
H          1.96552       -0.85902       -1.27055
N          1.55212       -0.34326       -0.50196
C          2.03677       -0.87015        0.76567
C          1.81101        1.07967       -0.66310
C         -1.55391        0.83491        0.98620
C         -2.46517       -0.48913       -0.81142
H         -2.32348       -1.41252       -1.38014
H         -2.43233        0.36145       -1.51897
H         -3.47173       -0.51688       -0.37724
H         -2.50842        0.89066        1.52305
H         -1.47714        1.73948        0.35213
H         -0.75377        0.87255        1.73231
H          1.24519        1.63506        0.09253
H          2.87526        1.34959       -0.55436
H          1.46482        1.40892       -1.64625
H          3.10988       -0.68212        0.93901
H          1.47632       -0.40692        1.58467
H          1.85425       -1.94646        0.81039
