# Supplementary material for: Role of base strength, cluster structure and charge in sulfuric-acid-driven particle formation
Source: Copernicus journal article supplement (doi:10.5194/acp-19-9753-2019), 2019-08-02
Supplement: Supplementary file 1 [file acp-19-9753-2019-supplement.zip › Acid-Base-Ions_xyz/2D1P.xyz]

21
2D1P.log	Energy: -169856.8517049
N         -1.28581        0.00001        0.39479
H         -1.36068        0.00004        1.40968
C         -1.92763        1.22387       -0.11625
C         -1.92762       -1.22388       -0.11619
H         -1.79122        1.27636       -1.20025
H         -3.00245        1.24432        0.09425
H         -1.46337        2.10108        0.33962
H         -1.79120       -1.27643       -1.20019
H         -3.00243       -1.24434        0.09431
H         -1.46335       -2.10106        0.33972
N          1.28304        0.00001       -0.38120
H          1.30261        0.00003       -1.40121
H          0.20801        0.00001       -0.05962
C          1.92283        1.24332        0.11812
C          1.92281       -1.24334        0.11806
H          2.97650       -1.26407       -0.16374
H          1.40873       -2.10501       -0.30841
H          1.83526       -1.26650        1.20512
H          2.97652        1.26405       -0.16368
H          1.40877        2.10502       -0.30831
H          1.83528        1.26644        1.20518
