# Supplementary material for: Role of base strength, cluster structure and charge in sulfuric-acid-driven particle formation
Source: Copernicus journal article supplement (doi:10.5194/acp-19-9753-2019), 2019-08-02
Supplement: Supplementary file 1 [file acp-19-9753-2019-supplement.zip › Acid-Base-Ions_xyz/2g.xyz]

18
2g.log	Energy: -257705.0910775
C          2.10943        0.05918       -0.01117
N          1.43363        1.15080       -0.15349
N          3.47883       -0.00725        0.24789
N          1.50682       -1.16223       -0.09837
H          2.03594        1.96814       -0.18011
H          0.47664       -1.16662       -0.15073
H          1.90925       -1.89927        0.45991
H          3.97938        0.86222        0.14344
H          3.95866       -0.78773       -0.17775
C         -2.10943       -0.05918       -0.01117
N         -1.43363       -1.15080       -0.15350
N         -3.47883        0.00724        0.24789
N         -1.50682        1.16223       -0.09836
H         -2.03594       -1.96813       -0.18013
H         -0.47664        1.16663       -0.15072
H         -1.90925        1.89927        0.45992
H         -3.97938       -0.86222        0.14343
H         -3.95866        0.78773       -0.17774
