# Supplementary material for: Role of base strength, cluster structure and charge in sulfuric-acid-driven particle formation
Source: Copernicus journal article supplement (doi:10.5194/acp-19-9753-2019), 2019-08-02
Supplement: Supplementary file 1 [file acp-19-9753-2019-supplement.zip › Acid-Base-Ions_xyz/2g1p.xyz]

19
2g1p.log	Energy: -257968.8310621
C          2.15018       -0.00406        0.00575
N          2.06019        1.12898       -0.74530
N          1.05797       -0.58336        0.43143
N          3.41292       -0.44307        0.25350
H          2.82578        1.40500       -1.33889
H          1.14190        1.40807       -1.04902
H          3.55181       -1.22288        0.87466
H          4.20343        0.16826        0.12500
H          1.26834       -1.36392        1.04670
C         -2.18016       -0.03118        0.02023
N         -1.50413        0.59428        0.98160
H         -0.49868        0.38147        1.05464
H         -1.96513        1.16763        1.66846
N         -3.50465        0.12939       -0.10616
H         -4.02376        0.71962        0.52331
H         -4.01975       -0.32574       -0.84210
N         -1.50049       -0.80524       -0.82283
H         -0.49357       -0.92617       -0.63021
H         -1.96314       -1.34673       -1.53412
