# Supplementary material for: Role of base strength, cluster structure and charge in sulfuric-acid-driven particle formation
Source: Copernicus journal article supplement (doi:10.5194/acp-19-9753-2019), 2019-08-02
Supplement: Supplementary file 1 [file acp-19-9753-2019-supplement.zip › Acid-Base-Ions_xyz/2n.xyz]

8
2n.log	Energy:  -70970.8685441
N          1.56175        0.00698       -0.07282
N         -1.55627        0.00691        0.07034
H         -2.24000        0.74684       -0.04158
H         -0.87300        0.08304       -0.67834
H         -2.03789       -0.87953       -0.03026
H          0.83624        0.07818        0.63594
H          2.04255       -0.87657        0.05381
H          2.23373        0.75080        0.07775
