# Supplementary material for: Role of base strength, cluster structure and charge in sulfuric-acid-driven particle formation
Source: Copernicus journal article supplement (doi:10.5194/acp-19-9753-2019), 2019-08-02
Supplement: Supplementary file 1 [file acp-19-9753-2019-supplement.zip › Acid-Base-Ions_xyz/2n1p.xyz]

9
2n1p.log	Energy:  -71212.2090467
N          1.34454       -0.00013       -0.00016
H          1.73158        0.27229        0.90210
H          1.73445       -0.91660       -0.21498
H          1.73315        0.64568       -0.68564
N         -1.33401       -0.00003       -0.00010
H         -1.69138        0.88079        0.37167
H         -0.19645       -0.00042       -0.00118
H         -1.69142       -0.76169        0.57781
H         -1.69369       -0.11897       -0.94790
