# Supplementary material for: Role of base strength, cluster structure and charge in sulfuric-acid-driven particle formation
Source: Copernicus journal article supplement (doi:10.5194/acp-19-9753-2019), 2019-08-02
Supplement: Supplementary file 1 [file acp-19-9753-2019-supplement.zip › Acid-Base-Ions_xyz/3A.xyz]

21
3A.log	Energy: -1318044.2625745
S          0.20078        1.35309       -0.06328
O         -0.08173        0.06452       -0.72797
O          1.37435        2.05116       -0.53781
H          3.04962        1.23375       -0.55957
O          0.27609        1.10099        1.48365
O         -1.02055        2.29239       -0.16566
O          3.77311        0.57121       -0.52572
S          3.25774       -0.79081        0.09672
O          4.38642       -1.65110        0.24128
O          2.32742       -1.39718       -1.03937
O         -2.46652       -1.15582       -1.11993
H          1.43911       -0.98096       -1.01848
H         -1.56971       -0.74601       -1.03357
O          2.40438       -0.47716        1.24383
O         -3.18676        0.86488        0.10945
H          1.05480        0.50318        1.63985
H         -1.88147        1.79439       -0.03074
O         -4.75982       -1.04769       -0.33033
S         -3.44583       -0.55905       -0.04053
O         -2.90855       -1.18656        1.32958
H         -3.23824       -2.09307        1.42787
