# Supplementary material for: Role of base strength, cluster structure and charge in sulfuric-acid-driven particle formation
Source: Copernicus journal article supplement (doi:10.5194/acp-19-9753-2019), 2019-08-02
Supplement: Supplementary file 1 [file acp-19-9753-2019-supplement.zip › Acid-Base-Ions_xyz/3A1D.xyz]

31
3A1D.log	Energy: -1402891.6792028
S         -1.08676        1.74813       -0.88947
O         -1.79199        1.48381        0.39105
O          0.36000        1.95104       -0.68006
O         -1.70151        3.16475       -1.32631
O         -1.40738        0.79650       -1.96188
H         -0.49056        1.04192        1.61811
H         -1.40183        3.37810       -2.22218
S         -1.77951       -1.89157        0.07759
O         -2.85501       -0.93116        0.71825
O         -0.46132       -1.31573        0.40272
O         -1.99392       -1.75811       -1.47246
O         -2.08454       -3.23294        0.46606
H         -2.58521        0.01922        0.58931
H         -1.75059       -0.83961       -1.77131
N          0.35882        0.91846        2.19260
H          1.06150        0.47908        1.56547
C          0.08465        0.00611        3.32540
H         -0.67560        0.44976        3.96954
H          1.00781       -0.14708        3.88510
H         -0.26637       -0.94316        2.92314
C          0.86858        2.25329        2.58292
H          0.13434        2.74583        3.22157
H          1.02781        2.83203        1.67371
H          1.81150        2.12821        3.11584
S          2.82508       -0.60163       -0.51174
O          4.16916       -0.97792       -0.82512
O          2.34476        0.43588       -1.59672
O          2.50601       -0.05575        0.81207
H          1.57690        0.98104       -1.27806
O          1.91076       -1.86683       -0.74862
H          1.01815       -1.73805       -0.34220
