# Supplementary material for: Role of base strength, cluster structure and charge in sulfuric-acid-driven particle formation
Source: Copernicus journal article supplement (doi:10.5194/acp-19-9753-2019), 2019-08-02
Supplement: Supplementary file 1 [file acp-19-9753-2019-supplement.zip › Acid-Base-Ions_xyz/3a1g.xyz]

30
3a1g.log	Energy: -1446948.0444051
C          0.11607        2.36851        0.74418
N         -0.99927        2.42740        1.47938
N          1.31423        2.60224        1.29966
N          0.02767        2.15884       -0.56470
H         -0.93630        2.43699        2.48374
H         -0.87273        1.89096       -0.94775
H          0.87471        1.91716       -1.06724
H          1.40384        2.50332        2.29831
H          2.12424        2.32076        0.75474
S         -0.03374       -1.17651        1.17087
O          1.10280       -0.44261        1.73070
O         -0.06828       -1.11924       -0.32478
O          0.29898       -2.70226        1.54953
H         -0.40991       -3.28524        1.24084
O         -1.33693       -0.84122        1.75744
H         -1.85731        2.07509        1.06574
S          3.35177       -0.09589       -0.90197
O          4.60881       -0.23128       -1.56905
O          2.70885        1.21817       -0.81206
O          2.33514       -1.09675       -1.58386
H          1.43972       -1.07424       -1.15823
O          3.51952       -0.65655        0.56714
H          2.66871       -0.58806        1.07309
S         -3.40236       -0.00292       -0.86754
O         -2.68650        1.23099       -0.52923
O         -4.62298        0.05281       -1.60891
O         -2.40128       -0.94395       -1.65114
H         -1.52058       -0.99415       -1.19564
O         -3.68310       -0.78265        0.47843
H         -2.86018       -0.81155        1.03164
