# Supplementary material for: Role of base strength, cluster structure and charge in sulfuric-acid-driven particle formation
Source: Copernicus journal article supplement (doi:10.5194/acp-19-9753-2019), 2019-08-02
Supplement: Supplementary file 1 [file acp-19-9753-2019-supplement.zip › Acid-Base-Ions_xyz/3a1n.xyz]

25
3a1n.log	Energy: -1353561.2815457
N         -0.09291        0.45066        2.54209
H          0.23333        1.38807        2.23708
H          0.62783       -0.22936        2.25272
H         -0.96715        0.19743        2.03411
S          1.72989       -1.75599       -0.06255
O          2.46971       -0.88372       -1.10364
O          1.82746       -1.18275        1.26682
H         -0.24131        0.41722        3.54684
O          0.42731       -2.17123       -0.55521
S          1.03069        2.07595       -0.18142
O          2.36415        1.58161       -0.59375
O          0.64247        3.26807       -1.18951
O         -0.01767        1.06799       -0.42476
O          1.00724        2.63759        1.17678
H          2.42812        0.13168       -0.90024
H          1.18201        4.04602       -0.98783
S         -2.90815       -0.44124       -0.10506
O         -2.14159       -1.42203       -1.08003
O         -2.62479        0.98908       -0.70350
O         -4.31046       -0.69281       -0.23420
O         -2.27213       -0.53208        1.21280
H         -1.19929       -1.55039       -0.82344
H         -1.65010        1.18257       -0.66240
O          2.65293       -3.05399       -0.03940
H          2.40091       -3.64325       -0.76612
