# Supplementary material for: Role of base strength, cluster structure and charge in sulfuric-acid-driven particle formation
Source: Copernicus journal article supplement (doi:10.5194/acp-19-9753-2019), 2019-08-02
Supplement: Supplementary file 1 [file acp-19-9753-2019-supplement.zip › Acid-Base-Ions_xyz/3A2D.xyz]

41
3A2D.log	Energy: -1487726.9238606
N          0.55760        2.38091       -0.08978
C          1.13454        2.99446        1.12915
H          0.87035        1.40029       -0.14466
C          0.91288        3.07330       -1.34913
N         -2.08647       -2.28815       -0.71745
C         -3.42716       -2.84240       -0.43025
C         -1.29395       -3.05254       -1.70337
H         -2.20632       -1.30997       -1.05009
S         -2.96984        1.06905       -0.28636
O         -2.20269        2.32225       -0.16500
O         -2.88438        0.23148        0.93683
O         -2.73749        0.30239       -1.51610
H         -1.45296        0.27594        1.80181
S          0.27703       -0.91716        1.42510
O         -0.51596        0.26597        2.14216
O          1.58479       -0.92041        2.08191
O         -0.52230       -2.14509        1.56066
O          0.35758       -0.50648       -0.02179
H         -0.47812        2.34090       -0.01647
H         -1.54539       -2.23007        0.17216
O         -4.51892        1.51064       -0.42008
H         -4.72790        2.12498        0.29731
S          3.66450       -0.21752       -0.63508
O          3.91265       -0.93612        0.74825
O          2.56014       -1.12047       -1.33371
O          4.87069       -0.32696       -1.40179
O          3.06143        1.08772       -0.38261
H          3.09211       -0.90881        1.30993
H          1.68117       -0.93907       -0.89746
H         -1.14240       -4.06724       -1.33326
H         -0.33073       -2.55833       -1.82550
H         -1.82624       -3.07519       -2.65521
H         -3.90903       -2.19289        0.30041
H         -3.32040       -3.84996       -0.02621
H         -4.01123       -2.86469       -1.35116
H          1.99466        3.04007       -1.47264
H          0.55528        4.10239       -1.29764
H          0.42477        2.55693       -2.17559
H          0.81239        2.40773        1.98910
H          0.77215        4.02003        1.21219
H          2.22071        2.97135        1.04674
