# Supplementary material for: Role of base strength, cluster structure and charge in sulfuric-acid-driven particle formation
Source: Copernicus journal article supplement (doi:10.5194/acp-19-9753-2019), 2019-08-02
Supplement: Supplementary file 1 [file acp-19-9753-2019-supplement.zip › Acid-Base-Ions_xyz/3a2g.xyz]

39
3a2g.log	Energy: -1575844.9916033
C         -0.18673        2.50508       -0.96904
N         -1.38488        2.86764       -0.48464
N         -0.11483        1.75705       -2.06895
N          0.93227        2.96292       -0.40046
H         -2.18285        2.35406       -0.84520
H          0.86813        3.36189        0.52460
H          1.79410        2.47167       -0.62490
H         -0.95313        1.26175       -2.35780
H          0.79175        1.36731       -2.30757
S          3.00950       -0.39357       -1.09220
O          2.34992       -1.45773       -1.85621
O          2.65490        0.96706       -1.53187
O          2.91649       -0.58552        0.37928
H         -1.42752        3.11150        0.49644
O          4.59846       -0.55611       -1.33030
H          4.77077       -0.53490       -2.28213
C         -0.04706       -2.57787        0.70239
N         -1.23884       -2.66551        1.31346
N          0.01618       -2.61891       -0.62324
N          1.07271       -2.53803        1.43796
H         -2.06230       -2.54333        0.73447
H          0.96913       -2.28353        2.41103
H          1.90708       -2.15715        0.99695
H         -0.84488       -2.45528       -1.13668
H          0.89392       -2.39765       -1.09307
S         -3.13964       -0.38351       -0.87432
O         -2.69352       -1.74336       -1.18037
O         -2.83297        0.64886       -1.88102
O         -4.74432       -0.52818       -0.82942
H         -5.13988        0.35017       -0.74391
O         -2.74230        0.06228        0.49343
H         -1.30852       -2.32989        2.26317
S          0.23226        0.83778        2.21760
O          0.05608       -0.22098        3.19732
O         -0.37507        2.13245        2.46455
O          1.74934        1.09926        1.93006
H          2.19420        0.40837        1.33898
O         -0.21808        0.29681        0.80143
H         -1.23109        0.20560        0.73423
