# Supplementary material for: Role of base strength, cluster structure and charge in sulfuric-acid-driven particle formation
Source: Copernicus journal article supplement (doi:10.5194/acp-19-9753-2019), 2019-08-02
Supplement: Supplementary file 1 [file acp-19-9753-2019-supplement.zip › Acid-Base-Ions_xyz/3a2n.xyz]

29
3a2n.log	Energy: -1389075.0045235
N          0.03407       -2.04371        0.22467
H         -0.81926       -2.21404       -0.33984
H          0.91387       -2.09619       -0.31490
H          0.06075       -2.69064        1.00859
N         -2.40736        1.95434        1.74356
H         -3.30281        2.41258        1.59032
H         -2.05137        2.18348        2.66825
H         -2.53803        0.91594        1.65084
S         -3.15456       -0.85893       -0.13556
O         -2.54802       -2.02942       -0.78649
O         -2.94281        0.40506       -0.87725
O         -2.81508       -0.72061        1.29561
H         -1.34698        0.65555       -1.42971
S          0.30346        1.57354       -0.41154
O         -0.36453        0.70849       -1.56883
O          1.61884        1.94495       -0.92082
O         -0.60667        2.69467       -0.11505
O          0.38716        0.65521        0.78229
H         -0.00709       -1.06543        0.57316
H         -1.71817        2.27856        1.00855
O         -4.74766       -1.11098       -0.11036
H         -5.04565       -1.32417       -1.00627
S          3.54715       -0.73259        0.12843
O          3.91034        0.61489       -0.59702
O          2.80902       -0.26516        1.45816
O          4.76728       -1.37240        0.51751
O          2.57097       -1.45220       -0.68993
H          3.08538        1.11493       -0.84021
H          1.93476        0.16270        1.24964
