# Supplementary material for: Role of base strength, cluster structure and charge in sulfuric-acid-driven particle formation
Source: Copernicus journal article supplement (doi:10.5194/acp-19-9753-2019), 2019-08-02
Supplement: Supplementary file 1 [file acp-19-9753-2019-supplement.zip › Acid-Base-Ions_xyz/3a2n1p.xyz]

30
3a2n1p.log	Energy: -1389298.9649560
S         -2.35508       -1.14313       -0.03440
O         -2.43952        0.24496       -0.43765
N         -2.38915        3.01178       -0.98603
H         -3.24992        3.51117       -0.76557
H         -2.50651        1.99690       -0.81976
N          0.39196       -1.18710        2.82649
H          0.56969       -0.18714        2.94243
H          1.06515       -1.55054        2.11230
S          2.12746       -1.23468       -0.47054
O          2.82390       -2.15979       -1.56410
O          0.84732       -0.87151       -1.17088
O          2.97458       -0.05945       -0.25316
O          1.89691       -2.05935        0.72171
H          3.67182       -2.49445       -1.23316
O         -1.45585       -1.95989       -1.00489
H         -0.50126       -1.60711       -1.05407
H         -2.14010        3.16071       -1.96402
H         -1.60293        3.34373       -0.38737
H          0.47771       -1.68712        3.70870
H         -0.55420       -1.29224        2.42535
O         -2.01427       -1.43843        1.34797
S          0.63789        2.14607        0.34215
O          0.25384        1.65951       -1.11025
O          2.16789        2.44789        0.28031
O         -0.05664        3.40789        0.50720
O          0.38171        1.06817        1.28189
H          0.49413        0.69066       -1.23722
H          2.65290        1.59052        0.13722
O         -3.76846       -1.76452       -0.36498
H         -3.85172       -2.66375       -0.00903
