# Supplementary material for: Role of base strength, cluster structure and charge in sulfuric-acid-driven particle formation
Source: Copernicus journal article supplement (doi:10.5194/acp-19-9753-2019), 2019-08-02
Supplement: Supplementary file 1 [file acp-19-9753-2019-supplement.zip › Acid-Base-Ions_xyz/3A3D.xyz]

51
3A3D.log	Energy: -1572560.6556557
S         -2.16114        0.30281        1.44989
O         -1.20842        1.39376        1.77217
O         -3.44061        0.36659        2.12694
O         -2.28151        0.18837       -0.05213
O         -1.50425       -1.07678        1.91612
H          3.54494        0.47509       -0.01123
N         -1.69497        2.79661       -0.93006
H         -1.74473        1.79486       -0.65084
H         -0.74920        3.13166       -0.64434
O          0.71619        1.18716       -1.18278
O          0.94866        3.44908       -0.34701
S          1.51605        2.08811       -0.30642
O          2.96613        1.99895       -0.53945
O          1.36907        1.53741        1.18402
H          0.40655        1.44733        1.43001
H         -2.29131       -1.46124       -0.53460
H          3.33483       -1.18954       -0.09730
N          3.93591       -0.43890        0.31209
C          5.30602       -0.57898       -0.22137
C          3.84080       -0.50602        1.78861
C         -2.73847        3.54198       -0.19422
C         -1.78920        2.87894       -2.40162
H         -0.96363        2.30358       -2.82018
H         -1.71090        3.92239       -2.71004
H         -2.74607        2.46464       -2.72343
H         -2.55587        3.41516        0.87277
H         -3.71704        3.13303       -0.44953
H         -2.68598        4.59715       -0.46651
H          2.78943       -0.42062        2.05734
H          4.23982       -1.46384        2.12591
H          4.41057        0.31853        2.21911
H          5.92965        0.22392        0.17421
H          5.71001       -1.54830        0.07404
H          5.26654       -0.51210       -1.30847
S          0.96700       -2.26516       -0.35467
O          2.37462       -2.45288       -0.75252
O          0.87599       -1.50228        0.91850
O          0.14516       -3.48623       -0.38292
H         -0.57325       -1.18910        1.56058
O          0.25744       -1.34777       -1.46180
H          0.49347       -0.38470       -1.31958
N         -2.41649       -2.47969       -0.73988
C         -2.66751       -2.64517       -2.18617
C         -3.48165       -3.00617        0.14103
H         -1.50538       -2.93599       -0.51542
H         -3.57744       -2.10674       -2.45617
H         -1.81028       -2.23970       -2.72317
H         -2.78007       -3.70615       -2.41383
H         -4.41330       -2.48070       -0.07319
H         -3.60076       -4.07588       -0.03744
H         -3.19005       -2.82148        1.17471
