# Supplementary material for: Role of base strength, cluster structure and charge in sulfuric-acid-driven particle formation
Source: Copernicus journal article supplement (doi:10.5194/acp-19-9753-2019), 2019-08-02
Supplement: Supplementary file 1 [file acp-19-9753-2019-supplement.zip › Acid-Base-Ions_xyz/3A3D1P.xyz]

52
3A3D1P.log	Energy: -1572794.8499707
S         -0.39008       -1.10621        0.98541
O         -0.11614        0.29081        1.37142
O         -1.51019       -1.66918        1.95759
O         -0.94711       -1.19312       -0.40769
H         -2.28425       -1.06452        1.91975
S          2.70020        1.04094       -0.93752
O          2.69489        1.77841        0.34205
O          1.52222        1.34450       -1.77786
O          2.95313       -0.40165       -0.76759
O          3.99753        1.51913       -1.76138
H          3.96258        2.47476       -1.91115
O          0.75777       -2.00103        1.16009
N          1.17502       -2.08229       -2.02996
H          1.91448       -1.53622       -1.54076
H          0.29879       -1.78273       -1.56734
C          1.16027       -1.67882       -3.45622
C          1.37410       -3.53151       -1.79097
H          0.33062       -2.17292       -3.96306
H          1.04795       -0.59531       -3.50286
H          2.10404       -1.97163       -3.91738
H          0.58015       -4.08911       -2.28900
H          2.34375       -3.82894       -2.19137
H          1.33583       -3.70638       -0.71593
C          2.28255        0.00724        3.62162
H          2.91491        0.77806        4.06331
H          1.25685        0.36298        3.52975
H          2.31222       -0.89425        4.23426
N          2.78506       -0.31243        2.26399
C          4.17838       -0.81838        2.22563
H          4.23953       -1.73970        2.80574
H          4.44292       -1.00330        1.18511
H          4.84178       -0.06566        2.65252
H          2.71643        0.52666        1.65756
H          2.15088       -1.00529        1.82702
N         -0.55770        2.47106       -0.26878
H          0.18618        2.17115       -0.92872
H         -0.65394        1.65463        0.36342
C         -0.06582        3.61933        0.53118
C         -1.82012        2.73263       -0.99974
H         -0.80702        3.86523        1.29211
H          0.87926        3.33089        0.99017
H          0.08636        4.47391       -0.12907
H         -2.61356        2.95034       -0.28428
H         -1.67564        3.58475       -1.66463
H         -2.08352        1.85047       -1.58244
S         -4.16659        0.09722       -0.00183
O         -3.31754        0.26011        1.16867
O         -3.26892       -0.38525       -1.19988
O         -4.98839        1.17606       -0.47572
H         -2.39690       -0.76523       -0.86415
O         -5.07036       -1.17429        0.32675
H         -5.85528       -1.18707       -0.24285
