# Supplementary material for: Role of base strength, cluster structure and charge in sulfuric-acid-driven particle formation
Source: Copernicus journal article supplement (doi:10.5194/acp-19-9753-2019), 2019-08-02
Supplement: Supplementary file 1 [file acp-19-9753-2019-supplement.zip › Acid-Base-Ions_xyz/3a3g.xyz]

48
3a3g.log	Energy: -1704734.9967836
C          0.79082        0.00230       -1.78622
N          1.43305        1.15264       -1.60048
N         -0.49656        0.02171       -2.16519
N          1.40390       -1.16542       -1.60970
H          0.89947        2.01131       -1.66878
H          2.37082       -1.21529       -1.27677
H          0.85544       -2.01260       -1.69799
H         -0.95264        0.91513       -2.30156
H         -0.98126       -0.85758       -2.29619
S          4.45471       -0.02694        0.21844
O          4.13733       -0.08672        1.66695
O          4.02979       -1.25044       -0.48911
O          4.02922        1.22062       -0.42622
H          2.39782        1.17850       -1.25965
O          6.06916        0.03465        0.11537
H          6.42988       -0.75857        0.53423
C          0.87421        0.00513        1.68024
N         -0.42997        0.04174        1.38400
N          1.48606       -1.16943        1.84277
N          1.53885        1.14604        1.87877
H         -0.85301       -0.82679        1.06782
H          1.10066        2.00649        1.57640
H          2.55376        1.09819        1.93948
H          1.00406       -2.00280        1.52945
H          2.50314       -1.16722        1.89606
S         -1.64121       -3.15992       -0.47975
O         -1.03862       -2.82101       -1.78100
O         -3.07947       -2.80813       -0.41062
O         -1.55474       -4.76769       -0.33989
H         -1.93939       -5.16723       -1.13271
O         -0.88629       -2.69322        0.69296
H         -0.81068        0.94056        1.09762
C         -3.64573       -0.01858        1.19853
N         -3.69681       -1.18484        1.85225
N         -3.64122        1.14452        1.85747
N         -3.63928       -0.01635       -0.13126
H         -3.53533       -1.21530        2.84481
H         -3.56892       -0.90755       -0.61557
H         -3.52720        0.87160       -0.61293
H         -3.50431        1.16488        2.85376
H         -3.47116        1.99462        1.31908
S         -1.59012        3.20498       -0.47115
O         -0.78409        2.80265        0.70117
O         -0.93288        2.90099       -1.75461
O         -2.98982        2.74991       -0.37873
H         -3.54861       -2.03573        1.30946
O         -1.73999        4.81262       -0.40291
H         -0.89529        5.21419       -0.64916
