# Supplementary material for: Role of base strength, cluster structure and charge in sulfuric-acid-driven particle formation
Source: Copernicus journal article supplement (doi:10.5194/acp-19-9753-2019), 2019-08-02
Supplement: Supplementary file 1 [file acp-19-9753-2019-supplement.zip › Acid-Base-Ions_xyz/3a3g1p.xyz]

49
3a3g1p.log	Energy: -1704968.8300421
C         -3.91985        1.53664       -0.18644
N         -4.42035        2.76359        0.00790
N         -4.73257        0.49908       -0.40219
N         -2.60997        1.33986       -0.17009
H         -5.41198        2.93589        0.02256
H         -3.80559        3.54879        0.15428
H         -1.92761        2.06716        0.05777
H         -2.28120        0.38727       -0.30764
H         -4.32680       -0.42272       -0.53255
H         -5.73122        0.60746       -0.46134
C          0.62432       -0.09485        2.81873
N          0.63231       -1.40120        3.10349
N          1.74195        0.62640        2.94269
N         -0.52203        0.49915        2.48686
H          1.51828       -1.88558        3.12336
H         -1.31300       -0.09457        2.26560
H         -0.50599        1.44056        2.10544
H          2.61963        0.12965        3.00935
H          1.78669        1.52768        2.47901
S         -1.84990       -2.36344        0.20801
O         -2.48872       -1.41440       -0.73320
O         -0.48046       -2.73872       -0.21990
O         -1.91779       -1.94467        1.61488
H         -0.19008       -1.94280        2.86456
O         -2.76085       -3.66856        0.03232
H         -2.46753       -4.36634        0.63731
C          0.70992       -0.72155       -2.78326
N         -0.47479       -0.15222       -2.55489
N          1.77607        0.04938       -3.00305
N          0.81249       -2.05411       -2.86975
H         -0.47748        0.83449       -2.31972
H          0.07281       -2.60931       -2.45968
H          1.73613       -2.45523       -2.77152
H          1.72258        1.01876       -2.70959
H          2.69244       -0.37433       -3.00095
S          2.84597       -1.10641        0.06768
O          3.35997        0.32693       -0.29559
O          3.22589       -1.47856        1.41673
O          1.27857       -0.81121        0.04074
H          0.71683       -1.63803        0.01007
O          3.20373       -1.98178       -1.02793
H         -1.24575       -0.71845       -2.21761
S          0.80239        2.88544       -0.13797
O          0.66789        2.35159       -1.50093
O         -0.42801        2.81659        0.67160
O          1.98346        2.34167        0.58397
H          2.81202        1.07994        0.08910
O          1.03933        4.46648       -0.25564
H          1.85939        4.64644       -0.73872
