# Supplementary material for: Role of base strength, cluster structure and charge in sulfuric-acid-driven particle formation
Source: Copernicus journal article supplement (doi:10.5194/acp-19-9753-2019), 2019-08-02
Supplement: Supplementary file 1 [file acp-19-9753-2019-supplement.zip › Acid-Base-Ions_xyz/3a3n.xyz]

33
3a3n.log	Energy: -1424586.4794110
N         -0.22849       -0.47011        2.25179
H         -0.27385        0.56494        2.11373
H         -1.07122       -0.88746        1.79651
H          0.60047       -0.85400        1.76544
H         -0.19975       -0.70565        3.23920
N         -0.10107       -1.47699       -1.55438
H          0.01468       -0.48227       -1.26340
H          0.26536       -2.02694       -0.76887
H         -1.11536       -1.64321       -1.70840
H          0.47061       -1.65894       -2.37472
N          2.93109        2.01181       -0.89095
H          2.09594        2.63209       -0.70753
H          3.71125        2.53190       -1.28146
H          3.20876        1.51925       -0.02155
H          2.65265        1.24360       -1.51317
S          2.88425       -1.19034        0.09648
O          1.67900       -1.82788        0.66121
O          3.41583       -0.06944        0.89607
O          3.96976       -2.38731        0.20569
O          2.75939       -0.85616       -1.33770
H          4.83419       -2.04959       -0.06482
S         -0.23505        2.22608        0.10948
O          0.64030        3.33059       -0.32693
O         -0.49993        2.18156        1.55926
O         -1.60290        2.48341       -0.64313
O          0.30021        0.91351       -0.36335
H         -2.26305        1.78916       -0.37711
S         -3.13531       -0.92784       -0.15557
O         -2.84212       -1.28539       -1.54901
O         -3.25643        0.51639        0.12535
O         -4.61789       -1.52439        0.08817
O         -2.23615       -1.61814        0.80003
H         -5.03604       -1.00634        0.78925
