# Supplementary material for: Role of base strength, cluster structure and charge in sulfuric-acid-driven particle formation
Source: Copernicus journal article supplement (doi:10.5194/acp-19-9753-2019), 2019-08-02
Supplement: Supplementary file 1 [file acp-19-9753-2019-supplement.zip › Acid-Base-Ions_xyz/3a3n1p.xyz]

34
3a3n1p.log	Energy: -1424816.9837757
S         -2.69030       -1.23418       -0.00734
O         -2.90503       -0.50411        1.26521
O         -3.93293       -2.22679       -0.20457
O         -2.77907       -0.36095       -1.19308
H         -3.93467       -2.90702        0.48496
S          2.82776       -1.17260        0.01318
O          3.55225        0.19512        0.14124
O          3.75732       -2.11665        0.88213
O          1.54261       -1.13247        0.68751
H          4.52595       -2.41404        0.36973
S          0.58082        2.21599       -0.09716
O         -0.57164        1.98917        0.81046
O          0.49460        1.47604       -1.36124
O          1.87515        2.06978        0.59410
H         -2.19986        2.22019        0.24830
O         -1.46313       -2.05170        0.02843
N          0.08470       -1.19953       -2.11652
N         -3.16061        2.11417       -0.14567
N         -0.44012       -0.23235        2.50054
H         -3.82328        1.97664        0.61665
H         -3.41967        2.92619       -0.70182
H         -3.13951        1.23533       -0.71855
H          2.89773        0.95871        0.29974
H         -1.40434       -0.51222        2.22281
H         -0.30288       -0.28769        3.50684
H          0.24456       -0.81911        2.00419
H         -0.32037        0.73327        2.15023
H         -0.42393       -1.66101       -1.33218
H          1.04322       -1.56401       -2.17744
H          0.14083       -0.18799       -1.89801
H         -0.42547       -1.34160       -2.98550
O          2.84554       -1.62987       -1.36423
O          0.40135        3.77329       -0.44608
H          1.12506        4.07395       -1.01650
