# Supplementary material for: Role of base strength, cluster structure and charge in sulfuric-acid-driven particle formation
Source: Copernicus journal article supplement (doi:10.5194/acp-19-9753-2019), 2019-08-02
Supplement: Supplementary file 1 [file acp-19-9753-2019-supplement.zip › Acid-Base-Ions_xyz/3A4D.xyz]

61
3A4D.log	Energy: -1657384.3310093
S         -0.79733        2.04287        0.58583
O         -2.25435        1.99260        0.94079
O         -0.28757        3.42739        0.43346
O         -0.02385        1.31809        1.67245
O         -0.59903        1.29501       -0.71781
H         -0.45278       -0.20122       -0.55509
N         -3.52778        0.95237       -1.21755
H         -3.04434        1.29596       -0.34813
H         -1.95804       -1.14280        1.66609
C         -3.49660        2.04693       -2.20676
H         -4.05706        2.89909       -1.81883
H         -3.93517        1.70242       -3.14492
H         -2.45397        2.32808       -2.35601
C         -4.87354        0.45568       -0.87302
H         -4.75455       -0.39017       -0.19487
H         -5.38101        0.12410       -1.78048
H         -5.44404        1.25455       -0.39587
S         -1.70450       -1.99894       -0.84802
O         -0.39862       -1.20877       -0.37640
O         -2.65888       -1.89710        0.29050
O         -1.19257       -3.35573       -1.09193
O         -2.22353       -1.31059       -2.05067
H         -2.96582        0.14677       -1.57566
N          1.63533       -3.00938       -1.06175
H          1.73975       -1.96818       -0.96847
H          0.65229       -3.18833       -1.33136
C          1.85248       -3.62421        0.26807
H          1.77375       -4.70873        0.17671
H          2.83304       -3.32187        0.63814
H          1.07605       -3.25114        0.93323
C          2.58925       -3.46414       -2.09173
H          3.59566       -3.19367       -1.76932
H          2.50655       -4.54497       -2.21782
H          2.35870       -2.96005       -3.03014
S          3.12705       -0.22033        0.41588
O          4.08802       -1.28428        0.68158
O          2.38978       -0.38523       -0.86879
O          3.64036        1.16380        0.55413
O          2.01702       -0.40437        1.57418
H          1.33086        0.31007        1.51046
N          2.21418        3.11690       -0.65595
H          1.27394        3.26331       -0.21478
H          2.69352        2.33769       -0.13874
C          3.02148        4.34137       -0.49951
H          2.53154        5.16792       -1.01708
H          3.10615        4.57073        0.56267
H          4.01521        4.17287       -0.91744
C          2.02096        2.68291       -2.05695
H          1.52384        3.48074       -2.61210
H          2.99439        2.45987       -2.49640
H          1.40174        1.78686       -2.04309
N         -1.55989       -0.71275        2.53017
H         -0.98691        0.11421        2.21360
C         -0.65160       -1.68481        3.17101
H         -1.18902       -2.61421        3.36662
H         -0.27388       -1.26293        4.10375
H          0.18767       -1.85808        2.49690
C         -2.66649       -0.23488        3.38130
H         -3.31885       -1.07205        3.63636
H         -3.21124        0.52692        2.82339
H         -2.25436        0.20912        4.28883
