# Supplementary material for: Role of base strength, cluster structure and charge in sulfuric-acid-driven particle formation
Source: Copernicus journal article supplement (doi:10.5194/acp-19-9753-2019), 2019-08-02
Supplement: Supplementary file 1 [file acp-19-9753-2019-supplement.zip › Acid-Base-Ions_xyz/3A4D1P.xyz]

62
3A4D1P.log	Energy: -1657636.7121676
S         -0.94887       -2.06224        0.04658
O         -0.04511       -3.19257        0.29706
O         -2.01547       -2.31458       -0.93166
O         -1.48214       -1.45081        1.30545
O          0.04462       -0.96868       -0.57343
H          0.21358        2.50989       -0.91953
N          0.85039       -0.49473        2.66093
H         -0.03845       -0.89382        2.31534
H          1.23674        0.07866        1.87922
O          3.36007       -0.78223        0.01802
O          2.03810        1.14865        0.82518
S          3.08440        0.66453       -0.09465
O          2.89810        1.12409       -1.48091
O          4.39867        1.41159        0.48117
H          5.16563        1.17959       -0.06174
H         -3.54578       -1.48079       -0.82272
H          1.74123        2.57312       -1.49935
N          0.92956        3.17302       -1.27141
C          1.29603        4.13280       -0.20005
C          0.38430        3.81098       -2.49162
C          1.79492       -1.60094        2.94518
C          0.59577        0.40657        3.81117
H         -0.10048        1.18184        3.49181
H          1.54078        0.85494        4.11906
H          0.17033       -0.17024        4.63323
H          1.41835       -2.18788        3.78351
H          2.77160       -1.17945        3.18345
H          1.86651       -2.22564        2.05611
H         -0.51584        4.36271       -2.21946
H          1.12998        4.48735       -2.91071
H          0.13538        3.03328       -3.21309
H          2.04457        4.82548       -0.58681
H          0.39601        4.66365        0.10835
H          1.70019        3.56482        0.63664
S         -2.05944        1.94742        0.21074
O         -1.76460        3.35161        0.41456
O         -1.12726        1.32050       -0.79632
O         -3.45838        1.59179       -0.07806
H         -0.42153       -0.08410       -0.68865
O         -1.69160        1.22836        1.60938
H         -1.79441        0.25445        1.49914
N         -4.38721       -0.91833       -0.58760
C         -4.94382       -1.42819        0.68818
C         -5.34243       -0.91931       -1.71856
H         -4.03490        0.05340       -0.43179
H         -5.31537       -2.44247        0.53781
H         -4.14497       -1.43653        1.42976
H         -5.75349       -0.77397        1.01250
H         -5.67391       -1.94038       -1.91047
H         -6.19660       -0.29086       -1.46470
H         -4.84224       -0.51924       -2.60007
N          2.23388       -2.89406       -1.31138
H          1.37520       -3.11843       -0.77233
H          2.60805       -2.02640       -0.87060
C          3.22411       -3.98262       -1.14857
C          1.87088       -2.60563       -2.71912
H          4.14279       -3.71129       -1.66935
H          3.43052       -4.11438       -0.08669
H          2.81799       -4.90561       -1.56371
H          2.76719       -2.30510       -3.26248
H          1.44031       -3.50083       -3.16920
H          1.14274       -1.79596       -2.72229
