# Supplementary material for: Role of base strength, cluster structure and charge in sulfuric-acid-driven particle formation
Source: Copernicus journal article supplement (doi:10.5194/acp-19-9753-2019), 2019-08-02
Supplement: Supplementary file 1 [file acp-19-9753-2019-supplement.zip › Acid-Base-Ions_xyz/3a4g.xyz]

57
3a4g.log	Energy: -1833619.3569765
C          3.52845        1.97744        1.03398
N          3.25280        1.96353       -0.26778
N          4.31028        1.01722        1.54887
N          3.05574        2.97266        1.78703
H          3.54768        1.16511       -0.81729
H          2.30879        3.54435        1.36343
H          3.08562        2.89176        2.78960
H          4.53537        0.21443        0.96209
H          4.43102        0.94188        2.54422
C         -3.59340        1.97974       -1.00050
N         -3.18340        3.02272       -1.72609
N         -4.34684        1.00670       -1.53312
N         -3.28600        1.92989        0.29300
H         -3.23034        2.97100       -2.73008
H         -2.62451        2.62322        0.64685
H         -3.52289        1.09599        0.81668
H         -4.50649        0.97406       -2.52519
H         -4.52091        0.17104       -0.97675
S         -3.55773       -2.23043        0.63055
O         -2.84990       -2.55306        1.88271
O         -4.12291       -0.86895        0.59613
O         -2.77720       -2.56390       -0.57773
H         -2.43621        3.59630       -1.30438
O         -4.88523       -3.15666        0.59554
H         -4.61872       -4.08057        0.69836
C         -0.05103       -0.89554       -1.72155
N          1.01608       -0.17791       -2.07680
N         -0.01328       -2.23401       -1.75303
N         -1.17019       -0.26319       -1.37805
H          1.88420       -0.66055       -2.27242
H         -1.09150        0.74787       -1.22289
H         -1.95321       -0.81667       -1.05300
H          0.88876       -2.68576       -1.85662
H         -0.80174       -2.73976       -1.36877
S         -0.04848        3.11798       -0.00060
O         -1.28295        3.96227        0.03978
O         -0.09396        2.25029       -1.23768
O          1.20899        3.92996       -0.02581
H          2.57751        2.64969       -0.61255
O         -0.02686        2.23231        1.22531
H          0.96544        0.82829       -1.91139
C          0.05534       -0.90760        1.74745
N          0.07334       -2.24686        1.77919
N         -1.04067       -0.23614        2.10649
N          1.14593       -0.22817        1.40383
H         -0.81248       -2.73345        1.86703
H          1.94385       -0.75075        1.06013
H          1.01918        0.77790        1.24220
H         -1.88958       -0.75170        2.30005
H         -1.03787        0.76845        1.92881
S          3.64182       -2.10888       -0.65899
O          4.28547       -0.77339       -0.66845
O          2.91983       -2.38589       -1.91485
O          4.84067       -3.19297       -0.57402
H          5.33029       -3.17166       -1.40803
O          2.87725       -2.36974        0.56773
H          0.88060       -2.72062        1.39424
