# Supplementary material for: Role of base strength, cluster structure and charge in sulfuric-acid-driven particle formation
Source: Copernicus journal article supplement (doi:10.5194/acp-19-9753-2019), 2019-08-02
Supplement: Supplementary file 1 [file acp-19-9753-2019-supplement.zip › Acid-Base-Ions_xyz/3a4g1p.xyz]

58
3a4g1p.log	Energy: -1833870.2207102
C          3.78118        1.95020       -0.67084
N          3.49312        3.23156       -0.94885
N          4.60458        1.25760       -1.46215
N          3.26654        1.37034        0.40381
H          3.68363        3.59834       -1.86718
H          2.80093        3.73009       -0.40061
H          2.50917        1.80699        0.92748
H          3.54298        0.42320        0.67093
H          4.61134        0.23802       -1.40015
H          5.08033        1.70081       -2.23040
C         -0.01982       -1.08460        2.06834
N         -1.16313       -0.44062        2.34261
N          1.13844       -0.54729        2.46312
N         -0.04420       -2.24750        1.42960
H         -1.15144        0.30218        3.02320
H         -0.92492       -2.63667        1.09894
H          0.81528       -2.63402        1.04155
H          1.14878        0.44955        2.63580
H          2.01511       -0.97908        2.17442
S         -3.60259       -2.14063       -0.03080
O         -3.81482       -1.36041       -1.27484
O         -2.40643       -2.99867       -0.12270
O         -3.64401       -1.29178        1.17479
H         -2.05990       -0.85495        2.09083
O         -4.87197       -3.09789        0.15931
H         -4.85398       -3.80220       -0.50538
C         -3.82136        2.05383       -0.63521
N         -3.55268        3.34777       -0.85898
N         -4.63198        1.36949       -1.44543
N         -3.27910        1.45390        0.41665
H         -3.79571        3.77954       -1.73494
H         -2.60163        1.96848        0.97012
H         -3.54278        0.50481        0.68605
H         -5.09173        1.81968       -2.21927
H         -4.63686        0.34930       -1.39576
S          0.07358        3.00458        0.65633
O          0.13041        2.35471       -0.66021
O          0.84710        2.31527        1.70592
O          0.90921        4.38646        0.36839
H          0.84116        4.96509        1.14271
O         -1.27277        3.41284        1.08391
H         -2.85886        3.80317       -0.27540
C         -0.02108       -0.86973       -1.62569
N          1.14320       -0.22560       -1.56067
N         -1.15225       -0.17074       -1.53491
N         -0.05493       -2.19477       -1.81712
H          1.13096        0.75891       -1.32036
H          0.79538       -2.70770       -1.60505
H         -0.92359       -2.66963       -1.59007
H         -1.08998        0.81731       -1.32241
H         -2.06473       -0.61904       -1.58496
S          3.51929       -2.23167       -0.03463
O          2.28732       -3.03855       -0.13371
O          3.77449       -1.46931       -1.28176
O          3.58735       -1.38039        1.16669
H          2.03256       -0.71710       -1.61801
O          4.74304       -3.24429        0.16930
H          4.70591       -3.94277       -0.50065
