# Supplementary material for: Role of base strength, cluster structure and charge in sulfuric-acid-driven particle formation
Source: Copernicus journal article supplement (doi:10.5194/acp-19-9753-2019), 2019-08-02
Supplement: Supplementary file 1 [file acp-19-9753-2019-supplement.zip › Acid-Base-Ions_xyz/3a4n.xyz]

37
3a4n.log	Energy: -1460094.9718902
S         -3.18442       -1.17287       -0.19753
O         -3.11989       -0.54428        1.15800
O         -2.99041        0.04975       -1.23176
O         -1.98085       -2.04810       -0.36855
H         -2.07591        0.44934       -1.14483
S          3.18436       -1.17293        0.19757
O          3.12022       -0.54499       -1.15829
O          2.99037        0.05030        1.23116
O          1.98062       -2.04784        0.36881
H          2.07579        0.44981        1.14419
S          0.00002        1.93169       -0.00010
O          0.56552        1.03473        1.08462
O          1.08743        2.77809       -0.55964
O         -1.08725        2.77831        0.55946
O         -0.56560        1.03473       -1.08470
H         -4.07613        2.63491        1.52742
O         -4.44914       -1.77161       -0.55180
N          3.59707        2.07534       -0.82801
N         -3.59669        2.07572        0.82804
N          0.31024       -1.44971       -1.76697
N         -0.31053       -1.44935        1.76730
H          0.17672       -0.42257       -1.62322
H         -0.60572       -1.88604       -1.57023
H          0.65099       -1.64794       -2.70251
H          1.00154       -1.77657       -1.05832
H         -4.07876        2.13348       -0.06709
H         -3.55230        1.05848        1.09995
H         -2.58248        2.39802        0.70588
H          0.60530       -1.88625        1.57150
H         -1.00160       -1.77624        1.05843
H         -0.65204       -1.64678        2.70272
H         -0.17617       -0.42234        1.62304
H          2.58296        2.39792       -0.70648
H          4.07829        2.13244        0.06763
H          4.07742        2.63456       -1.52674
H          3.55256        1.05825       -1.10021
O          4.44893       -1.77169        0.55238
