# Supplementary material for: Role of base strength, cluster structure and charge in sulfuric-acid-driven particle formation
Source: Copernicus journal article supplement (doi:10.5194/acp-19-9753-2019), 2019-08-02
Supplement: Supplementary file 1 [file acp-19-9753-2019-supplement.zip › Acid-Base-Ions_xyz/3a4n1p.xyz]

38
3a4n1p.log	Energy: -1460334.9790639
S          2.25825       -1.79227       -0.04265
O          1.05748       -1.26115       -0.74776
O          2.36214       -3.25442       -0.72035
O          3.49466       -1.07810       -0.37486
H          3.12824       -3.72707       -0.36225
S         -3.08115       -0.53946        0.23007
O         -3.21327        0.73821        0.94730
O         -4.52413       -1.25277        0.24638
O         -2.81451       -0.39660       -1.21632
H         -4.86225       -1.29842        1.15278
S          0.86051        2.31627       -0.08978
O          1.29861        1.63790        1.15647
O          2.02042        2.68067       -0.92326
O         -0.12579        3.38445        0.09270
O          0.00520        1.20983       -0.90238
H          0.49241        0.35250       -0.91773
O          2.04227       -1.99271        1.39392
N         -0.03411       -0.42154        2.39872
N         -2.54897        2.66920       -0.90901
N         -1.16012       -2.55508       -1.66566
N          4.19092        1.53282        0.15943
H         -1.51032       -3.21259       -0.96922
H         -1.82981       -1.75150       -1.70232
H         -0.24073       -2.18132       -1.33551
H         -1.06372       -3.01023       -2.57067
H         -3.18605        3.37094       -1.27743
H         -1.65607        3.09498       -0.56171
H         -2.97635        2.13334       -0.12794
H         -2.31422        1.97702       -1.62434
H          4.00060        0.51803        0.01798
H          4.14137        1.74834        1.15371
H          5.10592        1.78109       -0.21017
H          3.42061        2.06621       -0.33002
H          0.71861       -1.11447        2.23612
H         -0.88158       -0.74263        1.88962
H          0.31186        0.47847        2.00087
H         -0.23424       -0.32149        3.39057
O         -2.14057       -1.47677        0.88577
