# Supplementary material for: Role of base strength, cluster structure and charge in sulfuric-acid-driven particle formation
Source: Copernicus journal article supplement (doi:10.5194/acp-19-9753-2019), 2019-08-02
Supplement: Supplementary file 1 [file acp-19-9753-2019-supplement.zip › Acid-Base-Ions_xyz/3a5g1p.xyz]

67
3a5g1p.log	Energy: -1962756.1292953
C         -6.60240        0.00006       -0.00000
N         -5.93760       -1.02448        0.52037
N         -5.93757        1.02458       -0.52035
N         -7.94947        0.00007       -0.00002
H         -4.91573       -1.11843        0.37006
H         -6.42009       -1.72196        1.06269
H         -8.47058       -0.82951        0.23011
H         -8.47056        0.82967       -0.23017
H         -6.42003        1.72208       -1.06269
H         -4.91570        1.11851       -0.37002
C         -1.07157        3.58358        1.09477
N         -2.07952        3.14037        1.85377
N         -0.10451        4.35353        1.59664
N         -1.04484        3.27229       -0.20014
H         -2.03331        3.23711        2.85447
H         -1.75352        2.65057       -0.57341
H         -0.23721        3.55685       -0.74804
H         -0.05063        4.54387        2.58291
H          0.68393        4.59487        0.99404
C         -1.07165       -3.58363       -1.09466
N         -2.07963       -3.14044       -1.85365
N         -0.10461       -4.35359       -1.59655
N         -1.04488       -3.27231        0.20023
H         -2.03344       -3.23718       -2.85434
H         -1.75352       -2.65055        0.57350
H         -0.23723       -3.55684        0.74811
H         -0.05078       -4.54398       -2.58281
H          0.68386       -4.59492       -0.99397
S          2.91817       -3.61845        0.64314
O          3.20324       -2.93497        1.91790
O          1.59797       -4.29920        0.66028
O          3.10894       -2.79506       -0.55966
H         -2.67982       -2.41063       -1.46137
O          4.02959       -4.77051        0.47393
H          4.09980       -5.26662        1.30223
C          1.68579        0.00411       -1.75204
N          1.01375        1.08971       -2.14378
N          3.02032        0.00050       -1.74743
N          1.01084       -1.09041       -1.40465
H          1.53107        1.93799       -2.34737
H          0.00721       -0.99124       -1.26745
H          1.53795       -1.88291       -1.04811
H          3.51118        0.87714       -1.88561
H          3.50314       -0.81021       -1.38050
S         -2.39343        0.00000       -0.00001
O         -3.26980       -1.23301       -0.08754
O         -1.55367        0.08035       -1.23020
O         -3.26978        1.23301        0.08764
H         -2.67973        2.41057        1.46149
O         -1.55350       -0.08035        1.23007
H          0.00696        1.08606       -2.02855
C          1.68591       -0.00412        1.75204
N          3.02044       -0.00051        1.74746
N          1.01386       -1.08971        2.14378
N          1.01098        1.09040        1.40461
H          3.51129       -0.87716        1.88564
H          1.53811        1.88289        1.04808
H          0.00735        0.99122        1.26736
H          1.53117       -1.93800        2.34736
H          0.00707       -1.08607        2.02850
S          2.91818        3.61845       -0.64319
O          1.59799        4.29921       -0.66025
O          3.20316        2.93493       -1.91795
O          4.02963        4.77050       -0.47408
H          4.09977        5.26660       -1.30240
O          3.10904        2.79508        0.55961
H          3.50327        0.81018        1.38053
