# Supplementary material for: Role of base strength, cluster structure and charge in sulfuric-acid-driven particle formation
Source: Copernicus journal article supplement (doi:10.5194/acp-19-9753-2019), 2019-08-02
Supplement: Supplementary file 1 [file acp-19-9753-2019-supplement.zip › Acid-Base-Ions_xyz/3a5n1p.xyz]

42
3a5n1p.log	Energy: -1495838.6005574
S         -1.27943        1.92019       -0.05989
O         -1.74774        1.66048        1.34143
O         -2.54953        1.56437       -0.98155
O         -0.97888        3.32845       -0.31499
O         -0.20218        0.99516       -0.43729
H         -2.49282        0.60275       -1.22012
S         -2.33589       -1.93674       -0.15210
O         -1.02995       -2.19793        0.47319
O         -2.84007       -3.32912       -0.77552
O         -3.36927       -1.48911        0.79851
O         -2.23819       -1.08446       -1.36319
H         -2.94233       -3.98436       -0.06968
N          1.84710        3.16706       -0.51083
H          2.42645        3.98398       -0.68682
H          2.10238        2.71083        0.38012
H          2.03785        2.41170       -1.19734
H          0.83673        3.40640       -0.50757
N          0.54235       -1.15733       -2.06651
H         -0.47015       -1.02848       -1.89517
H          0.98923       -1.55293       -1.21878
H          1.01524       -0.25054       -2.18544
H          0.70449       -1.75997       -2.86935
N          0.24916       -0.24631        2.10554
H          1.13500        0.17496        1.74365
H         -0.06036       -0.99970        1.46574
H          0.38455       -0.61914        3.04139
H         -0.48980        0.47586        2.09312
N         -4.37274        0.99672        1.24060
H         -5.00648        1.07495        2.03267
H         -4.16268       -0.00451        1.02190
H         -4.76804        1.45386        0.41982
H         -3.43632        1.42684        1.43821
S          2.95786        0.04476       -0.11523
O          4.50760       -0.09542       -0.08340
O          2.63391        0.68212       -1.41841
O          2.55177        0.92514        1.02669
O          2.36060       -1.30567        0.03014
N          5.29654       -2.26046        1.08446
H          4.50563       -2.89928        1.07991
H          6.05220       -2.69441        0.56188
H          4.82756       -0.95932        0.42534
H          5.60949       -2.15067        2.04455
