# Supplementary material for: Role of base strength, cluster structure and charge in sulfuric-acid-driven particle formation
Source: Copernicus journal article supplement (doi:10.5194/acp-19-9753-2019), 2019-08-02
Supplement: Supplementary file 1 [file acp-19-9753-2019-supplement.zip › Acid-Base-Ions_xyz/3D.xyz]

30
3D.log	Energy: -254410.5955320
N         -0.67776        1.62792        0.03498
H         -1.02117        0.67979        0.21241
H          1.16020        0.60050       -0.38774
N          1.76679       -0.21305       -0.25833
C          2.89351       -0.16917       -1.17314
C          2.17313       -0.26148        1.13607
C         -1.43699        2.22589       -1.04925
C         -0.72839        2.41303        1.25575
H         -0.19564        1.88760        2.05377
H         -1.75609        2.61931        1.60404
H         -0.23028        3.37692        1.09953
H         -0.98381        3.18096       -1.33937
H         -2.49319        2.42076       -0.79153
H         -1.41423        1.56596       -1.92137
H          2.70182       -1.20005        1.33941
H          2.83669        0.57035        1.43108
H          1.28395       -0.23026        1.77390
H          3.59243        0.66160       -0.96984
H          3.46140       -1.10444       -1.10835
H          2.53051       -0.06900       -2.19974
N         -1.02327       -1.43537        0.05222
H         -0.02785       -1.32812       -0.15969
C         -1.74079       -1.79015       -1.16022
C         -1.20818       -2.40236        1.11978
H         -1.50193       -1.07143       -1.94980
H         -1.50170       -2.80193       -1.53240
H         -2.82140       -1.74702       -0.98099
H         -2.25616       -2.40652        1.44114
H         -0.94286       -3.43410        0.82855
H         -0.59477       -2.12200        1.98092
