# Supplementary material for: Role of base strength, cluster structure and charge in sulfuric-acid-driven particle formation
Source: Copernicus journal article supplement (doi:10.5194/acp-19-9753-2019), 2019-08-02
Supplement: Supplementary file 1 [file acp-19-9753-2019-supplement.zip › Acid-Base-Ions_xyz/3D1P.xyz]

31
3D1P.log	Energy: -254675.8600471
N         -2.24106       -0.61910       -0.41310
H         -2.47180       -0.80473       -1.38574
C         -1.95793       -1.89861        0.24883
C         -3.37147        0.08795        0.20373
H         -1.63430       -1.70875        1.27709
H         -2.83383       -2.55837        0.28620
H         -1.15217       -2.41572       -0.27735
H         -3.11552        0.34518        1.23607
H         -4.28734       -0.51587        0.22276
H         -3.57294        1.01143       -0.34435
N         -0.00777        1.03262       -0.12612
H          0.89179        0.47865       -0.30125
H         -0.83843        0.37777       -0.29062
C         -0.07796        2.14832       -1.09347
C         -0.02508        1.46974        1.28659
H          0.83755        2.10777        1.48677
H          0.01725        0.58982        1.93012
H         -0.94214        2.02555        1.49010
H          0.77829        2.81090       -0.95523
H         -0.06355        1.74251       -2.10566
H         -1.00040        2.71135       -0.94047
N          2.36324       -0.40315       -0.45712
C          2.02761       -1.82717       -0.33882
C          3.30349        0.03614        0.58262
H          2.79370       -0.24810       -1.36502
H          1.48368       -1.99250        0.59679
H          1.38464       -2.12371       -1.17127
H          2.91494       -2.47253       -0.33413
H          2.83019       -0.06663        1.56384
H          4.22947       -0.55232        0.58958
H          3.55812        1.08746        0.42931
