# Supplementary material for: Role of base strength, cluster structure and charge in sulfuric-acid-driven particle formation
Source: Copernicus journal article supplement (doi:10.5194/acp-19-9753-2019), 2019-08-02
Supplement: Supplementary file 1 [file acp-19-9753-2019-supplement.zip › Acid-Base-Ions_xyz/3g.xyz]

27
3g.log	Energy: -386566.8159672
C         -1.00836       -1.97540        0.04188
N         -2.25239       -1.98408       -0.33591
N          0.05404       -2.52199       -0.64922
N         -0.65737       -1.41703        1.23979
H         -2.37240       -2.50580       -1.19966
H         -1.38754       -0.86951        1.66999
H          0.28684       -1.03584        1.28838
H         -0.10549       -2.68628       -1.63061
H          0.95972       -2.10958       -0.42745
C          2.73306        0.30654        0.06902
N          2.22016       -0.75737        0.60401
N          4.09581        0.57462       -0.00017
N          1.95462        1.26761       -0.49833
H          2.92625       -1.30445        1.08877
H          0.94000        1.11672       -0.59951
H          2.36924        1.81845       -1.23377
H          4.69088       -0.02817        0.54668
H          4.36106        1.54757        0.04720
C         -1.83239        1.52980       -0.15918
N         -0.92397        1.11202       -0.97765
N         -2.86753        0.78868        0.34997
N         -1.79381        2.83988        0.29260
H         -1.17171        0.18797       -1.32318
H         -0.95694        3.32759        0.00801
H         -2.03668        2.97788        1.26284
H         -2.94060       -0.18943        0.04111
H         -3.72343        1.27086        0.57523
