# Supplementary material for: Role of base strength, cluster structure and charge in sulfuric-acid-driven particle formation
Source: Copernicus journal article supplement (doi:10.5194/acp-19-9753-2019), 2019-08-02
Supplement: Supplementary file 1 [file acp-19-9753-2019-supplement.zip › Acid-Base-Ions_xyz/3g1p.xyz]

28
3g1p.log	Energy: -386839.2453221
C         -0.00000        1.46270        0.07763
N          1.16968        2.05581        0.33415
N         -0.00000        0.22006       -0.40582
N         -1.16968        2.05581        0.33415
H          2.01915        1.55984        0.02569
H          1.21038        3.01615        0.63152
H         -1.21038        3.01615        0.63152
H         -2.01915        1.55984        0.02569
H         -0.89775       -0.18348       -0.67148
H          0.89775       -0.18348       -0.67148
C          3.77024       -0.68661       -0.08294
N          2.96120        0.09286       -0.74073
N          4.96483       -1.15918       -0.54345
N          3.43810       -1.09303        1.18014
H          3.27810        0.24379       -1.69392
H          2.63281       -0.64786        1.59071
H          4.17400       -1.33481        1.82510
H          5.21892       -0.98069       -1.50121
H          5.36694       -1.98679       -0.13203
C         -3.77024       -0.68661       -0.08294
N         -2.96120        0.09286       -0.74073
N         -4.96483       -1.15918       -0.54345
N         -3.43810       -1.09303        1.18014
H         -3.27810        0.24379       -1.69392
H         -4.17400       -1.33481        1.82510
H         -2.63282       -0.64786        1.59071
H         -5.21892       -0.98069       -1.50121
H         -5.36694       -1.98679       -0.13203
