# Supplementary material for: Role of base strength, cluster structure and charge in sulfuric-acid-driven particle formation
Source: Copernicus journal article supplement (doi:10.5194/acp-19-9753-2019), 2019-08-02
Supplement: Supplementary file 1 [file acp-19-9753-2019-supplement.zip › Acid-Base-Ions_xyz/3n.xyz]

12
3n.log	Energy: -106464.3979101
N          1.78744        0.13975        0.00000
N         -1.01474        1.47809        0.00000
H         -1.25832        2.02752        0.81720
H          0.00000        1.33549        0.00000
H         -1.25832        2.02752       -0.81720
H          1.15657       -0.66775        0.00000
H          2.38504        0.07598       -0.81720
H          2.38504        0.07598        0.81720
N         -0.77270       -1.61784        0.00000
H         -1.12672       -2.10350       -0.81720
H         -1.15657       -0.66775        0.00000
H         -1.12672       -2.10350        0.81720
