# Supplementary material for: Role of base strength, cluster structure and charge in sulfuric-acid-driven particle formation
Source: Copernicus journal article supplement (doi:10.5194/acp-19-9753-2019), 2019-08-02
Supplement: Supplementary file 1 [file acp-19-9753-2019-supplement.zip › Acid-Base-Ions_xyz/3n1p.xyz]

13
3n1p.log	Energy: -106717.4002752
N         -2.33588       -0.50880        0.00005
H         -2.32292       -1.24879        0.69829
H         -3.16193        0.05246        0.19571
H         -2.50584       -0.96280       -0.89459
N          0.00000        1.04154       -0.00000
H          0.88734        0.43574       -0.00026
H         -0.88736        0.43577        0.00026
H          0.00028        1.63958        0.82533
H         -0.00026        1.63957       -0.82534
N          2.33588       -0.50880       -0.00005
H          3.16190        0.05243       -0.19589
H          2.32286       -1.24891       -0.69815
H          2.50593       -0.96264        0.89465
