# Supplementary material for: Role of base strength, cluster structure and charge in sulfuric-acid-driven particle formation
Source: Copernicus journal article supplement (doi:10.5194/acp-19-9753-2019), 2019-08-02
Supplement: Supplementary file 1 [file acp-19-9753-2019-supplement.zip › Acid-Base-Ions_xyz/4A.xyz]

28
4A.log	Energy: -1757398.1872844
S          1.85829       -0.83557        0.81549
O          3.14601       -1.18157        1.38528
O          0.65647       -1.26558        1.50534
O          1.72589        0.71717        0.65299
H          2.58708        1.10872        0.34255
O          1.87706       -1.39587       -0.65082
H          0.97112       -1.34051       -1.05422
S          5.41274        0.91523       -0.21946
O          6.63256        1.66294       -0.30084
O          4.12812        1.57952       -0.07669
O          5.58875       -0.15101        0.92389
O          5.23020        0.01752       -1.53375
H          6.09237       -0.31750       -1.82306
H          4.72311       -0.58878        1.12892
S         -1.85831       -0.83568       -0.81540
O         -3.14604       -1.18176       -1.38514
O         -0.65650       -1.26581       -1.50518
O         -1.87708       -1.39576        0.65100
O         -1.72590        0.71708       -0.65314
H         -0.97115       -1.34033        1.05438
H         -2.58709        1.10869       -0.34278
S         -5.41273        0.91526        0.21935
O         -5.58878       -0.15120       -0.92378
O         -5.23007        0.01781        1.53381
O         -4.12813        1.57956        0.07637
O         -6.63256        1.66296        0.30068
H         -6.09222       -0.31718        1.82323
H         -4.72314       -0.58898       -1.12878
