# Supplementary material for: Role of base strength, cluster structure and charge in sulfuric-acid-driven particle formation
Source: Copernicus journal article supplement (doi:10.5194/acp-19-9753-2019), 2019-08-02
Supplement: Supplementary file 1 [file acp-19-9753-2019-supplement.zip › Acid-Base-Ions_xyz/4A1D.xyz]

38
4A1D.log	Energy: -1842247.4872318
S         -1.61877        3.30354       -0.40272
O         -0.15728        3.63092       -0.90510
O         -2.20112        2.34959       -1.53414
O         -2.37328        4.51669       -0.42424
O         -1.51321        2.51159        0.82214
H          0.40999        2.82381       -0.88397
H         -1.76702        1.46721       -1.46992
S          4.14116       -0.00005        0.48646
O          3.95295       -1.24660       -0.47354
O          3.95300        1.24642       -0.47364
O          5.49210       -0.00007        0.94534
O          3.03498        0.00001        1.44726
H          3.00565       -1.35170       -0.71979
H          3.00569        1.35158       -0.71985
S         -1.61893       -3.30351       -0.40274
O         -0.15716       -3.63096       -0.90428
O         -2.20068       -2.34978       -1.53465
O         -1.51408       -2.51136        0.82204
O         -2.37338       -4.51670       -0.42445
H          0.41002       -2.82378       -0.88334
H         -1.76680       -1.46731       -1.47022
S          0.50354        0.00002       -0.57634
O          0.43963        0.00002        1.00918
O          1.21406       -1.22912       -0.98924
O          1.21408        1.22913       -0.98928
O         -0.92350        0.00001       -0.97852
H          1.38005        0.00002        1.34068
N         -2.35469        0.00019        1.71299
C         -2.12391       -0.00008        3.17610
C         -3.78275        0.00011        1.32053
H         -1.90138       -0.83414        1.30428
H         -1.90151        0.83475        1.30458
H         -4.26054        0.89602        1.71748
H         -4.26034       -0.89606        1.71712
H         -3.84639        0.00032        0.23249
H         -2.57231        0.89552        3.60668
H         -1.04934        0.00001        3.35332
H         -2.57209       -0.89596        3.60632
