# Supplementary material for: Role of base strength, cluster structure and charge in sulfuric-acid-driven particle formation
Source: Copernicus journal article supplement (doi:10.5194/acp-19-9753-2019), 2019-08-02
Supplement: Supplementary file 1 [file acp-19-9753-2019-supplement.zip › Acid-Base-Ions_xyz/4a1g.xyz]

37
4a1g.log	Energy: -1886305.5873032
C         -3.40332        0.37293       -0.03329
N         -3.70309       -0.86513        0.37460
N         -3.46791        1.39946        0.82719
N         -3.13473        0.59939       -1.31723
H         -3.78618       -1.04519        1.36525
H         -2.96253       -0.21005       -1.90099
H         -2.60282        1.43280       -1.54414
H         -3.38810        1.19032        1.81274
H         -3.04971        2.27163        0.52959
S         -0.88387       -0.76997        2.20470
O         -0.72153        0.19248        1.11101
O         -0.83968       -2.20636        1.58864
O          0.35911       -0.68719        3.15328
H          1.18369       -0.57093        2.60932
O         -2.06967       -0.66833        3.02110
H         -3.37277       -1.63348       -0.19852
S          0.16631        2.89123       -0.60489
O          0.84077        4.11662       -0.90216
O         -1.24450        2.71814       -0.92949
O          0.97408        1.69971       -1.30517
H          0.40301        0.93642       -1.62077
O          0.39170        2.58728        0.92302
H          0.02829        1.68972        1.13714
S         -0.51868       -1.71707       -1.88913
O         -0.22913       -0.34236       -2.33967
O         -1.92677       -2.03150       -1.68611
O         -0.07260       -2.67872       -3.09070
H          0.77562       -2.38099       -3.45111
O          0.33354       -2.10562       -0.71831
H         -0.36788       -2.21000        0.69674
S          3.32035       -0.43395        0.43854
O          4.60888       -0.73569        0.97928
O          2.17189       -0.19428        1.31449
O          3.48529        0.83572       -0.48428
H          2.61240        1.20086       -0.75484
O          2.91495       -1.57936       -0.56844
H          1.93095       -1.73317       -0.59196
