# Supplementary material for: Role of base strength, cluster structure and charge in sulfuric-acid-driven particle formation
Source: Copernicus journal article supplement (doi:10.5194/acp-19-9753-2019), 2019-08-02
Supplement: Supplementary file 1 [file acp-19-9753-2019-supplement.zip › Acid-Base-Ions_xyz/4a1n.xyz]

32
4a1n.log	Energy: -1792918.1072382
N         -1.98396        0.35634        2.45813
H         -2.68917        0.60804        3.14577
H         -2.43162        0.12098        1.55797
H         -1.45320       -0.47352        2.76426
S          0.35767       -1.95021        1.37579
O          0.13660       -0.73125        0.59064
O         -0.40956       -2.04699        2.60285
H         -1.32924        1.15919        2.29614
O          0.07475       -3.18396        0.43745
S          2.99261       -0.05911       -0.94494
O          1.58864       -0.09361       -1.68178
O          2.76362        0.95450        0.23361
O          3.22603       -1.34840       -0.28444
O          3.95408        0.39639       -1.90320
H          0.88530       -0.35375       -1.04692
H          2.11168        1.67902        0.00715
S         -2.40125       -0.96802       -1.23916
O         -3.55714       -0.94280       -2.33715
O         -1.73209       -2.25718       -1.35750
O         -1.42380        0.13250       -1.70036
O         -3.06075       -0.62087        0.00274
H         -3.24322       -1.36459       -3.15156
H         -0.60522       -2.93385       -0.23916
O          1.84834       -2.14271        1.72304
H          2.44516       -1.85015        0.94959
S         -0.38806        2.80021        0.42747
O         -0.75016        4.36549        0.43531
O         -0.34530        2.45496        1.84981
O          0.87471        2.67467       -0.31247
H         -0.60642        4.72684       -0.45118
O         -1.52818        2.14091       -0.27785
H         -1.45032        1.00817       -1.11100
