# Supplementary material for: Role of base strength, cluster structure and charge in sulfuric-acid-driven particle formation
Source: Copernicus journal article supplement (doi:10.5194/acp-19-9753-2019), 2019-08-02
Supplement: Supplementary file 1 [file acp-19-9753-2019-supplement.zip › Acid-Base-Ions_xyz/4A2D.xyz]

48
4A2D.log	Energy: -1927086.8661855
S          2.00884        1.88768        0.50135
O          3.27168        1.95552        1.24986
O          2.19537        1.15445       -0.78661
O          1.68684        3.39938        0.12565
H          4.18932        0.62029        0.70146
H          0.78751        3.45519       -0.27084
S          1.73832       -2.11570       -0.60291
O          1.02799       -0.99858       -1.42443
O          0.95588       -3.32321       -0.79553
O          1.66100       -1.61805        0.88582
H          1.42117       -0.07962       -1.20429
N          4.75476       -0.12241        0.22959
C          5.62776       -0.79136        1.21701
H          6.30957       -0.05707        1.64759
H          6.19103       -1.58307        0.72150
H          5.00115       -1.21866        1.99958
C          5.46500        0.50596       -0.90759
H          6.15672        1.25660       -0.52368
H          4.71828        0.97965       -1.54462
H          6.00614       -0.26188       -1.46189
H          0.69312       -1.47134        1.13534
H          4.08756       -0.81737       -0.15180
O          0.87223        1.36597        1.28256
O          3.16595       -2.16116       -0.89824
S         -2.00884       -1.88767        0.50135
O         -3.27168       -1.95552        1.24987
O         -2.19537       -1.15445       -0.78661
O         -1.68684       -3.39938        0.12566
H         -4.18932       -0.62029        0.70146
H         -0.78751       -3.45519       -0.27084
S         -1.73832        2.11570       -0.60290
O         -1.02799        0.99859       -1.42442
O         -0.95588        3.32321       -0.79552
O         -1.66100        1.61805        0.88583
H         -1.42117        0.07962       -1.20429
N         -4.75476        0.12241        0.22959
C         -5.62777        0.79135        1.21700
H         -6.30958        0.05706        1.64758
H         -6.19104        1.58306        0.72149
H         -5.00117        1.21866        1.99957
C         -5.46500       -0.50596       -0.90760
H         -6.15671       -1.25661       -0.52370
H         -4.71827       -0.97965       -1.54462
H         -6.00613        0.26187       -1.46190
H         -0.69312        1.47134        1.13535
H         -4.08757        0.81737       -0.15180
O         -0.87223       -1.36597        1.28256
O         -3.16595        2.16116       -0.89824
