# Supplementary material for: Role of base strength, cluster structure and charge in sulfuric-acid-driven particle formation
Source: Copernicus journal article supplement (doi:10.5194/acp-19-9753-2019), 2019-08-02
Supplement: Supplementary file 1 [file acp-19-9753-2019-supplement.zip › Acid-Base-Ions_xyz/4a2g.xyz]

46
4a2g.log	Energy: -2015205.9882885
C          2.15319       -1.50296        2.18978
N          1.08790       -2.24052        2.52644
N          3.12781       -2.03518        1.44554
N          2.28739       -0.26373        2.66670
H          0.82376       -2.97296        1.87672
H          1.46494        0.18825        3.05017
H          3.02197        0.31489        2.27986
H          2.93729       -2.90992        0.97652
H          3.74446       -1.39195        0.96010
S          1.06706       -1.95744       -1.09200
O          2.36577       -1.81638       -1.76941
O          0.81353       -0.73502       -0.22313
O         -0.00720       -1.89152       -2.24135
H         -0.92587       -1.83851       -1.84773
O          0.90093       -3.17871       -0.31018
H          0.32755       -1.76151        2.99599
S          3.51298        1.31689       -0.79893
O          4.07190        2.61117       -1.05669
O          3.97683        0.53344        0.34364
O          1.93614        1.51713       -0.62805
H          1.48947        0.61886       -0.45930
O          3.62187        0.45644       -2.10416
H          3.18028       -0.44307       -2.00111
C         -1.18174        2.79286       -0.75355
N         -0.27573        3.45200       -0.01769
N         -0.80003        2.15735       -1.85909
N         -2.47745        2.84321       -0.42676
H          0.69403        3.17120       -0.09728
H         -2.69999        2.93629        0.55731
H         -3.09052        2.22173       -0.94797
H          0.18167        2.10704       -2.08800
H         -1.43531        1.46776       -2.25421
S         -1.57073        0.57911        2.31983
O         -0.55264        0.13279        3.26314
O         -2.64544       -0.54683        2.28040
O         -2.15108        1.89496        2.49481
H         -0.56781        3.84098        0.86523
O         -0.98802        0.60310        0.85906
H         -0.42515       -0.17363        0.55963
S         -3.39845       -0.66398       -1.16489
O         -2.29398       -1.62800       -0.99118
O         -3.10004        0.48002       -2.03084
O         -4.56173       -1.42778       -1.97499
H         -4.84467       -2.20025       -1.46535
O         -3.99897       -0.28449        0.13985
H         -3.23058       -0.46250        1.44450
