# Supplementary material for: Role of base strength, cluster structure and charge in sulfuric-acid-driven particle formation
Source: Copernicus journal article supplement (doi:10.5194/acp-19-9753-2019), 2019-08-02
Supplement: Supplementary file 1 [file acp-19-9753-2019-supplement.zip › Acid-Base-Ions_xyz/4a2n.xyz]

36
4a2n.log	Energy: -1828437.8782903
N          0.77832       -1.77368       -0.96926
H          1.75987       -1.88277       -0.64602
H          0.13214       -1.54628       -0.19788
H          0.77063       -0.92775       -1.56392
N         -1.84629        1.83321       -1.73141
H         -1.84270        2.15255       -0.74656
H         -0.89999        1.43949       -1.89049
H         -2.59100        1.11486       -1.77601
S         -1.51650        0.45616        1.45186
O         -2.75293        0.25828        2.19369
O         -1.30514        1.84760        0.96442
O         -1.35616       -0.51557        0.31931
H          0.20732        2.54681        0.50531
S          1.69503        1.44404       -0.52039
O          1.03571        2.78387        0.01632
O          3.03778        1.80519       -0.95053
O          1.68547        0.48286        0.63328
O          0.81810        0.93492       -1.61095
H          0.47098       -2.59927       -1.47686
H         -2.04053        2.59679       -2.37375
O         -0.33548        0.15451        2.46527
H          0.50872        0.30128        1.97677
S          4.62183       -1.16797        0.02635
O          5.15815        0.10483       -0.73523
O          4.04546       -0.58778        1.38311
O          5.74355       -1.99878        0.33349
O          3.49212       -1.71278       -0.73310
H          4.42636        0.74650       -0.91484
H          3.18087       -0.13620        1.21002
S         -4.63663       -0.86013       -0.56934
O         -3.45352       -1.91106       -0.47377
O         -5.02785       -0.59410        0.93483
O         -4.07638        0.37546       -1.12258
O         -5.74847       -1.49253       -1.20832
H         -4.27041       -0.20702        1.44233
H         -2.63947       -1.44873       -0.13303
