# Supplementary material for: Role of base strength, cluster structure and charge in sulfuric-acid-driven particle formation
Source: Copernicus journal article supplement (doi:10.5194/acp-19-9753-2019), 2019-08-02
Supplement: Supplementary file 1 [file acp-19-9753-2019-supplement.zip › Acid-Base-Ions_xyz/4A3D.xyz]

58
4A3D.log	Energy: -2011920.8153562
S         -1.43541       -1.85706        0.37513
O         -0.28100       -2.74152        0.11006
O         -2.71319       -2.57229        0.50741
O         -1.13596       -0.95160        1.51830
O         -1.63398       -0.93650       -0.90756
H          0.20230        2.64152       -0.61482
N          1.42395       -1.59086        2.59285
H          0.65717       -1.29409        1.96604
H          2.12190       -0.81638        2.57443
O          1.62950        0.50275        0.46898
O          3.31409        0.36742        2.22994
S          2.95951        1.00240        0.94975
O          3.04038        2.46599        0.93178
O          4.02595        0.54410       -0.14893
H          3.85213       -0.38887       -0.41735
H         -3.98775       -1.55409       -0.10894
H          1.73925        3.02770       -0.08822
N          1.00518        3.28476       -0.77949
C          0.58452        4.68511       -0.54634
C          1.53240        3.03085       -2.14004
C          2.07699       -2.80725        2.05375
C          0.86476       -1.74675        3.95127
H          0.41566       -0.80156        4.25537
H          1.66586       -2.01758        4.64021
H          0.10143       -2.52527        3.93386
H          1.34494       -3.61264        2.00365
H          2.90742       -3.07462        2.70898
H          2.44289       -2.58716        1.05052
H          0.76218        3.28194       -2.87030
H          2.41958        3.64503       -2.29862
H          1.78953        1.97583       -2.23145
H          1.44492        5.33942       -0.69490
H         -0.21647        4.93762       -1.24085
H          0.20497        4.77117        0.47018
S         -2.23558        2.17345        0.37260
O         -2.16481        3.62005        0.43590
O         -1.19994        1.58238       -0.55534
O         -3.56892        1.60521        0.07952
H         -1.33658        0.02066       -0.77429
O         -1.81759        1.65904        1.82992
H         -1.59245        0.69937        1.77401
N         -4.60269       -0.80998       -0.50004
C         -5.89828       -0.79894        0.20989
C         -4.70219       -0.98572       -1.96531
H         -4.10874        0.09318       -0.30086
H         -6.41227       -1.74696        0.04439
H         -5.71012       -0.65846        1.27404
H         -6.50366        0.02749       -0.16430
H         -5.20733       -1.92799       -2.18276
H         -5.26418       -0.15125       -2.38676
H         -3.69130       -1.00208       -2.37114
S          2.11708       -1.67802       -2.17397
O          3.03462       -1.84601       -1.03736
O          1.04414       -2.81982       -2.13816
O          2.64675       -1.63076       -3.50666
H          0.52001       -2.81228       -1.28388
O          1.28236       -0.36565       -1.90188
H          1.39586       -0.05556       -0.94220
