# Supplementary material for: Role of base strength, cluster structure and charge in sulfuric-acid-driven particle formation
Source: Copernicus journal article supplement (doi:10.5194/acp-19-9753-2019), 2019-08-02
Supplement: Supplementary file 1 [file acp-19-9753-2019-supplement.zip › Acid-Base-Ions_xyz/4A3D1P.xyz]

59
4A3D1P.log	Energy: -2012161.6018339
S         -2.47818       -0.98986        0.17336
O         -2.52174       -2.50268       -0.25864
O         -3.68743       -0.78096        0.97018
O         -1.20642       -0.81903        0.95050
O         -2.44574       -0.14871       -1.05182
H          2.02990        3.42878       -0.07728
N          0.31529       -2.98323        1.92545
H         -0.29485       -2.20260        1.61420
H          1.12957       -2.92056        1.29735
O          2.24405        0.64192       -0.63921
O          1.89570       -0.59022        1.48694
S          2.91061       -0.00343        0.63562
O          3.77877        1.03356        1.16047
O          3.83495       -1.13869        0.06526
H          3.26129       -1.91020       -0.20192
H         -4.47908        0.71649        0.42750
H          3.37377        2.67256        0.52216
N          3.05490        3.52886        0.03621
C          3.32770        4.71705        0.88108
C          3.68157        3.57372       -1.30869
C         -0.37227       -4.28163        1.70367
C          0.71673       -2.75106        3.33536
H          1.20041       -1.77861        3.40229
H          1.40695       -3.53760        3.64164
H         -0.17632       -2.77766        3.96030
H         -1.32091       -4.27443        2.24046
H          0.26490       -5.08445        2.07549
H         -0.54412       -4.40686        0.63588
H          3.29712        4.43825       -1.85019
H          4.76307        3.65074       -1.19469
H          3.42486        2.65486       -1.83423
H          4.40355        4.80992        1.03107
H          2.94027        5.60457        0.38051
H          2.82783        4.58633        1.84031
S         -0.67394        2.46334       -0.11006
O          0.26800        3.55588       -0.25575
O         -0.53512        1.55940       -1.37960
O         -2.07359        2.79790        0.11125
H         -1.22879        0.82335       -1.36559
O         -0.13869        1.58933        1.07778
H         -0.54195        0.66766        1.09346
N         -4.66075        1.65101        0.01058
C         -5.43617        2.48743        0.95749
C         -5.29162        1.47464       -1.32075
H         -3.71837        2.05761       -0.10509
H         -6.40666        2.02242        1.13205
H         -4.88327        2.55873        1.89361
H         -5.56955        3.48145        0.53007
H         -6.26611        1.00323       -1.19106
H         -5.40861        2.45077       -1.79232
H         -4.64252        0.83715       -1.92010
S          0.95953       -2.58318       -1.59710
O          1.91684       -2.88807       -0.50813
O         -0.32413       -3.29009       -1.45569
H         -1.72330       -2.73811       -0.80953
O          0.79073       -1.13665       -1.83963
H          1.62609       -0.00211       -1.11233
O          1.69478       -3.20465       -2.87599
H          1.11686       -3.14496       -3.65133
