# Supplementary material for: Role of base strength, cluster structure and charge in sulfuric-acid-driven particle formation
Source: Copernicus journal article supplement (doi:10.5194/acp-19-9753-2019), 2019-08-02
Supplement: Supplementary file 1 [file acp-19-9753-2019-supplement.zip › Acid-Base-Ions_xyz/4a3g.xyz]

55
4a3g.log	Energy: -2144104.4750938
C         -0.08031       -0.31524       -2.35887
N          0.11891       -1.63992       -2.35349
N          0.95068        0.50862       -2.57292
N         -1.30923        0.17305       -2.22850
H          1.08384       -1.95077       -2.31303
H         -2.10222       -0.45885       -2.13205
H         -1.46141        1.16640       -2.08578
H          1.88492        0.11628       -2.52479
H          0.81481        1.50817       -2.46928
S         -3.24973       -2.44631       -0.58236
O         -3.99222       -1.95534        0.59146
O         -3.49152       -1.65548       -1.79526
O         -1.80628       -2.68133       -0.32660
H         -0.56464       -2.20536       -1.85903
O         -3.77790       -3.94362       -0.87494
H         -4.71241       -3.89830       -1.12138
C         -2.57604        0.85453        1.70378
N         -1.66806        1.75161        2.10426
N         -3.31451        1.08049        0.61542
N         -2.79168       -0.23645        2.44174
H         -1.45219        2.54870        1.50884
H         -2.14935       -0.43687        3.19460
H         -3.27443       -1.02111        2.00507
H         -3.00467        1.78014       -0.05468
H         -3.94604        0.35312        0.30472
S         -0.74723        3.72181       -0.93935
O          0.49712        3.29349       -1.61049
O         -0.59864        3.92677        0.51185
O         -1.06877        5.21096       -1.46777
H         -1.19147        5.18365       -2.42715
O         -1.90723        2.88262       -1.30170
H         -0.90289        1.38858        2.66127
C          2.32939        1.96214        1.45252
N          1.48613        2.78408        2.08584
N          3.05947        1.08325        2.15680
N          2.49463        2.05144        0.14038
H          1.46148        2.80571        3.09104
H          1.88493        2.64260       -0.42122
H          2.99079        1.28739       -0.31187
H          2.69931        0.77571        3.04799
H          3.56698        0.38324        1.61974
S          0.47610       -1.13158        1.89624
O          0.21826       -0.34536        3.10111
O          0.44383       -0.44096        0.61978
O          1.85795       -1.81389        2.13484
H          0.85180        3.38085        1.55592
O         -0.53771       -2.32796        1.88745
H         -1.01773       -2.44454        1.00343
S          3.67187       -1.61392       -0.85064
O          3.98935       -0.36051       -0.15325
O          3.05721       -1.43885       -2.17639
O          5.13068       -2.25807       -1.10125
H          5.02514       -3.07641       -1.60643
O          2.93631       -2.59826       -0.01709
H          2.27300       -2.16383        1.26667
