# Supplementary material for: Role of base strength, cluster structure and charge in sulfuric-acid-driven particle formation
Source: Copernicus journal article supplement (doi:10.5194/acp-19-9753-2019), 2019-08-02
Supplement: Supplementary file 1 [file acp-19-9753-2019-supplement.zip › Acid-Base-Ions_xyz/4a3n.xyz]

40
4a3n.log	Energy: -1863949.9509747
S         -1.13542       -2.42206        0.49053
O         -1.15173       -1.98537       -0.93813
O         -2.57340       -3.04486        0.78346
O         -0.18350       -3.49107        0.75456
H         -3.25177       -2.36585        0.58261
S          3.16004       -0.69268       -0.49648
O          3.55084       -1.00529        0.89157
O          1.53441       -0.73767       -0.48385
O          3.53655        0.65223       -0.94758
H          1.13559        0.17835       -0.49598
S          1.08650        2.69649        0.43081
O          0.32337        3.95168        0.39169
O          0.42967        1.63556       -0.41081
O          1.38358        2.19875        1.78249
O          2.45965        3.03936       -0.28611
H          2.95105        2.19886       -0.48193
O         -0.99712       -1.25006        1.40362
N         -1.62058        3.25721       -1.33472
N          1.47935       -0.42163        2.54959
N          1.32635       -3.32211       -1.65157
H          1.58182       -0.58484        3.54682
H          0.62794       -0.88082        2.18964
H          1.40684        0.60082        2.34763
H          2.31575       -0.76743        2.02089
H          2.24642       -2.79350       -1.61818
H          1.09736       -3.69684       -0.72014
H          0.57176       -2.65039       -1.84064
H          1.33911       -4.06372       -2.34581
H         -1.61065        3.72952       -2.23462
H         -1.08893        2.37014       -1.38335
H         -2.58518        3.04875       -1.04460
H         -1.08454        3.80063       -0.61866
O          3.49745       -1.77464       -1.44554
S         -3.30534        0.54255       -0.27641
O         -2.29286        0.27694       -1.46003
O         -2.38010        0.94042        0.93238
O         -4.02099        1.74714       -0.63521
O         -4.01719       -0.68544        0.03078
H         -1.81406        0.15682        1.19575
H         -1.81594       -0.60518       -1.32398
