# Supplementary material for: Role of base strength, cluster structure and charge in sulfuric-acid-driven particle formation
Source: Copernicus journal article supplement (doi:10.5194/acp-19-9753-2019), 2019-08-02
Supplement: Supplementary file 1 [file acp-19-9753-2019-supplement.zip › Acid-Base-Ions_xyz/4a3n1p.xyz]

41
4a3n1p.log	Energy: -1864177.2443672
S          1.37347        2.28324       -0.07378
O          1.15249        2.10814        1.37090
O          2.48739        3.42241       -0.26824
O          2.06392        1.11835       -0.69678
H          2.18360        4.26463        0.10111
S         -4.79002       -0.15837       -0.39584
O         -4.54415        1.25437       -0.20772
O         -3.99372       -0.70393       -1.63547
O         -4.59131       -1.05752        0.73052
H         -3.03460       -0.81763       -1.36051
S         -1.18266       -1.25564        0.69060
O          0.15701       -1.85514        0.71380
O         -1.55378       -0.84492       -0.70789
O         -1.35731       -0.15222        1.64846
O         -2.16912       -2.42520        1.09941
H         -3.08703       -2.07725        1.13948
O          0.16528        2.68988       -0.79943
N          1.81325       -0.41777        2.43149
N         -2.11758        2.35664        0.79579
N          0.89468       -0.98522       -2.07761
H         -1.82020        1.46654        1.24684
H         -3.01778        2.17452        0.33000
H         -2.22272        3.08989        1.49307
H         -1.37821        2.61292        0.11446
H          0.96799       -1.07173       -3.08878
H         -0.08847       -1.04934       -1.75423
H          1.46459       -1.70385       -1.61810
H          1.27316       -0.07498       -1.75338
H          1.18519       -1.05762        1.90335
H          1.56708        0.55592        2.16653
H          2.78395       -0.61077        2.14185
H          1.69774       -0.55572        3.43276
S          4.40134       -1.07407       -0.30372
O          4.56649        0.35376       -0.94209
O          5.80134       -1.69760       -0.67269
O          4.29233       -0.95112        1.14307
O          3.40603       -1.84374       -1.01246
H          6.49885       -1.36646       -0.08465
H          3.70241        0.84504       -0.85339
O         -6.26642       -0.26954       -0.93266
H         -6.57403       -1.19010       -0.92619
