# Supplementary material for: Role of base strength, cluster structure and charge in sulfuric-acid-driven particle formation
Source: Copernicus journal article supplement (doi:10.5194/acp-19-9753-2019), 2019-08-02
Supplement: Supplementary file 1 [file acp-19-9753-2019-supplement.zip › Acid-Base-Ions_xyz/4A4D.xyz]

68
4A4D.log	Energy: -2096755.6255327
S          3.16082       -1.70189       -0.57164
O          3.02898       -0.84294        0.66033
O          2.33956       -0.93125       -1.71005
O          4.52773       -1.73846       -1.06010
O          2.48099       -2.99749       -0.35746
H          1.36800       -0.99045       -1.50398
S         -0.95016       -2.37986       -0.70403
O         -0.24223       -1.18417       -1.22857
O         -0.02656       -3.63611       -1.02469
O         -2.20860       -2.67571       -1.40326
O         -1.12115       -2.30099        0.76738
H          0.92178       -3.42978       -0.81071
S          0.95327        2.39367        0.68902
O          0.02593        3.64883        1.00326
O          2.21316        2.70003        1.38124
O          1.11937        2.30380       -0.78223
O          0.25203        1.19964        1.22604
N          4.29755        1.49170        0.08630
C          4.31185        1.70690       -1.37917
H          3.81205        0.58560        0.29497
H          3.67804        2.18811        0.54446
C          5.63354        1.45103        0.71132
N          0.96543       -1.51625        2.37438
C          1.39968       -2.89728        2.68926
C          0.67926       -0.69664        3.57194
H          1.69469       -1.07262        1.77842
H          0.12389       -1.59008        1.76502
N         -0.97532        1.51392       -2.37664
H         -1.69444        1.06345       -1.77376
H         -0.12842        1.59364       -1.77544
C         -0.69506        0.69829       -3.57825
C         -1.42521        2.89128       -2.68538
N         -4.29530       -1.49754       -0.08239
H         -3.81168       -0.58949       -0.28807
C         -5.63285       -1.45711       -0.70401
C         -4.30529       -1.71921        1.38208
H         -3.67541       -2.18951       -0.54617
S         -3.15660        1.69337        0.58532
O         -2.48628        2.99344        0.36922
O         -4.52167        1.72075        1.07973
O         -3.02519        0.83611       -0.64779
O         -2.32515        0.92736        1.71951
H         -0.92341        3.43462        0.80219
H         -1.35510        0.99491        1.50892
H          0.58938       -3.41341        3.20562
H          2.28710       -2.85466        3.32255
H          1.64169       -3.40305        1.75560
H         -6.14898       -2.40150       -0.52410
H         -5.51573       -1.29784       -1.77598
H         -6.19338       -0.62894       -0.26818
H          5.51366        1.29543        1.78351
H          6.15160        2.39400        0.52953
H          6.19374        0.62049        0.27959
H         -1.66009        3.39481       -1.74872
H         -2.32029        2.84125       -3.30722
H         -0.62602        3.41459       -3.21174
H          3.27689        1.76132       -1.71459
H          4.81550        0.86196       -1.85047
H          4.83129        2.64200       -1.59637
H         -0.43049       -0.30776       -3.25956
H          0.12668        1.15558       -4.13158
H         -1.59002        0.67010       -4.20212
H         -4.81219       -0.87880        1.85800
H         -3.26924       -1.76964        1.71471
H         -4.81947       -2.65783        1.59656
H         -0.15546       -1.14341        4.11426
H          0.43123        0.31244        3.24945
H          1.56595       -0.67926        4.20793
