# Supplementary material for: Role of base strength, cluster structure and charge in sulfuric-acid-driven particle formation
Source: Copernicus journal article supplement (doi:10.5194/acp-19-9753-2019), 2019-08-02
Supplement: Supplementary file 1 [file acp-19-9753-2019-supplement.zip › Acid-Base-Ions_xyz/4A4D1P.xyz]

69
4A4D1P.log	Energy: -2096997.2829433
S         -2.11231       -2.01996        0.07305
O         -3.28583       -2.21345        0.93603
O         -2.44543       -1.16903       -1.11232
O         -1.77463       -3.46704       -0.46950
H         -4.49608       -1.10669        0.41786
H         -0.92646       -3.42923       -0.98096
S         -2.21014        1.99913       -0.41597
O         -1.37291        1.09205       -1.35819
O         -1.61548        3.32676       -0.48978
O         -2.01634        1.38291        1.01566
H         -1.71790        0.11739       -1.31615
N         -5.14973       -0.41633       -0.01497
C         -6.14495        0.03018        0.98530
H         -6.73342       -0.82795        1.31133
H         -6.79593        0.78074        0.53583
H         -5.61610        0.46095        1.83515
C         -5.72924       -1.02423       -1.23667
H         -6.31661       -1.89803       -0.95305
H         -4.90587       -1.32197       -1.88523
H         -6.36293       -0.29104       -1.73688
H         -1.04749        1.25116        1.23993
H         -4.56057        0.38809       -0.28949
O         -0.91224       -1.50466        0.75612
O         -3.63559        1.89579       -0.68110
S          1.81833        1.38524        1.14807
O          2.79620        0.33791        1.54281
O          1.68981        1.34310       -0.44582
O          2.29677        2.75321        1.38432
H          4.16788       -0.04219        0.44977
H          1.45867        3.90909        0.40550
S          1.54318       -2.14004       -1.55327
O          2.42084       -2.23607       -0.36633
O          0.59309       -3.24278       -1.71155
O          2.62627       -2.31029       -2.75759
H          1.30746        0.48912       -0.81101
N          4.60298       -0.61901       -0.29448
C          5.87412       -1.21416        0.17290
H          6.59582       -0.42020        0.36802
H          6.25820       -1.88474       -0.59637
H          5.68602       -1.77466        1.08839
C          4.71523        0.17095       -1.54388
H          5.43380        0.97778       -1.39423
H          3.73336        0.58228       -1.77681
H          5.04336       -0.48524       -2.34992
H          2.15379       -2.48580       -3.58405
H          3.87926       -1.36072       -0.42594
O          0.48684        1.08796        1.71234
O          0.95029       -0.80117       -1.72167
N          0.87791        4.48095       -0.24431
C          1.52364        4.50431       -1.57762
C          0.63111        5.81738        0.34542
H         -0.02590        3.97867       -0.32621
H          2.48835        5.00681       -1.49838
H          1.66124        3.47370       -1.90288
H          0.87964        5.03762       -2.27753
H          1.58188        6.33766        0.46538
H         -0.02619        6.38410       -0.31463
H          0.15493        5.68757        1.31681
N          1.13200       -1.89431        2.44977
H          1.86718       -1.26898        2.08488
H          0.34455       -1.80828        1.77042
C          1.59303       -3.30190        2.47611
C          0.66877       -1.38426        3.76220
H          0.76310       -3.93454        2.79294
H          1.91287       -3.57677        1.47212
H          2.41914       -3.39772        3.18253
H         -0.17537       -1.98931        4.09446
H          1.48451       -1.45153        4.48325
H          0.36132       -0.34779        3.63294
