# Supplementary material for: Role of base strength, cluster structure and charge in sulfuric-acid-driven particle formation
Source: Copernicus journal article supplement (doi:10.5194/acp-19-9753-2019), 2019-08-02
Supplement: Supplementary file 1 [file acp-19-9753-2019-supplement.zip › Acid-Base-Ions_xyz/4a4g.xyz]

64
4a4g.log	Energy: -2273010.9867663
C         -1.69412        0.27344        2.47945
N         -2.80245        0.20071        1.73823
H         -3.12556        1.02357        1.23540
H         -3.11244       -0.70563        1.39494
N         -1.15364       -0.83988        2.97941
H         -1.46481       -1.74514        2.63424
H         -0.23081       -0.79729        3.40493
N         -1.16388        1.46327        2.77250
H         -1.47869        2.28445        2.26175
H         -0.24174        1.50708        3.19902
C          1.73592        2.44807       -0.29932
N          1.22139        2.95815        0.82169
H          1.53915        2.60695        1.72233
H          0.30605        3.40064        0.79258
N          1.19395        2.75117       -1.48133
H          0.27935        3.19474       -1.51166
H          1.48684        2.23434       -2.30681
N          2.83111        1.68618       -0.24267
H          3.14802        1.33734        0.65915
H          3.13241        1.17714       -1.06995
C         -1.77740       -0.26679       -2.42164
N         -1.24947        0.84445       -2.93933
H         -0.34162        0.79819       -3.39557
H         -1.54508        1.75090       -2.58374
N         -2.85993       -0.18972       -1.64367
H         -3.15473        0.71787       -1.29033
H         -3.16914       -1.01139       -1.13029
N         -1.26215       -1.45873       -2.73256
H         -0.35490       -1.50612       -3.18955
H         -1.56305       -2.27880       -2.21175
C          1.73562       -2.45482        0.24133
N          1.23209       -2.75569        1.44077
H          1.55443       -2.24015        2.25602
H          0.31737       -3.19579        1.50165
N          1.18204       -2.96291       -0.86184
H          0.26659       -3.40210       -0.80212
H          1.47085       -2.61290       -1.77265
N          2.83122       -1.69716        0.14812
H          3.16220       -1.18953        0.96485
H          3.11930       -1.34969       -0.76383
S          2.50505        0.35933        3.39794
O          3.43531        0.26742        2.25196
O          1.71688        1.61036        3.37632
O          1.69802       -0.85079        3.60896
O          3.41605        0.41205        4.72763
H          3.98816        1.19109        4.68496
S          2.38863       -0.36873       -3.47973
O          3.35699       -0.28074       -2.36537
O          1.59668       -1.61664       -3.43206
O          1.57970        0.84457       -3.66340
O          3.25462       -0.42460       -4.83903
H          3.82459       -1.20604       -4.81565
S         -2.44730       -3.43494        0.40490
O         -1.63675       -3.40208        1.64133
O         -3.39539       -2.30226        0.33039
O         -1.65973       -3.63420       -0.81990
O         -3.33824       -4.77740        0.47408
H         -3.89631       -4.74296        1.26365
S         -2.44630        3.44431       -0.32303
O         -1.67729        3.40847       -1.58560
O         -3.39603        2.31560       -0.21720
O         -1.61766        3.64009        0.87497
O         -3.33343        4.79048       -0.36234
H         -3.91744        4.75864       -1.13303
