# Supplementary material for: Role of base strength, cluster structure and charge in sulfuric-acid-driven particle formation
Source: Copernicus journal article supplement (doi:10.5194/acp-19-9753-2019), 2019-08-02
Supplement: Supplementary file 1 [file acp-19-9753-2019-supplement.zip › Acid-Base-Ions_xyz/4a4g1p.xyz]

65
4a4g1p.log	Energy: -2273234.2680703
C         -4.07873        0.61588        0.55934
N         -3.24108        0.46574       -0.45841
N         -4.59315       -0.45322        1.17293
N         -4.43534        1.85148        0.93094
H         -2.93062       -0.44664       -0.77699
H         -2.77427        1.29155       -0.81918
H         -3.96038        2.63948        0.50141
H         -4.92865        2.00278        1.79465
H         -5.24816       -0.34913        1.92939
H         -4.18403       -1.36796        1.00137
C          0.17494        0.33487       -2.65401
N         -1.10140        0.73408       -2.80323
N          0.44859       -0.96406       -2.56901
N          1.14299        1.24510       -2.62943
H         -1.80436        0.04800       -3.03181
H          0.88538        2.22503       -2.60491
H          2.09411        0.97724       -2.38107
H         -0.32231       -1.58533       -2.34112
H          1.38552       -1.24989       -2.28938
S         -1.14918        3.74295       -0.72108
O         -0.39275        3.24145        0.46060
O         -0.42517        3.60379       -1.98905
O         -2.52163        3.21069       -0.77129
H         -1.29239        1.70998       -2.98516
O         -1.24594        5.31211       -0.39354
H         -1.52494        5.79211       -1.18754
C          2.61304        2.37518        1.68472
N          3.62070        1.65504        2.17872
N          2.35130        2.34627        0.38668
N          1.89975        3.18861        2.48377
H          3.93403        0.83494        1.65987
H          1.81379        2.95612        3.46033
H          1.12809        3.69731        2.07192
H          2.92348        1.78860       -0.24645
H          1.45677        2.70243        0.06834
S          3.94373       -0.71492       -0.90226
O          3.11201       -1.74371       -1.56182
O          3.88073       -0.75070        0.56845
O          5.47590       -1.08649       -1.19693
H          5.64482       -1.05868       -2.15018
O          3.71040        0.63082       -1.47024
H          3.84804        1.71433        3.15740
C          1.24730       -3.33606        1.20878
N          2.08036       -2.56908        1.91210
N          0.21559       -3.94417        1.81302
N          1.47020       -3.56101       -0.08235
H          1.81797       -2.27120        2.83849
H          2.18079       -3.02501       -0.57960
H          0.73567       -4.00322       -0.62008
H         -0.05847       -3.65510        2.73796
H         -0.49858       -4.36257        1.22859
S         -0.24297        0.00344        1.75400
O          0.83979        0.19074        2.69603
O          0.06334       -0.23602        0.35598
O         -1.12955       -1.16715        2.31955
H          2.76355       -1.98272        1.42986
O         -1.26742        1.20306        1.87489
H         -0.96092        1.98324        1.32579
S         -2.36295       -3.07727       -0.69564
O         -1.33357       -4.12011       -0.68167
O         -2.16349       -2.04177       -1.72802
O         -3.77011       -3.79194       -1.00654
H         -3.69320       -4.33198       -1.80705
O         -2.64957       -2.48270        0.63726
H         -1.66117       -1.62003        1.60255
