# Supplementary material for: Role of base strength, cluster structure and charge in sulfuric-acid-driven particle formation
Source: Copernicus journal article supplement (doi:10.5194/acp-19-9753-2019), 2019-08-02
Supplement: Supplementary file 1 [file acp-19-9753-2019-supplement.zip › Acid-Base-Ions_xyz/4a4n.xyz]

44
4a4n.log	Energy: -1899462.7076632
N          1.84191        2.85241       -0.26444
H          2.37200        2.11571       -0.76514
H          1.78748        2.57907        0.74394
H          2.29948        3.75355       -0.36506
H          0.88462        2.88217       -0.67112
N         -2.36091        0.64309        2.02229
H         -1.55968        0.48924        2.66719
H         -3.24677        0.63074        2.51937
H         -2.21862        1.55918        1.55272
H         -2.34304       -0.10879        1.30606
N         -0.42065       -0.22913       -1.84412
H         -0.35126        0.80387       -1.83883
H          0.51817       -0.66468       -1.81669
H         -0.95981       -0.52537       -1.00821
H         -0.94409       -0.54121       -2.65859
N          0.79058       -2.58941        0.75826
H          1.42240       -2.52547       -0.05565
H          0.00302       -3.24613        0.57846
H          1.31470       -2.82252        1.59900
H          0.40196       -1.63471        0.87332
S          3.21328       -0.64517       -1.16220
O          3.64487       -0.75421        0.23075
O          2.98066        0.71897       -1.66975
O          4.49058       -1.21274       -1.97079
O          2.07939       -1.54992       -1.50772
H          4.34604       -1.07306       -2.91681
S         -2.49945       -2.71750       -0.14618
O         -3.87590       -2.88043        0.27874
O         -1.59443       -3.85183        0.11735
O         -2.51791       -2.53428       -1.78219
O         -1.85165       -1.43137        0.24521
H         -3.14842       -3.16816       -2.14948
S         -1.88243        2.67774       -0.81200
O         -1.69991        2.98877        0.61024
O         -2.73442        1.52362       -1.10345
O         -2.62662        3.99783       -1.38057
O         -0.58681        2.59976       -1.55930
H         -2.92459        3.81924       -2.28293
S          1.07150        0.55083        2.24910
O          0.09201        0.33379        3.32024
O          1.76196        1.85092        2.27528
O          2.18138       -0.58606        2.51698
O          0.52098        0.24249        0.89777
H          2.83008       -0.55836        1.77480
