# Supplementary material for: Role of base strength, cluster structure and charge in sulfuric-acid-driven particle formation
Source: Copernicus journal article supplement (doi:10.5194/acp-19-9753-2019), 2019-08-02
Supplement: Supplementary file 1 [file acp-19-9753-2019-supplement.zip › Acid-Base-Ions_xyz/4a4n1p.xyz]

45
4a4n1p.log	Energy: -1899694.9224179
S          1.47938        2.19019        0.88871
O          1.88494        2.93387       -0.31822
O          0.40712        1.07141        0.43586
O          2.62917        1.43539        1.45408
O          0.70914        2.96429        1.86592
H          0.83700        0.40954       -0.15532
S          2.97307       -1.36970       -1.10752
O          1.56234       -0.92200       -0.96648
O          2.78058       -2.58812       -2.15525
O          3.84493       -0.38715       -1.76067
O          3.52651       -1.93823        0.12613
H          3.64355       -2.96977       -2.37391
S         -3.20148        0.85343       -1.64344
O         -2.98515        2.11223       -0.94995
O         -2.07110        0.15056       -2.20745
O         -4.04602       -0.10296       -0.74029
N         -1.95626        2.35297        1.72200
H         -2.57420        2.89835        2.31807
H         -1.99414        1.35310        1.98850
H         -0.96905        2.68753        1.80867
H         -2.26296        2.42104        0.74102
N          2.13984       -1.10014        2.38842
H          2.29499       -0.07970        2.23325
H          2.71264       -1.58992        1.67526
H          1.14564       -1.33088        2.21036
H          2.41064       -1.37630        3.32855
N         -0.69827       -2.26458       -1.76253
H         -1.12850       -1.58917       -2.40179
H         -1.34127       -2.35038       -0.95348
H         -0.54507       -3.16142       -2.21727
H          0.20819       -1.86518       -1.43456
N          4.40578        2.14114       -0.82543
H          5.01374        2.69447       -1.42451
H          4.28578        1.17672       -1.20304
H          4.78931        2.07934        0.11716
H          3.44567        2.56991       -0.73968
S         -1.80713       -1.63850        1.64343
O         -2.22026       -0.38839        2.28681
O         -2.27557       -2.83326        2.60551
O         -0.37373       -1.87383        1.48771
H         -3.18763       -2.68734        2.89759
O         -4.21130        1.11699       -2.83593
O         -2.51932       -1.85488        0.33873
H         -4.79462        1.86408       -2.63149
H         -3.46704       -0.79400       -0.27142
