# Supplementary material for: Role of base strength, cluster structure and charge in sulfuric-acid-driven particle formation
Source: Copernicus journal article supplement (doi:10.5194/acp-19-9753-2019), 2019-08-02
Supplement: Supplementary file 1 [file acp-19-9753-2019-supplement.zip › Acid-Base-Ions_xyz/4A5D1P.xyz]

79
4A5D1P.log	Energy: -2181837.4368021
S         -2.91006        2.13132       -0.36288
O         -2.42397        3.37461       -0.96236
O         -4.13150        2.27467        0.45381
O         -1.71019        1.72701        0.62759
H          0.69530        3.92461        0.30467
H         -1.83681        0.80337        0.95675
S         -2.45179       -1.86333        0.22381
O         -1.88575       -1.26351       -1.16287
O         -1.68334       -3.11724        0.36062
O         -3.89658       -2.06195        0.04572
H         -2.28413       -0.34725       -1.31834
N         -0.13975        4.49861        0.07833
C          0.27896        5.57218       -0.85034
H          1.02485        6.19719       -0.35861
H         -0.59336        6.16503       -1.12737
H          0.71395        5.11296       -1.73755
C         -0.73316        4.98698        1.34386
H          0.00897        5.57907        1.88029
H         -1.02615        4.12222        1.93833
H         -1.61216        5.59005        1.11461
H         -0.84807        3.90463       -0.39112
O         -3.05926        1.00260       -1.32580
O         -2.11891       -0.87165        1.27226
S          2.56530       -1.81307       -0.16235
O          4.01880       -1.95317       -0.00120
O          2.00179       -1.16514        1.20320
O          1.83693       -3.09665       -0.22559
H          5.05614       -0.56139       -0.16051
H         -0.51438       -3.07407        1.64265
S          2.81964        2.21781        0.21401
O          3.99805        2.36492       -0.66222
O          3.06230        1.15986        1.23796
O          1.59836        1.70238       -0.68969
H          2.36570       -0.22609        1.30579
N          5.69074        0.25911       -0.23353
C          6.65788        0.03615       -1.32970
H          7.27030       -0.83650       -1.09948
H          7.29031        0.91832       -1.43551
H          6.10592       -0.13406       -2.25379
C          6.30612        0.50304        1.09157
H          6.89196       -0.36964        1.38293
H          5.50261        0.68026        1.80608
H          6.94775        1.38285        1.03002
H          1.77354        0.78004       -0.99793
H          5.07582        1.07427       -0.46331
O          2.18261       -0.88533       -1.25181
O          2.30433        3.47333        0.76373
N          0.16971       -2.94563        2.41851
C          0.91900       -4.20580        2.63819
C         -0.54471       -2.44319        3.61626
H          0.82145       -2.22297        2.07201
H          0.21548       -4.99219        2.91376
H          1.43787       -4.45814        1.71427
H          1.64088       -4.05526        3.44189
H         -1.24070       -3.20988        3.95878
H          0.18124       -2.22377        4.40013
H         -1.09516       -1.54662        3.33361
N         -0.01816       -3.06827       -2.29294
H          0.66877       -3.14343       -1.51269
H         -0.68194       -2.33999       -1.98368
C          0.68479       -2.61753       -3.51792
C         -0.74501       -4.35155       -2.44358
H         -0.04628       -2.45734       -4.31130
H          1.21542       -1.69485       -3.28621
H          1.39667       -3.38708       -3.81880
H         -1.47129       -4.25653       -3.25176
H         -0.02788       -5.13846       -2.67980
H         -1.25695       -4.56437       -1.50594
N         -5.69432        0.05965        0.07263
C         -6.26563        0.19305       -1.28748
C         -6.69301       -0.16273        1.14031
H         -6.17245       -0.24892        2.09381
H         -7.24219       -1.08252        0.93551
H         -7.38052        0.68330        1.17089
H         -5.13818        0.92141        0.28028
H         -5.00969       -0.72307        0.07206
H         -5.44417        0.38001       -1.97865
H         -6.78588       -0.72848       -1.55161
H         -6.96028        1.03376       -1.30145
