# Supplementary material for: Role of base strength, cluster structure and charge in sulfuric-acid-driven particle formation
Source: Copernicus journal article supplement (doi:10.5194/acp-19-9753-2019), 2019-08-02
Supplement: Supplementary file 1 [file acp-19-9753-2019-supplement.zip › Acid-Base-Ions_xyz/4a5g1p.xyz]

74
4a5g1p.log	Energy: -2402126.7640239
C          5.65301       -0.77387        0.28569
N          6.57663       -0.55942        1.23322
N          4.37900       -0.50890        0.53120
N          6.00398       -1.25811       -0.90775
H          6.30532       -0.19980        2.13483
H          7.55035       -0.76243        1.08071
H          6.96181       -1.46016       -1.13966
H          5.27983       -1.39319       -1.60934
H          3.71785       -0.65694       -0.22851
H          4.05726       -0.10211        1.41491
C         -2.06137       -0.13260       -2.32113
N         -1.25997        0.88419       -2.64223
N         -3.32476        0.09266       -1.95818
N         -1.60082       -1.38260       -2.40693
H         -1.54213        1.84644       -2.46867
H         -0.62705       -1.53074       -2.63693
H         -2.15830       -2.16290       -2.06832
H         -3.59998        1.04232       -1.72037
H         -3.86078       -0.66233       -1.53643
S          2.63091       -0.35822       -2.85561
O          3.27861       -1.31826       -1.92596
O          1.20523       -0.63293       -3.07963
O          2.91718        1.04854       -2.52790
H         -0.29462        0.67707       -2.87102
O          3.41004       -0.69105       -4.22802
H          3.10247       -0.09952       -4.93015
C         -2.58702        0.41725        2.22623
N         -1.91177        1.52117        2.54971
N         -2.28894       -0.74159        2.83394
N         -3.55831        0.45971        1.32224
H         -1.00178        1.43059        2.99377
H         -3.68863        1.29246        0.74907
H         -4.05427       -0.38379        1.04428
H         -1.73265       -0.73471        3.67324
H         -2.77106       -1.59685        2.56693
S         -2.69651        3.69112       -0.57076
O         -1.76435        3.60142       -1.71813
O         -3.73001        2.63538       -0.61559
O         -2.01944        3.79664        0.73152
H         -2.08819        2.37867        2.02857
O         -3.45245        5.10018       -0.69098
H         -3.96227        5.12890       -1.51365
C          1.48741        2.86561       -0.06482
N          2.65812        2.24507        0.11611
N          1.06141        3.10679       -1.30551
N          0.78272        3.27971        0.98674
H          3.10914        1.82366       -0.68774
H          0.99493        2.89252        1.90041
H         -0.15596        3.65438        0.85073
H          1.58780        2.71836       -2.07704
H          0.11909        3.45945       -1.46889
S         -3.80862       -3.14234        0.13484
O         -3.11669       -3.13840        1.43586
O         -2.93382       -3.55974       -0.98607
O         -4.91205       -4.28991        0.32577
H         -5.49106       -4.31749       -0.44991
O         -4.52877       -1.88800       -0.16160
H          2.97507        2.01090        1.05063
C          0.43931       -3.07092        0.12073
N         -0.06943       -3.81209       -0.86945
N          1.73657       -2.72737        0.10063
N         -0.32527       -2.68935        1.13167
H          0.54454       -4.29104       -1.50740
H         -1.28919       -3.01012        1.22968
H          0.03089       -1.98913        1.77428
H          2.20211       -2.58928       -0.79111
H          2.05101       -2.13587        0.86279
S          1.94097        0.31783        3.13817
O          3.24777        0.86125        2.68876
O          0.93191        1.37952        3.29605
O          1.50724       -0.84285        2.35176
H         -1.07191       -3.99633       -0.90103
O          2.17961       -0.31358        4.60222
H          2.37011        0.39694        5.23230
