# Supplementary material for: Role of base strength, cluster structure and charge in sulfuric-acid-driven particle formation
Source: Copernicus journal article supplement (doi:10.5194/acp-19-9753-2019), 2019-08-02
Supplement: Supplementary file 1 [file acp-19-9753-2019-supplement.zip › Acid-Base-Ions_xyz/4a5n1p.xyz]

49
4a5n1p.log	Energy: -1935216.4841750
N         -3.67861        2.15706       -0.91563
H         -4.41542        1.78096       -0.31863
H         -4.07794        2.74190       -1.64625
H         -3.00834        2.71350       -0.31809
H         -3.17318        1.34879       -1.32348
N         -1.24857        0.23467        2.52806
H         -0.58036       -0.45599        2.13677
H         -2.12366        0.13605        1.98378
H         -1.41710        0.07227        3.51731
H         -0.82393        1.17457        2.35800
N          3.92821       -3.09539       -0.09020
H          3.27123       -3.15513        0.72300
H          3.66337       -3.81668       -0.75964
H          3.79733       -2.15707       -0.54114
H          4.89431       -3.22489        0.20217
N          2.82734        3.55059        0.81395
H          3.33555        2.98186        0.10264
H          1.96448        3.95484        0.37944
H          2.49428        2.91411        1.54319
H          3.42213        4.27505        1.20831
N         -0.09984       -1.26960       -2.37306
H          0.17765       -2.05215       -1.74349
H         -0.04886       -1.56453       -3.34490
H         -1.06416       -0.96562       -2.14228
H          0.56369       -0.48637       -2.19958
S         -3.19788       -1.16678       -0.39843
O         -2.72220       -0.45152       -1.61569
O         -2.43529       -2.39805       -0.15641
O         -3.36583       -0.25578        0.74270
O         -4.71500       -1.61054       -0.70005
H         -4.72351       -2.37292       -1.29708
S          0.73864       -2.65179        0.85940
O          0.46379       -1.17501        0.90597
O          0.88262       -3.10383       -0.53976
O          1.86119       -3.04875        1.71517
O         -0.53960       -3.32865        1.49869
H         -1.33024       -3.08058        0.95795
S         -0.52134        3.05248        0.46632
O          0.11360        2.46350        1.67380
O         -1.92884        3.43216        0.67712
O          0.33262        4.08038       -0.14745
O         -0.67227        1.85304       -0.59700
H          0.21361        1.56866       -0.94604
S          2.83516        0.56885       -0.93186
O          1.53899        0.84021       -1.62743
O          3.36502       -0.74627       -1.33004
O          3.77983        1.68229       -1.00364
O          2.47808        0.50562        0.63118
H          1.72233       -0.12630        0.78193
