# Supplementary material for: Role of base strength, cluster structure and charge in sulfuric-acid-driven particle formation
Source: Copernicus journal article supplement (doi:10.5194/acp-19-9753-2019), 2019-08-02
Supplement: Supplementary file 1 [file acp-19-9753-2019-supplement.zip › Acid-Base-Ions_xyz/4D.xyz]

40
4D.log	Energy: -339219.2759914
N         -1.00242        1.79381       -0.42657
H         -1.37401        0.84766       -0.28175
H          0.84838        1.37469        0.28065
N          1.79428        1.00270        0.42607
C          2.76803        1.93152       -0.11997
C          2.00142        0.73230        1.83818
C         -0.73179        2.00206       -1.83847
C         -1.93191        2.76666        0.11996
H         -2.15013        2.51762        1.16244
H         -2.88834        2.81606       -0.43008
H         -1.48390        3.76716        0.09933
H         -0.24155        2.97196       -1.98583
H         -1.63841        1.98551       -2.46839
H         -0.04906        1.22534       -2.19748
H          2.97089        0.24148        1.98636
H          1.98498        1.63909        2.46787
H          1.22400        0.05017        2.19685
H          2.81764        2.88801        0.42993
H          3.76825        1.48290       -0.09858
H          2.51988        2.14973       -1.16267
N          1.00279       -1.79417       -0.42569
H          1.37476       -0.84817       -0.28094
C          0.73122       -2.00200       -1.83748
C          1.93222       -2.76753        0.11997
H          0.04863       -1.22488       -2.19593
H          1.63747       -1.98569       -2.46794
H          0.24046       -2.97164       -1.98476
H          1.48377       -3.76784        0.09929
H          2.88828       -2.81718       -0.43068
H          2.15123       -2.51895        1.16241
N         -1.79380       -1.00257        0.42642
H         -0.84768       -1.37455        0.28266
C         -2.00317       -0.73093        1.83797
C         -2.76664       -1.93192       -0.12036
H         -2.81697       -2.88799        0.43022
H         -3.76694       -1.48340       -0.10078
H         -2.51692       -2.15091       -1.16251
H         -1.98757       -1.63714        2.46850
H         -2.97294       -0.24012        1.98421
H         -1.22642       -0.04831        2.19720
