# Supplementary material for: Role of base strength, cluster structure and charge in sulfuric-acid-driven particle formation
Source: Copernicus journal article supplement (doi:10.5194/acp-19-9753-2019), 2019-08-02
Supplement: Supplementary file 1 [file acp-19-9753-2019-supplement.zip › Acid-Base-Ions_xyz/4D1P.xyz]

41
4D1P.log	Energy: -339487.0758054
N         -3.56019        0.45184       -0.00186
H         -3.87310        1.25530        0.53400
C         -3.78191        0.71475       -1.42344
H         -3.26597        1.63306       -1.71546
H         -3.36793       -0.11118       -2.01141
H         -4.84550        0.81231       -1.68504
C         -4.28102       -0.73438        0.46104
H         -3.87089       -1.62094       -0.03498
H         -4.14279       -0.85407        1.53847
H         -5.35871       -0.69776        0.24660
N         -0.79413       -0.60049        0.26666
H         -1.70430       -0.11205        0.21359
C         -0.62404       -1.38155       -0.95983
H         -0.67519       -0.71931       -1.82843
H          0.35420       -1.87532       -0.95828
H         -1.39026       -2.16075       -1.07175
C         -0.79615       -1.44405        1.46444
H          0.18996       -1.90055        1.60485
H         -1.02088       -0.83282        2.34225
H         -1.53730       -2.25237        1.40604
N          3.53112       -0.20496       -0.25655
H          4.41741        0.24311       -0.04221
C          3.43841       -1.45714        0.50042
H          3.57570       -1.25652        1.56563
H          2.44253       -1.89002        0.35677
H          4.17953       -2.20247        0.18410
C          3.44721       -0.42005       -1.70500
H          2.45122       -0.80087       -1.95479
H          3.59452        0.52782       -2.22779
H          4.18776       -1.14280       -2.07117
C          0.95463        2.28275       -0.54855
N          1.21409        1.21956        0.44182
C          1.28202        1.70530        1.83413
H          0.40924        0.47932        0.36998
H          1.74391        3.03602       -0.50797
H          0.92738        1.83897       -1.54487
H         -0.00756        2.75337       -0.33683
H          2.07586        2.44795        1.93572
H          0.32694        2.15560        2.11184
H          1.48769        0.86109        2.49382
H          2.12532        0.73034        0.19764
