# Supplementary material for: Role of base strength, cluster structure and charge in sulfuric-acid-driven particle formation
Source: Copernicus journal article supplement (doi:10.5194/acp-19-9753-2019), 2019-08-02
Supplement: Supplementary file 1 [file acp-19-9753-2019-supplement.zip › Acid-Base-Ions_xyz/4g.xyz]

36
4g.log	Energy: -515434.1919456
C         -0.53116        2.43892        0.33816
N         -1.73288        2.59307        0.80517
N          0.63455        2.87971        0.93332
N         -0.32895        1.71074       -0.79707
H         -1.73585        3.13095        1.66601
H         -1.13811        1.49421       -1.35700
H          0.60206        1.69957       -1.20282
H          0.54063        3.63003        1.59891
H          1.47019        2.89782        0.34183
C          2.92497        0.57595       -0.33508
N          2.70088        1.74438       -0.87437
N          3.59211       -0.47169       -0.92046
N          2.50532        0.32365        0.93889
H          3.15349        1.82418       -1.78045
H          1.84087        0.98163        1.32338
H          2.38987       -0.65107        1.19167
H          3.78256       -0.39776       -1.90643
H          3.36882       -1.40913       -0.57170
C         -3.12236       -0.51080       -0.18861
N         -2.22675       -0.77919        0.70537
N         -3.48779        0.74778       -0.59869
N         -3.77064       -1.54384       -0.83831
H         -1.93663        0.07763        1.17446
H         -3.37966       -2.45336       -0.64020
H         -3.99136       -1.39446       -1.81168
H         -3.09161        1.52756       -0.05401
H         -4.43274        0.86446       -0.93229
C          0.78461       -2.45499        0.26009
N          2.05705       -2.71103        0.36192
N         -0.22042       -2.97496        1.03976
N          0.33748       -1.61999       -0.73212
H          2.23741       -3.41729        1.06984
H          1.06850       -1.11138       -1.20457
H         -0.49134       -1.07699       -0.50485
H          0.06668       -3.38346        1.91488
H         -1.07994       -2.41801        1.07367
