# Supplementary material for: Role of base strength, cluster structure and charge in sulfuric-acid-driven particle formation
Source: Copernicus journal article supplement (doi:10.5194/acp-19-9753-2019), 2019-08-02
Supplement: Supplementary file 1 [file acp-19-9753-2019-supplement.zip › Acid-Base-Ions_xyz/4g1p.xyz]

37
4g1p.log	Energy: -515705.5171680
C         -4.29749       -0.53722        0.11208
N         -5.61566       -0.59566        0.47819
N         -3.29045       -0.38378        0.91694
N         -4.07601       -0.65115       -1.23588
H         -5.83285       -0.64014        1.46063
H         -6.26911       -1.06881       -0.12668
H         -4.79577       -0.34033       -1.86970
H         -3.13155       -0.47030       -1.53861
H          0.03839       -2.03275       -0.09606
H         -3.57764       -0.41579        1.89061
C         -0.07695       -0.01341       -0.11684
N         -0.54769       -1.23454        0.14702
N         -0.83523        1.06071        0.11649
N          1.16676        0.13453       -0.58442
H         -1.50613       -1.31159        0.48587
H          1.67634       -0.71223       -0.84017
H          1.45812        1.07211       -0.85675
H         -1.78741        0.90365        0.44934
H         -0.46960        1.96945       -0.17316
C          1.68544        3.88142       -0.03438
N          1.04878        3.10740       -0.85915
N          2.10945        5.15678       -0.29489
N          1.98097        3.42925        1.22679
H          0.97447        3.52037       -1.78403
H          1.54026        2.55985        1.48553
H          2.05222        4.10610        1.97090
H          2.03386        5.49809       -1.23941
H          2.87867        5.53383        0.23688
C          2.65694       -3.33381       -0.01774
N          1.82346       -2.74229       -0.81825
N          3.48730       -4.37138       -0.34760
N          2.75686       -2.91702        1.28428
H          1.77034       -3.20867       -1.71895
H          2.26066       -2.06831        1.50754
H          3.63678       -3.03728        1.76142
H          3.37385       -4.79970       -1.25205
H          3.80863       -4.98930        0.38155
