# Supplementary material for: Role of base strength, cluster structure and charge in sulfuric-acid-driven particle formation
Source: Copernicus journal article supplement (doi:10.5194/acp-19-9753-2019), 2019-08-02
Supplement: Supplementary file 1 [file acp-19-9753-2019-supplement.zip › Acid-Base-Ions_xyz/4n.xyz]

16
4n.log	Energy: -141955.8807858
N          2.17137        0.14703       -0.14834
N          0.14703       -2.17056        0.14809
H          0.25527       -2.61521        1.05390
H          0.89926       -1.47726        0.04750
H          0.28803       -2.88896       -0.55461
H          1.47811        0.89960       -0.05028
H          2.88711        0.28769        0.55713
H          2.61960        0.25486       -1.05242
N         -0.14726        2.17065        0.14813
H         -0.25244        2.61880        1.05259
H         -0.90004        1.47724        0.05241
H         -0.29065        2.88647       -0.55673
N         -2.17119       -0.14719       -0.14792
H         -2.61611       -0.25238       -1.05397
H         -2.88949       -0.29025        0.55447
H         -1.47821       -0.90003       -0.04971
