# Supplementary material for: Role of base strength, cluster structure and charge in sulfuric-acid-driven particle formation
Source: Copernicus journal article supplement (doi:10.5194/acp-19-9753-2019), 2019-08-02
Supplement: Supplementary file 1 [file acp-19-9753-2019-supplement.zip › Acid-Base-Ions_xyz/4n1p.xyz]

17
4n1p.log	Energy: -142275.3553946
N         -0.00004        0.00029        0.95828
H          0.82154        0.54932        0.59365
H         -0.00051       -0.00001        1.98171
H         -0.88617        0.43712        0.59311
H          0.06480       -0.98559        0.59303
N          2.14424        1.43260       -0.28247
H          1.93684        1.27993       -1.27243
H          3.08502        1.07512       -0.11189
H          2.15735        2.44164       -0.12863
N         -2.31339        1.13963       -0.28260
H         -2.07962        1.03397       -1.27279
H         -2.47219        2.13372       -0.11366
H         -3.19412        0.64804       -0.12570
N          0.16928       -2.57244       -0.28243
H          0.16171       -2.31606       -1.27265
H         -0.62204       -3.19810       -0.12618
H          1.02680       -3.09962       -0.11304
