# Supplementary material for: Role of base strength, cluster structure and charge in sulfuric-acid-driven particle formation
Source: Copernicus journal article supplement (doi:10.5194/acp-19-9753-2019), 2019-08-02
Supplement: Supplementary file 1 [file acp-19-9753-2019-supplement.zip › Acid-Base-Ions_xyz/5g1p.xyz]

46
5g1p.log	Energy: -644568.7073695
C         -1.51680        0.03553        2.07410
N         -0.67632        0.82221        1.40199
N         -1.15582       -1.19209        2.44252
N         -2.71459        0.53634        2.40873
H          0.14975        0.42659        0.95324
H         -1.06335        1.70304        1.05493
H         -2.98407        1.42720        1.98353
H         -3.38257       -0.00981        2.92450
H         -1.85180       -1.80925        2.82840
H         -0.29971       -1.62937        2.04106
C         -1.56378       -2.47528       -1.46476
N         -1.19061       -1.22889       -1.45359
N         -2.24341       -3.08065       -2.49456
N         -1.27999       -3.28431       -0.39960
H         -1.44339       -0.76401       -2.32201
H         -0.50152       -2.97456        0.19145
H         -1.28333       -4.27829       -0.57298
H         -2.63544       -2.50006       -3.21716
H         -2.72876       -3.94788       -2.32815
C         -3.30913        2.48698       -0.53094
N         -2.68396        2.78618        0.56848
N         -4.22077        3.28865       -1.17060
N         -3.10182        1.27969       -1.13826
H         -2.81715        3.75852        0.82897
H         -2.45889        0.61924       -0.71507
H         -3.86485        0.87058       -1.65363
H         -4.36320        4.21928       -0.81218
H         -4.32786        3.19417       -2.16885
C          4.49758        1.50804       -0.61753
N          4.10705        0.42466       -1.21259
N          5.11394        2.58121       -1.21619
N          4.29211        1.65802        0.72905
H          4.42955        0.37846       -2.17408
H          3.76603        0.92505        1.18264
H          4.16462        2.58672        1.09842
H          5.40076        2.47157       -2.17594
H          5.73999        3.13871       -0.65462
C          1.92701       -1.59855        0.60392
N          1.09970       -2.39662        1.22745
N          3.28013       -1.57375        0.76902
N          1.42426       -0.62574       -0.22222
H          1.59469       -3.06949        1.80564
H          0.53590       -0.85617       -0.69380
H          2.12390       -0.15182       -0.79456
H          3.71253       -2.32394        1.28329
H          3.82940       -1.10911        0.04081
