# Supplementary material for: Role of base strength, cluster structure and charge in sulfuric-acid-driven particle formation
Source: Copernicus journal article supplement (doi:10.5194/acp-19-9753-2019), 2019-08-02
Supplement: Supplementary file 1 [file acp-19-9753-2019-supplement.zip › Acid-Base-Ions_xyz/5n1p.xyz]

21
5n1p.log	Energy: -177716.7714032
N          1.69568        1.90409        1.46100
H          2.45145        1.44365        1.96095
H          1.17330        2.43423        2.15325
H          2.13089        2.58529        0.84480
N         -1.45348       -1.68855        1.91593
H         -1.98111       -2.42637        1.45724
H         -2.12110       -1.15820        2.46923
H         -0.83164       -2.14702        2.57642
N         -1.92384        1.47569       -1.66024
H         -2.46278        2.14809       -1.12121
H         -2.59700        0.86141       -2.11041
H         -1.47006        1.99980       -2.40358
N          1.68161       -1.69128       -1.71659
H          1.13126       -2.29126       -2.32509
H          2.28832       -2.30470       -1.17922
H          2.28801       -1.14502       -2.32243
N          0.00005        0.00005       -0.00006
H          0.60305        0.67740        0.51966
H         -0.51668       -0.60070        0.68159
H         -0.68431        0.52477       -0.59064
H          0.59824       -0.60134       -0.61082
