# Supplementary material for: Role of base strength, cluster structure and charge in sulfuric-acid-driven particle formation
Source: Copernicus journal article supplement (doi:10.5194/acp-19-9753-2019), 2019-08-02
Supplement: Supplementary file 1 [file acp-19-9753-2019-supplement.zip › Acid-Base-Ions_xyz/SupportingInfo-Acid-Base-Ions.pdf]

Supporting Information

for

Role of Base Strength, Cluster Structure and  
Charge in Sulfuric Acid-Driven Particle  
Formation

Nanna Myllys,<sup>\*,†,‡,||</sup> Jakub Kubečka,<sup>‡</sup> Vitus Besel,<sup>‡</sup> Dina Alfaouri,<sup>‡</sup> Tinja Olenius,<sup>¶</sup>  
James Smith,<sup>†</sup> and Monica Passananti<sup>§,‡</sup>

<sup>†</sup>*Department of Chemistry, University of California, Irvine*

<sup>‡</sup>*Institute for Atmospheric and Earth System Research, University of Helsinki*

<sup>¶</sup>*Department of Environmental Science and Analytical Chemistry & Bolin Centre for  
Climate Research, Stockholm University*

<sup>§</sup>*Dipartimento di Chimica, Università di Torino*

<sup>||</sup>*+358 503812141*

E-mail: [nanna.myllys@uci.edu](mailto:nanna.myllys@uci.edu)

## Cluster Structures and Gibbs Free Binding Energies

As stated in the main text, we have used cluster structures of our previous works as a base of our study.<sup>1-3</sup> For cluster structures not studied before, we have performed a new configurational sampling procedure, explained below. In addition, if some previously found cluster structures seemed to be outlying from the general trends, we have re-sampled them to find a better configuration.

First, we used a recently introduced genetic algorithm, the Artificial Bee Colony (ABC) algorithm,<sup>4</sup> to explore the Potential Energy Surface (PES) of the desired molecular cluster. We utilized the ABCcluster program,<sup>5,6</sup> which uses ABC to explore the PES of clusters composed of rigid molecular units. Assuming rigidity of molecules is no problem since the molecular clusters will be optimized in the further steps. Thus, assuming all possible combinations of molecular units (isomers and protonation states) we explored the PES on the Molecular Mechanics (MM) level with Force Field (FF) parameters taken from the CHARMM database.<sup>7,8</sup> We used the following ABCcluster specification: 2000 initial random guesses, 100 generations (exploration loops) and 5 scout bees, and saved 5000 energetically lowest-lying local minima for each combination of molecular units.

Second, all structures found by ABCcluster were re-optimized by the tight-binding semi-empirical program GFN-*x*TB with very tight optimization criteria.<sup>9</sup> Many of the structures relaxed to the same minimum on the PES. Thus, we removed all redundant structures based on the total GFN-*x*TB energy and the radius of gyration (a geometry property incorporating cluster size and mass distribution). Two structures were combined if the total GFN-*x*TB energy difference was lower than 0.001 Hartree and the gyration radius difference was lower than 0.01 Ångström. We also removed energetically high-lying local minima, if the relative total GFN-*x*TB energy with respect to the energetically lowest-lying structure was higher than  $5 \times N$  kcal/mol, where  $N$  is the number of molecules in the cluster.

The next step was optimization at the  $\omega$ B97X-D/6-31++g\*\* level of theory<sup>10</sup> with very tight optimization criteria. However, not all structures from the GFN-*x*TB step were used

due to a large amount of minima configurations remaining that fulfilled all above listed conditions. First, we did a uniform sampling/selection of 50 structures based on their GFN- $x$ TB energy and radius of gyration. Second, after optimization of these 50 structures on DFT level of theory, we re-selected another 50 structures from the GFN- $x$ TB step around the structures chosen in the primary selection. This set formed the lowest-lying structures on DFT level of theory. Thus, we selected overall 100 structures after the GFN- $x$ TB step.

Finally, for few energetically lowest-lying cluster structures ( $0-2N$  kcal/mol, where  $N$  is the number of molecules in the cluster), we performed vibrational frequency analysis to obtain thermal corrections for the free energies. On top of the 2-5 lowest DFT free energy structures, we calculated the single point electronic energy corrections using DLPNO-CCSD(T)/aug-cc-pVTZ level of theory. The DLPNO single point energy and the DFT thermal correction were used to calculate the Gibbs free energy of the cluster. The Gibbs free binding energies for the global minimum energy clusters are calculated as:

$$\Delta G = G_{\text{cluster}} - \sum_i G_{\text{monomers},i}. \quad (1)$$

As mentioned, the Gibbs free binding energy is a sum of the DLPNO binding energy ( $\Delta E$ ) and the DFT thermal contribution ( $\Delta G_{\text{Thermal}}$ ), calculated as

$$\Delta G = \Delta E + \Delta G_{\text{Thermal}}. \quad (2)$$

Table S1 presents  $\Delta E$ ,  $\Delta G_{\text{Thermal}}$  and  $\Delta G$ . The compounds are referred to as follows: A=sulfuric acid, N=ammonia, D=dimethylamine, G=guanidine, B=bisulfate and P=proton. The corresponding cluster structures in xyz format are found in the supplementary zip folder.

**Table S1:** Binding energies ( $\Delta E$ , DLPNO), thermal contributions to the Gibbs free energy ( $\Delta G_{\text{Thermal}}$ , DFT) and Gibbs free binding energies ( $\Delta G$ , DLPNO//DFT). All values are in kcal/mol,  $\Delta G_{\text{Thermal}}$  and  $\Delta G$  are calculated at 298.15 using RRHO approximation.

| Cluster | $\Delta E$ | $\Delta G_{\text{Thermal}}$ | $\Delta G$ |
|---------|------------|-----------------------------|------------|
| 1A1N    | -16.433    | 9.674                       | -6.759     |
| 1A2N    | -31.280    | 19.711                      | -11.569    |
| 1A3N    | -43.184    | 33.445                      | -9.739     |
| 1A4N    | -55.680    | 45.252                      | -10.427    |
| 2A1N    | -46.742    | 25.380                      | -21.362    |
| 2A2N    | -66.389    | 37.463                      | -28.926    |
| 2A3N    | -82.373    | 50.157                      | -32.216    |
| 2A4N    | -95.896    | 61.380                      | -34.515    |
| 3A1N    | -67.730    | 37.106                      | -30.625    |
| 3A2N    | -94.650    | 50.837                      | -43.813    |
| 3A3N    | -119.675   | 63.878                      | -55.798    |
| 3A4N    | -139.217   | 79.208                      | -60.009    |
| 4A1N    | -89.101    | 51.613                      | -37.488    |
| 4A2N    | -121.308   | 67.715                      | -53.593    |
| 4A3N    | -147.440   | 79.872                      | -67.568    |
| 4A4N    | -173.116   | 89.714                      | -83.402    |
| 2N      | -3.187     | 6.934                       | 3.747      |
| 3N      | -10.703    | 19.198                      | 8.495      |
| 4N      | -16.595    | 29.850                      | 13.254     |
| 1B1N    | -10.519    | 11.742                      | 1.224      |
| 1B2N    | -18.836    | 20.001                      | 1.165      |
| 1A1B1N  | -59.246    | 27.076                      | -32.170    |
| 1A1B2N  | -69.183    | 38.538                      | -30.645    |
| 2A1B1N  | -97.249    | 41.036                      | -56.213    |
| 2A1B2N  | -114.240   | 51.916                      | -62.324    |
| 2A1B3N  | -131.945   | 65.654                      | -66.325    |
| 3A1B1N  | -126.408   | 52.311                      | -74.098    |
| 3A1B2N  | -151.355   | 67.207                      | -84.148    |
| 3A1B3N  | -173.355   | 81.412                      | -91.942    |
| 3A1B4N  | -196.468   | 97.104                      | -99.232    |
| 4A1B1N  | -155.362   | 67.777                      | -87.585    |
| 4A1B2N  | -179.504   | 80.065                      | -99.439    |
| 4A1B3N  | -209.649   | 94.894                      | -114.756   |
| 4A1B4N  | -224.474   | 105.423                     | -119.051   |
| 1P2N    | -26.281    | 7.202                       | -19.079    |
| 1P3N    | -46.015    | 18.098                      | -27.917    |
| 1P4N    | -60.051    | 21.935                      | -32.830    |
| 1P5N    | -75.667    | 34.809                      | -40.858    |

|        |          |         |          |
|--------|----------|---------|----------|
| 1A1P1N | -21.279  | 5.914   | -15.365  |
| 1A1P2N | -55.088  | 19.524  | -35.564  |
| 1A1P3N | -74.080  | 30.104  | -43.975  |
| 1A1P4N | -90.996  | 39.969  | -51.027  |
| 1A1P5N | -108.197 | 51.044  | -56.952  |
| 2A1P1N | -47.851  | 20.672  | -27.180  |
| 2A1P2N | -82.511  | 33.532  | -48.978  |
| 2A1P3N | -115.137 | 47.440  | -67.697  |
| 2A1P4N | -132.884 | 56.720  | -76.164  |
| 2A1P5N | -150.004 | 65.851  | -84.153  |
| 3A1P3N | -138.154 | 59.693  | -78.461  |
| 3A1P4N | -168.922 | 73.662  | -95.260  |
| 3A1P5N | -187.215 | 85.253  | -101.962 |
| 4A1P4N | -192.803 | 86.155  | -106.648 |
| 4A1P5N | -228.170 | 101.998 | -126.172 |
| 1A1D   | -24.819  | 11.284  | -13.535  |
| 1A2D   | -40.462  | 23.234  | -17.227  |
| 1A3D   | -57.275  | 36.394  | -20.881  |
| 1A4D   | -71.532  | 50.226  | -21.306  |
| 2A1D   | -58.921  | 26.287  | -32.634  |
| 2A2D   | -90.137  | 41.564  | -48.574  |
| 2A3D   | -111.094 | 55.169  | -55.925  |
| 2A4D   | -126.846 | 66.712  | -60.134  |
| 3A1D   | -84.855  | 40.667  | -44.188  |
| 3A2D   | -120.432 | 55.775  | -64.657  |
| 3A3D   | -154.415 | 71.166  | -83.249  |
| 3A4D   | -178.359 | 85.309  | -93.051  |
| 4A1D   | -105.456 | 54.449  | -51.007  |
| 4A2D   | -144.846 | 69.843  | -75.004  |
| 4A3D   | -179.242 | 83.415  | -95.827  |
| 4A4D   | -213.369 | 97.940  | -115.429 |
| 2D     | -5.042   | 9.366   | 4.324    |
| 3D     | -14.493  | 20.991  | 6.498    |
| 4D     | -23.794  | 29.633  | 5.839    |
| 1B1D   | -13.207  | 12.991  | -0.216   |
| 1B2D   | -24.328  | 23.172  | -1.156   |
| 1A1B1D | -70.197  | 28.490  | -41.707  |
| 1A1B2D | -84.320  | 41.011  | -43.309  |
| 2A1B1D | -106.951 | 41.579  | -65.371  |
| 2A1B2D | -133.061 | 56.689  | -76.372  |
| 2A1B3D | -154.180 | 70.495  | -83.686  |
| 3A1B1D | -134.801 | 54.872  | -79.929  |
| 3A1B2D | -170.166 | 70.638  | -99.528  |
| 3A1B3D | -195.297 | 83.973  | -111.324 |
| 3A1B4D | -219.245 | 101.100 | -118.145 |

|        |          |         |          |
|--------|----------|---------|----------|
| 4A1B1D | -162.690 | 68.157  | -94.534  |
| 4A1B2D | -207.598 | 86.072  | -121.527 |
| 4A1B3D | -241.279 | 101.698 | -139.580 |
| 4A1B4D | -273.940 | 118.960 | -154.980 |
| 1P2D   | -24.908  | 9.182   | -15.726  |
| 1P3D   | -44.506  | 20.311  | -24.195  |
| 1P4D   | -56.313  | 31.010  | -25.304  |
| 1P5D   | -67.728  | 44.177  | -23.551  |
| 1A1P1D | -19.343  | 8.990   | -10.354  |
| 1A1P2D | -63.088  | 22.505  | -40.583  |
| 1A1P3D | -92.305  | 37.373  | -54.932  |
| 1A1P4D | -111.390 | 49.229  | -61.934  |
| 1A1P5D | -129.838 | 61.392  | -68.446  |
| 2A1P1D | -39.520  | 21.241  | -18.279  |
| 2A1P2D | -91.584  | 35.393  | -56.191  |
| 2A1P3D | -133.102 | 50.947  | -82.155  |
| 2A1P4D | -162.995 | 65.504  | -97.491  |
| 2A1P5D | -185.235 | 79.626  | -105.609 |
| 3A1P3D | -157.622 | 65.200  | -92.422  |
| 3A1P4D | -199.011 | 80.104  | -118.907 |
| 3A1P5D | -230.617 | 97.488  | -133.130 |
| 4A1P4D | -223.576 | 93.344  | -130.233 |
| 4A1P5D | -263.655 | 107.864 | -155.790 |
| 1A1G   | -30.345  | 10.044  | -20.302  |
| 1A2G   | -52.747  | 23.937  | -28.809  |
| 1A3G   | -76.585  | 38.060  | -38.525  |
| 1A4G   | -97.699  | 51.765  | -45.934  |
| 2A1G   | -65.589  | 27.227  | -38.362  |
| 2A2G   | -106.176 | 37.930  | -68.247  |
| 2A3G   | -129.138 | 55.360  | -73.778  |
| 2A4G   | -150.019 | 66.192  | -83.826  |
| 3A1G   | -91.208  | 39.927  | -51.281  |
| 3A2G   | -138.199 | 55.189  | -83.011  |
| 3A3G   | -178.926 | 67.737  | -111.189 |
| 3A4G   | -214.788 | 81.387  | -133.401 |
| 4A1G   | -113.420 | 53.471  | -59.948  |
| 4A2G   | -161.413 | 67.611  | -93.802  |
| 4A3G   | -213.363 | 82.747  | -130.616 |
| 4A4G   | -269.588 | 99.840  | -169.748 |
| 2G     | -13.567  | 11.328  | -2.239   |
| 3G     | -27.759  | 24.688  | -3.071   |
| 4G     | -49.213  | 38.883  | -10.330  |

|        |          |         |          |
|--------|----------|---------|----------|
| 1B1G   | -21.563  | 10.558  | -11.231  |
| 1B2G   | -44.943  | 27.296  | -17.217  |
| 1A1B1G | -71.817  | 21.375  | -50.441  |
| 1A1B2G | -117.100 | 42.689  | -58.651  |
| 2A1B1G | -150.481 | 56.253  | -74.411  |
| 2A1B2G | -178.731 | 69.906  | -104.285 |
| 2A1B3G | -99.152  | 40.500  | -111.669 |
| 3A1B1G | -158.606 | 54.321  | -94.229  |
| 3A1B2G | -197.222 | 73.133  | -124.089 |
| 3A1B3G | -223.469 | 85.811  | -150.197 |
| 3A1B4G | -184.365 | 72.696  | -173.899 |
| 4A1B1G | -233.876 | 83.680  | -108.825 |
| 4A1B2G | -266.749 | 97.873  | -137.658 |
| 4A1B3G | -275.856 | 101.957 | -168.876 |
| 4A1B4G | -314.018 | 113.462 | -200.556 |
| 1P2G   | -28.627  | 9.909   | -18.336  |
| 1P3G   | -52.232  | 21.005  | -31.227  |
| 1P4G   | -72.036  | 31.573  | -40.463  |
| 1P5G   | -88.317  | 47.432  | -40.885  |
| 1A1P1G | -19.917  | 10.449  | -9.206   |
| 1A1P2G | -69.606  | 20.300  | -49.306  |
| 1A1P3G | -103.704 | 32.990  | -70.714  |
| 1A1P4G | -120.782 | 49.165  | -71.617  |
| 1A1P5G | -148.753 | 64.248  | -84.505  |
| 2A1P1G | -41.233  | 20.834  | -19.866  |
| 2A1P2G | -93.668  | 35.120  | -58.548  |
| 2A1P3G | -144.459 | 50.910  | -93.550  |
| 2A1P4G | -180.443 | 64.274  | -116.170 |
| 2A1P5G | -206.754 | 80.566  | -126.188 |
| 3A1P3G | -169.544 | 66.634  | -102.909 |
| 3A1P4G | -221.984 | 83.139  | -138.845 |
| 3A1P5G | -258.888 | 93.617  | -165.271 |
| 4A1P4G | -251.241 | 95.151  | -156.090 |
| 4A1P5G | -293.456 | 108.633 | -184.823 |
| 2A     | -18.958  | 11.410  | -7.547   |
| 3A     | -37.797  | 24.634  | -13.163  |
| 4A     | -56.320  | 34.358  | -21.962  |
| 1A1B   | -48.364  | 14.530  | -33.834  |
| 2A1B   | -78.291  | 27.099  | -51.192  |
| 3A1B   | -105.120 | 39.503  | -65.617  |
| 4A1B   | -124.215 | 52.852  | -71.363  |

---

## Evaporation Rates

The evaporation rates of the clusters are obtained from the Gibbs free binding energies  $\Delta G$  of the evaporating cluster and its products as

$$\gamma_{(i+j) \rightarrow i,j} = \beta_{i,j} \frac{p_{\text{ref}}}{k_B T} \exp \left( \frac{\Delta G_{i+j} - \Delta G_i - \Delta G_j}{k_B T} \right). \quad (3)$$

The collision coefficients for neutral-neutral collisions are computed from kinetic gas theory as

$$\beta_{i,j} = \left( \frac{3}{4\pi} \right)^{1/6} \left[ 6k_B T \left( \frac{1}{m_i} + \frac{1}{m_j} \right) \right]^{1/2} \left( V_i^{1/3} + V_j^{1/3} \right)^2, \quad (4)$$

where  $m_i$  and  $V_i$  are the mass and volume of cluster  $i$ , respectively. The volumes are calculated using bulk liquid densities (1830, 696, 680 and 1550  $\frac{\text{kg}}{\text{m}^3}$  for sulfuric acid, ammonia, dimethylamine and guanidine, respectively) assuming spherical clusters and ideal mixing.

In collisions between ions and neutral molecules or clusters, the collision cross section is larger than that predicted from the physical dimensions of the colliding systems due to their long-range attraction.<sup>11</sup> For the neutral-ion collision coefficients we have applied the approach by Su and Chesnavich,<sup>12</sup> who performed trajectory simulations of collisions between a point charge and a rigidly rotating molecule. The collision frequency is dependent on three reduced parameters:

$$\begin{aligned} \beta_{i,j}^L &= q_i \left( \frac{1}{m_i} + \frac{1}{m_j} \right)^{1/2} \left( \frac{\pi \alpha_j}{\epsilon_0} \right)^{1/2} \\ I^* &= \frac{\mu_j I}{\alpha_j q_i} \left( \frac{1}{m_i} + \frac{1}{m_j} \right) \\ x &= \frac{\mu_j}{(8\pi \epsilon_0 \alpha_j k_B T)^{1/2}} \end{aligned}$$

where  $q_i$  is the charge of the ion,  $\alpha_j$ ,  $\mu_j$ , and  $I$  are the polarizability, dipole moment, and moment of inertia of the neutral molecule, respectively, and  $\epsilon_0$  is the vacuum permittivity.

At low values of  $I^*$ , *i.e.* when  $I^* < \frac{0.7+x^2}{2+0.6x}$ , the collision rate was observed to be independent

of  $I^*$ , and a fit to the simulated data produced the parametrization

$$\beta_{i,j} = \begin{cases} \beta_{i,j}^L (0.4767x + 0.6200), & x \geq 2 \\ \beta_{i,j}^L \left( \frac{(x+0.5090)^2}{10.526} + 0.9754 \right), & x < 2. \end{cases} \quad (5)$$

The parametrization has been compared with experimental collision rates and was found to give a good correspondence.<sup>11</sup>

Figure S1 shows the evaporation rates of all studied clusters.

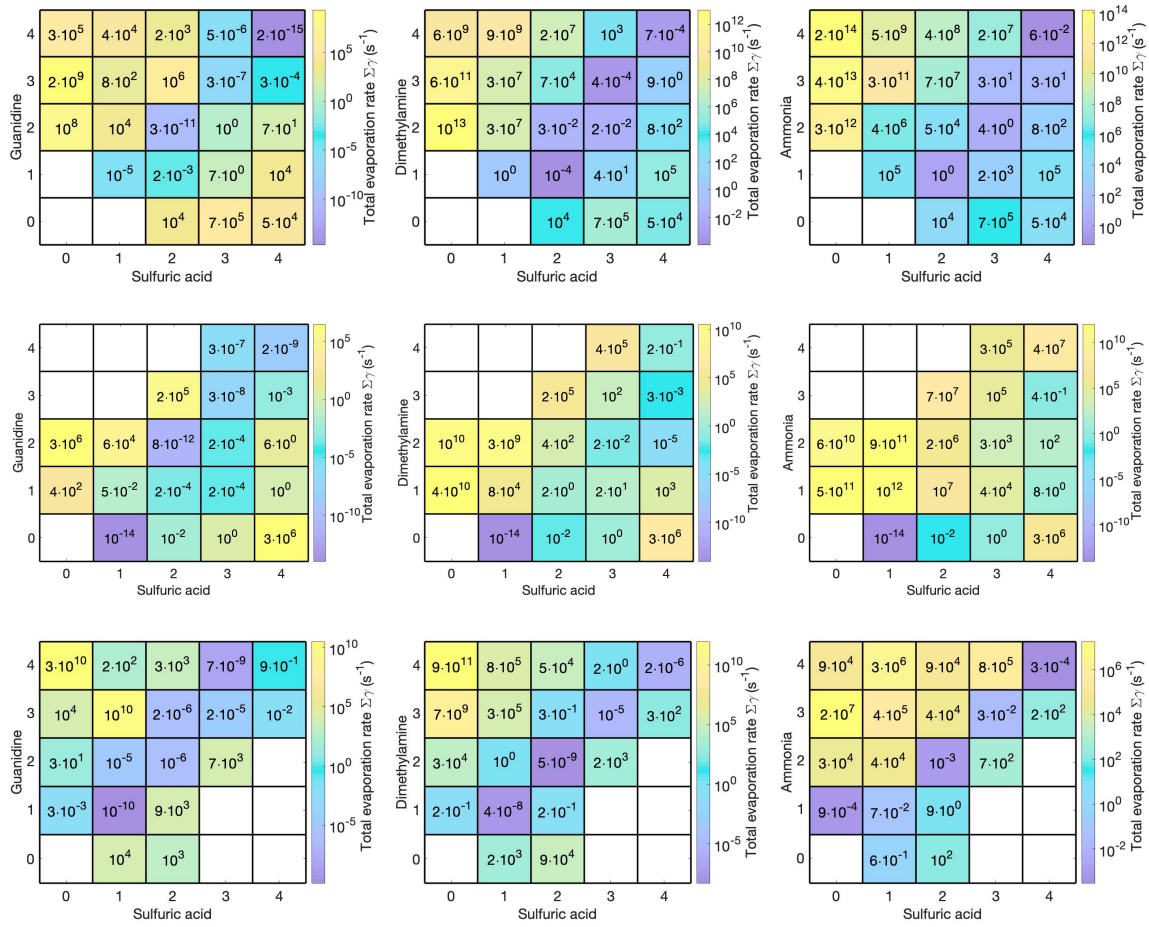

Figure S1: Evaporation rates of sulfuric acid clusters with guanidine (left), dimethylamine (middle) and ammonia (right). First row: neutral clusters, second row: anionic cluster (each cluster contains one bisulfate ion) and third row: cationic clusters (each cluster contains one protonated base).

## Cluster Population Dynamics Simulations

The time evolution and behavior of a population of clusters of different sizes and compositions is obtained by integrating the time derivatives of the cluster concentrations using the Atmospheric Cluster Dynamics Code.<sup>13</sup> These birth–death equations include all possible processes where the clusters can be formed or destroyed. For cluster  $i$  of a given composition, the time derivative is

$$\begin{aligned} \frac{dC_i}{dt} = & \frac{1}{2} \sum_{j < i} \beta_{j,(i-j)} C_j C_{(i-j)} + \sum_j \gamma_{(i+j) \rightarrow i,j} C_{(i+j)} - \sum_j \beta_{i,j} C_i C_j - \\ & \frac{1}{2} \sum_{j < i} \gamma_{i \rightarrow j,i-j} C_i + S_i - L_i C_i, \end{aligned} \quad (6)$$

where  $C_i$  is the concentration of cluster  $i$ ,  $\beta_{i,j}$  is the collision rate coefficient between  $i$  and  $j$ ,  $\gamma_{(i+j) \rightarrow i,j}$  is the evaporation rate coefficient of cluster  $(i+j)$ ,  $S_i$  is an external source term, and  $L_i$  is an external loss term corresponding to coagulation onto pre-existing surfaces. The loss rate  $L_i$  was assumed to depend on cluster size according to the parametrization by Lehtinen *et al.*<sup>14</sup> The reference loss rate, corresponding to a sulfuric acid molecule, was set to  $10^{-3} \text{ s}^{-1}$ , and the scavenging coefficient  $m$  to  $-1.6$  corresponding to typical atmospheric conditions. ACDC is available from the authors upon request.

## Boundary Conditions

By boundary conditions we refer to the smallest clusters outside of the simulation box which can be assumed to be stable (evaporation rate  $\ll 10^{-1} \text{ s}^{-1}$ ). This selection has been done based on the evaporation rates presented in Figure S1. The following boundary conditions are used in the particle formation simulations:

- Neutral sulfuric acid–guanidine: 5A4G and 4A5G
- Anionic sulfuric acid–guanidine: 5A1B4G and 4A1B5G
- Cationic sulfuric acid–guanidine: 5A5G1P and 4A6G1P
- Neutral sulfuric acid–dimethylamine: 5A4D

- Anionic sulfuric acid–dimethylamine: 5A1B4D
- Cationic sulfuric acid–dimethylamine: 4A6D1P
- Neutral sulfuric acid–ammonia: 5A4N
- Anionic sulfuric acid–dimethylamine: 5A1B3N
- Cationic sulfuric acid–dimethylamine: 5A5N1P.

## Electrically Neutral Particle Formation

Based on the Gibbs free energies, we simulated new-particle formation rates with the ACDC model and compared the results to atmospheric measurements,<sup>15–17</sup> investigating which simulated base concentrations yield NPF rates close to the measurements. It should be noted that our simulations consider only a single base at a time and the effect of hydration has not been considered, whereas atmospheric measurements include contributions of multiple compounds and synergistic effects might have a significant role. Figure S2 shows the simulated NPF rates considering only electrically neutral molecular clusters for each base, together with the rates deduced from measurements. The figure includes NPF rates at four different base concentrations that yield results close to the experimental rates at atmospherically relevant sulfuric acid vapor concentrations.

In the case of guanidine and sulfuric acid, a guanidine concentration of 0.001–1 ppt<sub>v</sub> is needed to yield NPF rates of the magnitude of the observations. In the sulfuric acid–dimethylamine case, dimethylamine concentration of 0.1–100 ppt<sub>v</sub> is needed, and ammonia-enhanced particle formation requires 10<sup>4</sup>–10<sup>7</sup> ppt<sub>v</sub> of ammonia. However, as stated above, these results address two-component systems: it has been demonstrated that the presence of ammonia increases particle formation when added to a two-component sulfuric acid–amine system.<sup>2,18,19</sup> Due to the fact that in the atmosphere ammonia is in practice always present, it can thus be assumed that even lower dimethylamine concentrations can produce NPF rates of the order of the observations.

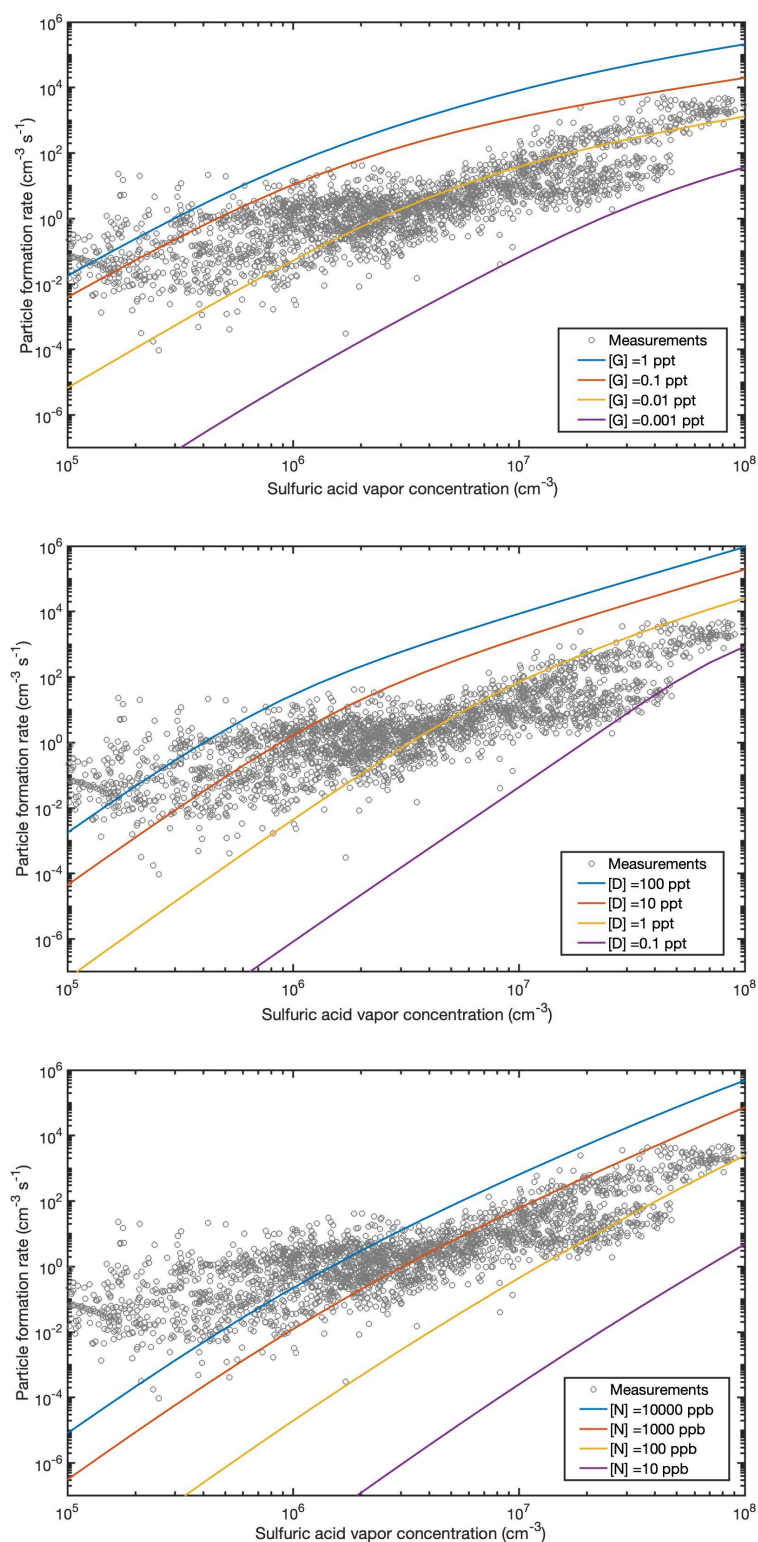

Figure S2: Simulated (lines) and observed (markers) new-particle formation rates as a function of sulfuric acid vapor concentration. Different base concentrations are used for guanidine (top), dimethylamine (middle) and ammonia (bottom).

## References

- (1) Myllys, N.; Ponkkonen, T.; Passananti, M.; Elm, J.; Vehkamäki, H.; Olenius, T. Guanine: A Highly Efficient Stabilizer in Atmospheric New-Particle Formation. *J. Phys. Chem. A* **2018**, *122*, 4717–4729.
- (2) Myllys, N.; Chee, S.; Olenius, T.; Lawler, M.; Smith, J. N. Molecular-Level Understanding of Synergistic Effects in Sulfuric Acid–Amine–Ammonia Mixed Clusters. *J. Phys. Chem. A* **2019**, *0*, just accepted.
- (3) Olenius, T.; Kupiainen-Määttä, O.; Ortega, I. K.; Kurtén, T.; Vehkamäki, H. Free Energy Barrier in the Growth of Sulfuric Acid–Ammonia and Sulfuric Acid–Dimethylamine Clusters. *J. Chem. Phys.* **2013**, *139*, 084312.
- (4) Karaboga, D.; Basturk, B. On the Performance of Artificial Bee Colony (ABC) Algorithm. *Appl. Soft Comput.* **2008**, *8*, 687–697.
- (5) Zhang, J.; Dolg, M. ABCcluster: The Artificial Bee Colony Algorithm for Cluster Global Optimization. *Phys. Chem. Chem. Phys.* **2015**, *17*, 24173–24181.
- (6) Zhang, J.; Dolg, M. Global Optimization of Clusters of Rigid Molecules using the Artificial Bee Colony Algorithm. *Phys. Chem. Chem. Phys.* **2016**, *18*, 3003–3010.
- (7) Vanommeslaeghe, K.; Hatcher, E.; Acharya, C.; Kundu, S.; Zhong, S.; Shim, J.; Darian, E.; Guvench, O.; Lopes, P.; Vorobyov, I.; Jr., A. D. M. CHARMM General Force Field: A Force Field for Drug-Like Molecules Compatible with the CHARMM All-Atom Additive Biological Force Fields. *J. Comput. Chem.* **2010**, *31*, 671–690.
- (8) Yu, W.; He, X.; Vanommeslaeghe, K.; Jr., A. D. M. Extension of the CHARMM General Force Field to Sulfonyl-Containing Compounds and Its Utility in Biomolecular Simulations. *J. Comput. Chem.* **2012**, *33*, 2451–2468.

- (9) Grimme, S.; Bannwarth, C.; Shuskov, P. A Robust and Accurate Tight-Binding Quantum Chemical Method for Structures, Vibrational Frequencies, and Noncovalent Interactions of Large Molecular Systems Parametrized for all spd-Block Elements ( $Z = 1$ -86). *J. Chem. Theory Comput.* **2017**, *13*, 1989–2009.
- (10) Chai, J.-D.; Head-Gordon, M. Long-Range Corrected Hybrid Density Functionals with Damped Atom-Atom Dispersion Corrections. *Phys. Chem. Chem. Phys.* **2008**, *10*, 6615–6620.
- (11) Kupiainen-Määttä, O.; Olenius, T.; Kurtén, T.; Vehkamäki, H. CIMS Sulfuric Acid Detection Efficiency Enhanced by Amines Due to Higher Dipole Moments: A Computational Study. *J. Phys. Chem. A* **2013**, *117*, 14109–14119.
- (12) Su, T.; Chesnavich, W. J. Parametrization of the Ion–Polar Molecule Collision Rate Constant by Trajectory Calculations. *J. Chem. Phys.* **1982**, *76*, 5183–5185.
- (13) McGrath, M. J.; Olenius, T.; Ortega, I. K.; Loukonen, V.; Paasonen, P.; Kurtén, T.; Kulmala, M.; Vehkamäki, H. Atmospheric Cluster Dynamics Code: a Flexible Method for Solution of the Birth–Death Equations. *Atmos. Chem. Phys.* **2012**, *12*, 2345–2355.
- (14) Lehtinen, K. E.; Maso, M. D.; Kulmala, M.; Kerminen, V.-M. Estimating Nucleation Rates from Apparent Particle Formation Rates and vice versa: Revised Formulation of the Kerminen–Kulmala Equation. *J. Aerosol Sci.* **2007**, *38*, 988–994.
- (15) Paasonen, P. et al. On the Roles of Sulphuric Acid and Low-Volatility Organic Vapours in the Initial Steps of Atmospheric New Particle Formation. *Atmos. Chem. Phys.* **2010**, *10*, 11223–11242.
- (16) Sihto, S.-L.; Kulmala, M.; Kerminen, V.-M.; Dal Maso, M.; Petäjä, T.; Riipinen, I.; Korhonen, H.; Arnold, F.; Janson, R.; Boy, M.; Laaksonen, A.; Lehtinen, K. E. J. Atmospheric Sulphuric Acid and Aerosol Formation: Implications from Atmospheric

- Measurements for Nucleation and Early Growth Mechanisms. *Atmos. Chem. Phys.* **2006**, *6*, 4079–4091.
- (17) Kuang, C.; McMurry, P. H.; McCormick, A. V.; Eisele, F. L. Dependence of Nucleation Rates on Sulfuric Acid Vapor Concentration in Diverse Atmospheric Locations. *J. Geophys. Res. Atmos.* **2008**, *113*.
- (18) Yu, H.; McGraw, R.; Lee, S.-H. Effects of Amines on Formation of Sub-3 nm Particles and Their Subsequent Growth. *Geophys. Res. Lett.* **2012**, *39*, 2.
- (19) Glasoe, W.; Volz, K.; Panta, B.; Freshour, N.; Bachman, R.; Hanson, D.; McMurry, P.; Jen, C. Sulfuric Acid Nucleation: An Experimental Study of the Effect of Seven Bases. *J. Geophys. Res. Atmos.* **2015**, *120*, 1933–1950.
