# Supplementary material for: Role of base strength, cluster structure and charge in sulfuric-acid-driven particle formation
Source: Copernicus journal article supplement (doi:10.5194/acp-19-9753-2019), 2019-08-02
Supplement: Supplementary file 1 [file acp-19-9753-2019-supplement.zip › acp-19-9753-2019-supplement-title-page.pdf]

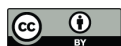

## Supplement of

# Role of base strength, cluster structure and charge in sulfuric-acid-driven particle formation

Nanna Myllys et al.

Correspondence to: Nanna Myllys (nanna.myllys@uci.edu)

- acp-19-9753-2019-supplement-title-page.pdf
- Acid-Base-Ions\_xyz
  - .DS\_Store
  - 1A.xyz
  - 1A1D.xyz
  - 1A1D1P.xyz
  - 1A2D.xyz
  - 1A2D1P.xyz
  - 1A3D.xyz
  - 1A3D1P.xyz
  - 1A4D.xyz
  - 1A4D1P.xyz
  - 1A5D1P.xyz
  - 1B.xyz
  - 1B1A.xyz
  - 1B1A1D.xyz
  - 1B1A2D.xyz
  - 1B1D.xyz
  - 1B2A.xyz
  - 1B2A1D.xyz
  - 1B2A2D.xyz
  - 1B2A3D.xyz
  - 1B2D.xyz
  - 1B3A.xyz
  - 1B3A1D.xyz
  - 1B3A2D.xyz
  - 1B3A3D.xyz
  - 1B3A4D.xyz
  - 1B4A.xyz
  - 1B4A1D.xyz
  - 1B4A2D.xyz
  - 1B4A3D.xyz
  - 1B4A4D.xyz
  - 1D.xyz
  - 1D1P.xyz
  - 1a1g.xyz
  - 1a1g1p.xyz
  - 1a1n.xyz
  - 1a1n1p.xyz
  - 1a2g.xyz
  - 1a2g1p.xyz
  - 1a2n.xyz
  - 1a2n1p.xyz
  - 1a3g.xyz
  - 1a3g1p.xyz
  - 1a3n.xyz
  - 1a3n1p.xyz
  - 1a4g.xyz
  - 1a4g1p.xyz
  - 1a4n.xyz
  - 1a4n1p.xyz
  - 1a5g1p.xyz
  - 1a5n1p.xyz
  - 1b1a1g.xyz
  - 1b1a1n.xyz
  - 1b1a2g.xyz
  - 1b1a2n.xyz
  - 1b1g.xyz
  - 1b1n.xyz
  - 1b2a1g.xyz
  - 1b2a1n.xyz
  - 1b2a2g.xyz
  - 1b2a2n.xyz
  - 1b2a3g.xyz
  - 1b2a3n.xyz
  - 1b2g.xyz
  - 1b2n.xyz
  - 1b3a1g.xyz
  - 1b3a1n.xyz
  - 1b3a2b.xyz
  - 1b3a2n.xyz
  - 1b3a3g.xyz
  - 1b3a3n.xyz
  - 1b3a4g.xyz

|              |              |                                     |
|--------------|--------------|-------------------------------------|
| - 1b3a4n.xyz | - 2a3n1p.xyz | - 3g.xyz                            |
| - 1b4a1g.xyz | - 2a4g.xyz   | - 3g1p.xyz                          |
| - 1b4a1n.xyz | - 2a4g1p.xyz | - 3n.xyz                            |
| - 1b4a2g.xyz | - 2a4n.xyz   | - 3n1p.xyz                          |
| - 1b4a2n.xyz | - 2a4n1p.xyz | - 4A.xyz                            |
| - 1b4a3g.xyz | - 2a5g1p.xyz | - 4A1D.xyz                          |
| - 1b4a3n.xyz | - 2a5n1p.xyz | - 4A2D.xyz                          |
| - 1b4a4g.xyz | - 2g.xyz     | - 4A3D.xyz                          |
| - 1b4a4n.xyz | - 2g1p.xyz   | - 4A3D1P.xyz                        |
| - 1g.xyz     | - 2n.xyz     | - 4A4D.xyz                          |
| - 1g1p.xyz   | - 2n1p.xyz   | - 4A4D1P.xyz                        |
| - 1n.xyz     | - 3A.xyz     | - 4A5D1P.xyz                        |
| - 1n1p.xyz   | - 3A1D.xyz   | - 4D.xyz                            |
| - 2A.xyz     | - 3A2D.xyz   | - 4D1P.xyz                          |
| - 2A1D.xyz   | - 3A3D.xyz   | - 4a1g.xyz                          |
| - 2A1D1P.xyz | - 3A3D1P.xyz | - 4a1n.xyz                          |
| - 2A2D.xyz   | - 3A4D.xyz   | - 4a2g.xyz                          |
| - 2A2D1P.xyz | - 3A4D1P.xyz | - 4a2n.xyz                          |
| - 2A3D.xyz   | - 3A5D1P.xyz | - 4a3g.xyz                          |
| - 2A3D1P.xyz | - 3D.xyz     | - 4a3n.xyz                          |
| - 2A4D.xyz   | - 3D1P.xyz   | - 4a3n1p.xyz                        |
| - 2A4D1P.xyz | - 3a1g.xyz   | - 4a4g.xyz                          |
| - 2A5D1P.xyz | - 3a1n.xyz   | - 4a4g1p.xyz                        |
| - 2D.xyz     | - 3a2g.xyz   | - 4a4n.xyz                          |
| - 2D1P.xyz   | - 3a2n.xyz   | - 4a4n1p.xyz                        |
| - 2a1g.xyz   | - 3a2n1p.xyz | - 4a5g1p.xyz                        |
| - 2a1g1p.xyz | - 3a3g.xyz   | - 4a5n1p.xyz                        |
| - 2a1n.xyz   | - 3a3g1p.xyz | - 4g.xyz                            |
| - 2a1n1p.xyz | - 3a3n.xyz   | - 4g1p.xyz                          |
| - 2a2g.xyz   | - 3a3n1p.xyz | - 4n.xyz                            |
| - 2a2g1p.xyz | - 3a4g.xyz   | - 4n1p.xyz                          |
| - 2a2n.xyz   | - 3a4g1p.xyz | - 5D1P.xyz                          |
| - 2a2n1p.xyz | - 3a4n.xyz   | - 5g1p.xyz                          |
| - 2a3g.xyz   | - 3a4n1p.xyz | - 5n1p.xyz                          |
| - 2a3g1p.xyz | - 3a5g1p.xyz | - SupportingInfo-Acid-Base-Ions.pdf |
| - 2a3n.xyz   | - 3a5n1p.xyz |                                     |

The copyright of individual parts of the supplement might differ from the CC BY 4.0 License.
